# Supplementary material for: Polymerizable Gd(iii) building blocks for the synthesis of high relaxivity macromolecular MRI contrast agents
Source: Royal Society of Chemistry journal article supplement (doi:10.1039/d0sc04750c), 2021-01-01
Supplement: d0sc04750c1.pdf [file d0sc04750c1.pdf]

# Supporting Information

## **Polymerizable Gd(III) Buildings Blocks for the Synthesis of High Relaxivity Macromolecular MRI Contrast Agents.**

Thomas R. Berki,<sup>ab</sup> Jonathan Martinelli,<sup>c</sup> Lorenzo Tei,<sup>c</sup> Helen Willcock<sup>\*a</sup> and Stephen J. Butler<sup>\*b</sup>.

<sup>a</sup>Department of Chemistry, Loughborough University, Leicestershire, LE11 3TU, UK.

<sup>b</sup>Department of Materials, Loughborough University, Leicestershire, LE11 3TU, UK.

<sup>c</sup>Department of Science and Technological Innovation, Università del Piemonte Orientale, I15121, Alessandria, Italy.

# Table of Contents

|      |                                                                                                                                                                          |    |
|------|--------------------------------------------------------------------------------------------------------------------------------------------------------------------------|----|
| 1    | Instrumentation . . . . .                                                                                                                                                | 3  |
| 2    | Gd Complexes Synthesis and Characterisation . . . . .                                                                                                                    | 5  |
| 2.1  | Synthesis of Cyclen derivatives: DO <sub>3</sub> A, <i>cis</i> -DO <sub>2</sub> A and <i>trans</i> -DO <sub>2</sub> A. . .                                               | 5  |
| 2.2  | Synthesis of $\alpha$ -Bromoester Arms Derived from Amino Acids . . . . .                                                                                                | 9  |
| 2.3  | Synthesis of Gd.L <sub>1-3</sub> . . . . .                                                                                                                               | 12 |
| 2.4  | Synthesis of Gd.L <sub>4</sub> . . . . .                                                                                                                                 | 27 |
| 2.5  | High Performace Liquid Chromatography . . . . .                                                                                                                          | 30 |
| 3    | Characterisation of Linear and Hyperbranched polymeric CAs . . . . .                                                                                                     | 31 |
| 4    | Relaxometry Study Data . . . . .                                                                                                                                         | 37 |
| 4.1  | Acquisition of NMRD Profiles . . . . .                                                                                                                                   | 37 |
| 4.2  | Acquisition of Variable Temperature relaxometry profiles . . . . .                                                                                                       | 37 |
| 4.3  | NMRD Profiles Discrete Complexes . . . . .                                                                                                                               | 38 |
| 4.4  | Fitted NMRD Profiles of Gd.L <sub>1-4</sub> . . . . .                                                                                                                    | 42 |
| 4.5  | <sup>17</sup> O NMR Raw Data Gd Complexes . . . . .                                                                                                                      | 42 |
| 4.6  | NMRD Raw Data and Fitted NMRD Profiles of Linear<br>P(NAM-r-Gd.L <sub>1</sub> ) polymers . . . . .                                                                       | 48 |
| 4.7  | NMRD Raw Data and Fitted NMRD Profiles of Hyperbranched<br>P(NAM-r-Gd.L <sub>2-4</sub> ) Polymers . . . . .                                                              | 53 |
| 4.8  | Fitted NMRD profiles and NMRD Parameters obtained for the Partial<br>Fitting (1-100 MHz) of Hyperbranched Systems NMRD Data Sets . . .                                   | 56 |
| 4.9  | Fitted NMRD profiles and NMRD parameters obtained for the fitting of<br>Hyperbranched Systems over the all magnetic field range 0.01-100 MHz<br>NMRD Data Sets . . . . . | 59 |
| 4.10 | VT Profiles of Linear Polymeric Systems . . . . .                                                                                                                        | 61 |
| 4.11 | VT Profiles of Hyperbranched Polymeric Systems . . . . .                                                                                                                 | 62 |
| 4.12 | Discussion over VT Profiles . . . . .                                                                                                                                    | 63 |
| 5    | Theoretical Models to Explain Paramagnetic Relaxation Enhancement . . . . .                                                                                              | 65 |
| 5.1  | Discrete Complex NMRD Profiles - the SBM Theory . . . . .                                                                                                                | 65 |
| 5.2  | Macromolecules NMRD Profiles - the Lipari-Szabo Model . . . . .                                                                                                          | 67 |



## 1 Instrumentation

**NMR.**  $^1\text{H}$  and  $^{13}\text{C}$  nuclear magnetic resonance (NMR) spectra were recorded in commercially available deuterated solvents on a JEOL ECS-400 spectrometer ( $^1\text{H}$  at 399.782 MHz,  $^{13}\text{C}$  at 100.525 MHz), a Bruker Advance Ultra-Shield 400 spectrometer ( $^1\text{H}$  at 400.134 MHz,  $^{13}\text{C}$  at 100.624 MHz) and a JEOL ECZ-500R spectrometer ( $^1\text{H}$  at 500.160 MHz,  $^{13}\text{C}$  at 125.765 MHz) at 293 K. Chemical shifts are expressed as  $\delta$  in parts per million (ppm) and are referenced to the residual protio-solvent resonances ( $\text{CDCl}_3$ ,  $^1\text{H}$ :  $\delta = 7.26$  ppm;  $^{13}\text{C}$ :  $\delta = 77.16$  ppm;  $\text{D}_2\text{O}$ ,  $^1\text{H}$ :  $\delta = 4.79$  ppm;  $\text{CD}_3\text{OD}$ ,  $^1\text{H}$ :  $\delta = 3.31$  ppm,  $^{13}\text{C}$ :  $\delta = 49.0$  ppm).  $^1\text{H}$  coupling constants ( $J$ ) are reported in hertz (Hz). Assignment of signals in  $^1\text{H}$  and  $^{13}\text{C}$  spectra were resolved using  $^1\text{H}$ - $^1\text{H}$  correlated spectroscopy (COSY), distortionless enhancement by polarization transfer (DEPT), heteronuclear multiple quantum correlation (HMQC), heteronuclear multiple bond correlation (HMBC) and total correlation spectroscopy (TOCSY) experiments when appropriate.

**IR.** Infrared spectra were recorded using neat compounds on a Thermo Scientific Fourier Transform Infrared Spectrometer Nicolet iS5 equipped with a iD7 ATR module irradiating between 4000 and 600  $\text{cm}^{-1}$ . Only relevant absorbances are reported. The data were recorded using OMNIC software.

**Chromatography.** Column chromatography was performed using flash silica gel 60 (particle size 40–63 microns) purchased from Apollo Scientific. Thin layer chromatography (TLC) was performed on aluminium sheet silica gel plates with 0.2 mm thick silica gel 60 F254 using the stated mobile phase. Preparative RP-HPLC was performed using a Waters 2489 UV/Visible detector performed at 254 nm, a Waters 1525 Binary HPLC pump controlled by the Waters Breeze 2 HPLC system software. Separation was achieved using a semi-preparative XBridge C18 (5  $\mu\text{m}$  OBD 19  $\times$  100 mm) column at a flow rate maintained at 17 mL/min. A solvent system composed of either water (0.05% formic acid) / acetonitrile (0.05% formic acid) or water (25 mM  $\text{NH}_4\text{HCO}_3$ ) / acetonitrile was used over the stated linear gradient (usually 0 to 100% organic solvent over 10 minutes). Analytical RP-HPLC was performed using a XBridge C18 (5  $\mu\text{m}$  4.6  $\times$  100 mm) column at a flow rate maintained at 2.0 mL/min using the stated gradient and solvents.

**Mass spectrometry.** Liquid Chromatography Electrospray mass spectra were recorded on a Shimadzu LC-2020 system and controlled using LabSolutions, version 5.86 SP1 software. The system operates in positive or negative ion mode, with acetonitrile as the carrier solvent. The flow rate was maintained at 0.7 mL/min over a gradient of 5 to 95% acetonitrile (0.03% formic acid) in water (0.03% formic acid) for 10 minutes. High resolution mass spectra were recorded using a Thermofisher Q-Exactive Orbitrap mass spectrometer.

**Size exclusion chromatography.** SEC analyses were performed on different systems. On an Agilent technologies 1260 Infinity system, comprising an Auto sampler 1260 ALS, a pump 1260 Iso pump, a column oven 1260 TCC, an Agilent PLGel 5  $\mu\text{m}$  MIXED-C column, a reflexive index detector (RID). Each measurement was done by injection of 20  $\mu\text{L}$  of a sample chloroform (2% TEA) solution, at 313 K, at a flow rate of 1 mL/min. The calibration was made with polystyrene standards (PS, Easivial PM, Agilent). Number average molecular weight ( $M_n$ ) weight average molecular weight ( $M_w$ ) and dispersity ( $\mathcal{D}$ ) were determined using the Agilent Technologies SEC software version 1.0. SEC data were also acquired on an Agilent 1260 Infinity II Multi-Detector GPC/SEC system with RI and ultraviolet (UV) detectors ( $\lambda = 309\text{nm}$ ) and PLGel 3  $\mu\text{m}$  ( $50 \times 7.5\text{ mm}$ ) guard column and two PLGel 5  $\mu\text{m}$  ( $300 \times 7.5\text{ mm}$ ) mixed-C columns with DMF containing 5 mM  $\text{NH}_4\text{BF}_4$  as the eluent (flow rate 1 mL/min, 50  $^\circ\text{C}$ ). A calibration curve based on poly(methyl methacrylate) standards (PMMA, Easivial PM, Agilent) was applied for determination of molecular weights.

**ICP-MS Measurements.** The exact concentration of Gd(III) was also determined by inductively coupled plasma mass spectrometry (ICP-MS) with a Thermo Optek XSeries 2 spectrometer. Sample digestion was prepared by dissolving a known amount of the solid (around 1 mg) in fuming nitric acid (1.000 mL) in a 1 mL prescored ampule. The ampules were sealed and stored in an oven at 120  $^\circ\text{C}$  for 24 hours. The resulting solutions were allowed to cool to room temperature and were diluted 400, 500, 4000 or 50000 fold, depending on the Gd concentration, to obtain  $[\text{Gd}] < 50\text{ ppb}$ . Before any measurement, the instrumental settings were optimised to reach maximal sensitivity for Gd. For quantitative determination, the isotopes of Gd and In (used as internal standard) were measured at  $m/z$  157 and 115, respectively. A calibration curve was obtained by dilution of a 100 ppb gadolinium standard stock solution in an aqueous solution of nitric acid (1.0%  $v/v$ ). The concentrations used to build the calibration curve were 0.5 ppb, 5 ppb, 25 ppb and 50 ppb.

## 2 Gd Complexes Synthesis and Characterisation

### 2.1 Synthesis of Cyclen derivatives: DO<sub>3</sub>A, *cis*-DO<sub>2</sub>A and *trans*-DO<sub>2</sub>A.

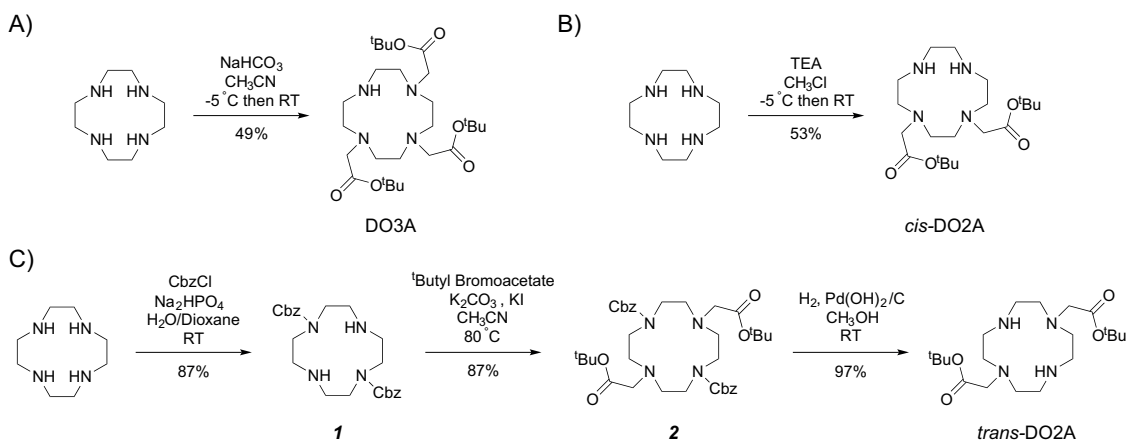

**Scheme S1.** Synthetic procedure for the preparation of macrocycles: A) DO<sub>3</sub>A (**1**), B) *cis*-DO<sub>2</sub>A (**2**) and C) *trans*-DO<sub>2</sub>A (**5**).

#### 2.1.1 Tri-*tert*-butyl-2,2',2''-(1,4,7,10-tetraazacyclododecane-1,4,7-triyl)-triacetate or DO<sub>3</sub>A (**1**)

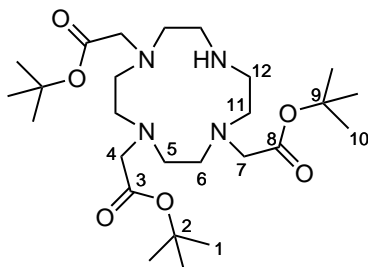

Compound **1** was synthesised following the modification of literature procedures.<sup>1–4</sup> Under an atmosphere of N<sub>2</sub>, *tert*-Butylbromoacetate (5.06 mL, 34.3 mmol, 2.95 equiv.) was added drop-wise over a period of 2 hours to a cold (–5 °C) stirred solution of cyclen (2.00 g, 11.6 mmol, 1.00 equiv.) and NaHCO<sub>3</sub> (2.93 g, 34.8 mmol, 3.00 equiv.) in anhydrous CH<sub>3</sub>CN (40.0 mL). The reaction was then stirred for 72 hours at room temperature. Solids were removed by filtration and the solvent was evaporated under reduced pressure. The residue was purified by flash column chromatography (silica gel, pure CH<sub>2</sub>Cl<sub>2</sub> to CH<sub>2</sub>Cl<sub>2</sub>/CH<sub>3</sub>OH, 92:8 v/v, with an increment of 2%) to yield compound **1** (2.97 g, 5.78 mmol, 50%) as an amorphous solid. **IR** ( $\nu_{\text{max}}/\text{cm}^{-1}$ , neat): 3650, 2980, 2736, 1728, 1716, 1575, 1450, 1364, 1253, 1143. **R<sub>f</sub>** (CH<sub>2</sub>Cl<sub>2</sub>/CH<sub>3</sub>OH, 90:10 v/v): 0.44. **<sup>1</sup>H NMR** (400 MHz, CDCl<sub>3</sub>)  $\delta$  (ppm): 3.32 (4H, s, H<sup>7</sup>), 3.23 (2H, s, H<sup>4</sup>), 3.00–2.75 (16H, m, H<sup>5,6,11,12</sup>), 1.40(2) (18H, s, H<sup>10</sup>), 1.39(6) (9H, s,

H<sup>1</sup>). N-H signals not observed. <sup>13</sup>C NMR (101 MHz, CDCl<sub>3</sub>) δ (ppm): 170.5 (C<sup>8</sup>), 169.6 (C<sup>3</sup>), 81.8 (C<sup>2</sup>), 81.7 (C<sup>9</sup>), 58.2 (C<sup>7</sup>), 51.3 (CH<sub>2</sub> cyclen), 51.2 (CH<sub>2</sub> cyclen), 49.1 (CH<sub>2</sub> cyclen), 47.5 (CH<sub>2</sub> cyclen), 48.7 (C<sup>4</sup>), 28.2(3) (C<sup>1</sup>), 28.2(0) (C<sup>10</sup>). HRMS (ESI<sup>+</sup>, m/z): calculated for C<sub>26</sub>H<sub>51</sub>N<sub>4</sub>O<sub>6</sub>, [M+H]<sup>+</sup>:515.3803, found 515.3801.

Spectral data were in accordance with that reported in the literature.<sup>1–3,5</sup>

### 2.1.2 Di-*tert*-butyl-2,2'-(1,4,7,10-tetraazacyclododecane-1,4-diyl)diacetate or *cis*-DO2A (2)

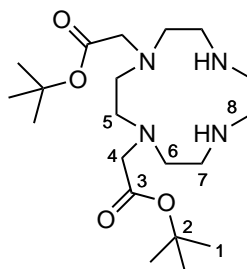

Compound **2** was synthesised following the modification of literature procedures.<sup>6,7</sup> 1,4,7,10-Tetraazacyclododecane (2.00 g, 11.6 mmol, 1.00 equiv.) and triethylamine (16.2 mL, 116 mmol, 10.0 equiv.) were dissolved in anhydrous CHCl<sub>3</sub> (200 mL) at room temperature. After 5 minutes, the reaction mixture was cooled down to –5 °C. A solution of *tert*-butyl bromoacetate (3.43 mL, 23.2 mmol, 2.00 equiv.) in CHCl<sub>3</sub> (25.0 mL) was added dropwise to the vigorously stirred reaction mixture, over a period of 2 hours at –5 °C. The reaction mixture was then stirred at room temperature overnight. Volatiles were evaporated and the resulting residue was dissolved in deionised water (100 mL). The pH was then adjusted to 3 by addition of aq. of HCl. Underised over-alkylated products were extracted with CHCl<sub>3</sub> (4 × 50 mL). pH was then adjusted to 6 by addition of aq. NaOH and the aqueous layer was washed again with CHCl<sub>3</sub> (4 × 50 mL) to remove remaining over-alkylated product. Finally, pH was adjusted to 7–8 and the desired product was extracted with CHCl<sub>3</sub> (4 × 50 mL). These organic layers were combined, dried over MgSO<sub>4</sub> and concentrated. The residue was purified by column chromatography (silica gel, CH<sub>2</sub>Cl<sub>2</sub>/CH<sub>3</sub>OH 98:2 v/v to CH<sub>2</sub>Cl<sub>2</sub>/CH<sub>3</sub>OH, 84:16 v/v, with an increment of 2%) to yield compound **2** (2.46 g, 6.13 mmol, 53%) as a slightly orange amorphous solid. IR (ν<sub>max</sub>/cm<sup>–1</sup>, neat): 3314, 2974, 2853, 1723, 1596, 1457, 1367, 1147. <sup>1</sup>H NMR (400 MHz, CDCl<sub>3</sub>) δ (ppm): 3.34 (4H, s, H<sup>4</sup>), 3.10–2.96 (8H, m, 4 × CH<sub>2</sub> cyclen), 2.96–2.80 (8H, m, 4 × CH<sub>2</sub> cyclen), 1.43 (18H, s, H<sup>1</sup>). N-H signals are not observed. <sup>13</sup>C NMR (101 MHz, CDCl<sub>3</sub>) δ (ppm): 170.4 (C<sup>3</sup>), 81.9 (C<sup>2</sup>), 53.5 (C<sup>4</sup>), 51.2, 49.9, 46.6, 46.2 (CH<sub>2</sub> cyclen), 28.3 (C<sup>1</sup>). HRMS (ESI<sup>+</sup>, m/z): calculated for C<sub>20</sub>H<sub>41</sub>N<sub>4</sub>O<sub>4</sub>, [M+H]<sup>+</sup>:401.3122, found 401.3121.

Spectral data were in accordance with that reported in the literature.<sup>6,7</sup>

### 2.1.3 Dibenzyl 1,4,7,10-tetraazacyclododecane-1,7-dicarboxylate (**3**)

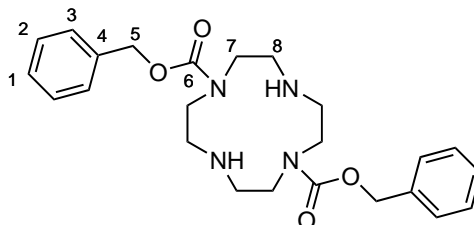

Compound **3** was synthesised following the modification of literature procedures.<sup>6,8–10</sup> Cyclen (5.00 g, 29.0 mmol, 1.00 equiv.) and Na<sub>2</sub>HPO<sub>4</sub> (14.0 g, 98.7 mmol, 3.40 equiv.) were dissolved in a mixture H<sub>2</sub>O/Dioxane (50:20, 70 mL). pH was then adjusted to 2.5 by careful addition of aq. HCl. The reaction mixture was stirred for 5 minutes at room temperature, and a solution of benzyl chloroformate (8.50 mL, 59.5 mmol, 2.05 equiv.) in dioxane (20.0 mL) was added dropwise over 4 hours. After the addition, the reaction mixture was stirred overnight at room temperature and then concentrated to dryness. The resulting residue was then dissolved in H<sub>2</sub>O (200 mL) and the pH was adjusted to 7 by addition of aq. KOH. The aqueous solution was washed with Et<sub>2</sub>O (2 × 200 mL) and extracted with CH<sub>2</sub>Cl<sub>2</sub> (2 × 200 mL). The first CH<sub>2</sub>Cl<sub>2</sub> fraction (the only fraction containing pure product), was dried over MgSO<sub>4</sub>, filtered and concentrated under reduced pressure to yield compound **3** (11.1 g, 25.2 mmol, 87%) as a white solid. **IR** ( $\nu_{max}/\text{cm}^{-1}$ , **neat**): 3356, 3248, 3186, 2980, 2860, 1694, 1412, 1260, 1121, 1003. **<sup>1</sup>H NMR** (400 MHz, CDCl<sub>3</sub>)  $\delta$  (ppm): 7.50–7.30 (10H, m, H<sup>1,2,3</sup>), 5.16 (4H, d, <sup>4</sup>*J* = 3.2 Hz, H<sup>5</sup>), 3.90–3.50 (8H, m, H<sup>7</sup>), 3.20–2.80 (8H, m, H<sup>8</sup>). N-H signals are not observed. **<sup>13</sup>C NMR** (101 MHz, CDCl<sub>3</sub>)  $\delta$  (ppm): 156.3 (C<sup>6a</sup>), 156.2 (C<sup>6b</sup>), 136.0 (C<sup>4</sup>), 128.8(3) (C<sup>2a</sup> or C<sup>3a</sup>), 128.7(8) (C<sup>3a</sup> or C<sup>2a</sup>), 128.6 (C<sup>1a</sup>), 128.5 (C<sup>1b</sup>), 128.2 (C<sup>2b</sup> or C<sup>3b</sup>), 128.1 (C<sup>3b</sup> or C<sup>2b</sup>), 68.0 (C<sup>5a</sup>), 67.9 (C<sup>5b</sup>), 50.7, 50.5, 50.3, 49.9, 49.7, 49.2, 49.0 (CH<sub>2</sub> cyclen). **HRMS** (ESI<sup>+</sup>, **m/z**): calculated for C<sub>24</sub>H<sub>33</sub>N<sub>4</sub>O<sub>4</sub>, [M+H]<sup>+</sup>:441.2496, found 441,2496.

Spectral data were in accordance with that reported in the literature.<sup>6,8–10</sup>



#### 2.1.4 Intermediate Dibenzyl 4,10-bis(2-(*tert*-butoxy)-2-oxoethyl)-1,4,7,10-tetraazacyclododecane-1,7-dicarboxylate (4)

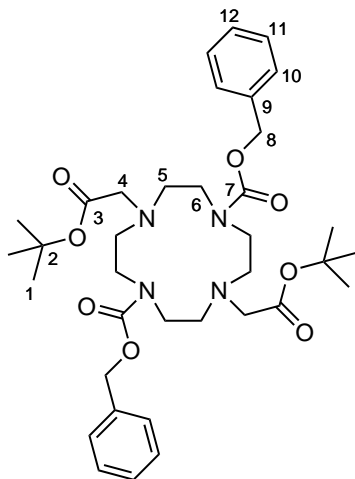

Compound **4** was synthesised following the modification of literature procedures.<sup>9,11,12</sup> Bis-amine **3** (11.1 g, 25.2 mmol, 1.00 equiv.) and potassium carbonate (13.9 g, 101 mmol, 4.00 equiv.) were dissolved in anhydrous CH<sub>3</sub>CN (150 mL) at room temperature. *tert*-Butyl bromoacetate (7.63 mL, 51.6 mmol, 2.05 equiv.) was added and the reaction mixture was stirred at 60 °C overnight. Solids were removed by filtration and the filtrate was concentrated under reduced pressure to obtain a yellow oil. The crude residue was purified by flash column chromatography (silica gel, pure CH<sub>2</sub>Cl<sub>2</sub> to CH<sub>2</sub>Cl<sub>2</sub>/CH<sub>3</sub>OH, 98:2 v/v, with an increment of 0.5%) to yield compound **4** (14.1 g, 21.1 mmol, 84%) as a yellow liquid. **IR** ( $\nu_{max}/\text{cm}^{-1}$ , *neat*): 2979, 2932, 2733, 1693, 1454, 1420, 1245, 1147. **<sup>1</sup>H NMR** (400 MHz, CDCl<sub>3</sub>)  $\delta$  (ppm): 7.40-7.20 (10H, m, H<sup>10,11,12</sup>), 5.08 (4H, s, H<sup>8</sup>), 3.38 (8H, m, H<sup>6</sup>), 3.30-3.10 (4H, m, H<sup>4</sup>), 2.95-2.70 (8H, m, H<sup>5</sup>), 1.39 (18H, s, H<sup>1</sup>). **<sup>13</sup>C NMR** (101 MHz, CDCl<sub>3</sub>)  $\delta$  (ppm): 170.4 (C<sup>3</sup>), 156.3 (C<sup>7</sup>), 136.8 (C<sup>9</sup>), 128.4 (C<sup>11</sup> or C<sup>10</sup>), 127.9 (C<sup>12</sup>), 127.8 (C<sup>10</sup> or C<sup>11</sup>), 80.8 (C<sup>2</sup>), 66.9 (C<sup>8</sup>), 56.0 (C<sup>4</sup>), 54.3, 54.0, 46.9, 46.6 (CH<sub>2</sub> cyclen), 28.1 (C<sup>1</sup>). **HRMS** (ESI<sup>+</sup>, *m/z*): calculated for C<sub>36</sub>H<sub>53</sub>N<sub>4</sub>O<sub>8</sub>, [M+H]<sup>+</sup>:669.3858, found 669.3868.

Spectral data were in accordance with that reported in the literature.<sup>9,11,12</sup>

#### 2.1.5 Di-*tert*-butyl-2,2'-(1,4,7,10-tetraazacyclododecane-1,7-diyl)diacetate (5)

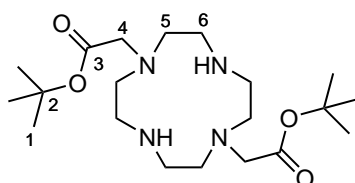

Compound **5** was synthesised following the modification of literature procedures.<sup>6,9,13</sup> Compound **4** (14.1 g, 21.1 mmol, 1.00 equiv.) and Pd(OH)<sub>2</sub>/C (1.48 g, 2.11 mmol, 0.10 equiv.) was suspended in CH<sub>3</sub>OH (38.0 mL) at room temperature. The atmosphere was purged with argon and the inert gas was then replaced by hydrogen. The reaction mixture was stirred at room temperature for 3 days. The catalyst was removed by 2 successive filtrations through pads of Celite®. The filtrate was concentrated under reduced pressure and the residue was dissolved in acidic water (pH 3, HCl, 150 mL). The aqueous solution was washed with ethyl acetate (2 × 50.0 mL) and CH<sub>2</sub>Cl<sub>2</sub> (2 × 50.0 mL) to remove of organic impurities (*e.g.* remaining starting material, over-alkylated product). The pH of the water phase was then adjusted to 6 and washed again with CH<sub>2</sub>Cl<sub>2</sub> (3 × 50.0 mL) to remove other impurities. Finally, the pH was adjusted to 9-10 and the product was back extracted with CH<sub>2</sub>Cl<sub>2</sub> (5 × 50.0 mL). The CH<sub>2</sub>Cl<sub>2</sub>'s fractions (only) were combined, dried over MgSO<sub>4</sub> and concentrated under reduced pressure, to yield compound **5** (7.31 g, 18.2 mmol, 86%) as a viscous oil. **IR** ( $\nu_{max}/\text{cm}^{-1}$ , *neat*): 3456, 3281, 3222, 2976, 2821, 1721, 1473, 1145. **<sup>1</sup>H NMR** (400 MHz, CDCl<sub>3</sub>)  $\delta$  (ppm): 3.38 (4H, s, H<sup>4</sup>), 2.92 (8H, m, H<sup>5</sup>), 2.73 (8H, m, H<sup>6</sup>), 1.45 (18H, s, H<sup>1</sup>). N-H signals are not observed. **<sup>13</sup>C NMR** (101 MHz, CDCl<sub>3</sub>)  $\delta$  (ppm): 171.2 (C<sup>3</sup>), 81.5 (C<sup>2</sup>), 57.1 (C<sup>4</sup>), 52.1 (C<sup>5</sup>), 47.2 (C<sup>6</sup>), 28.3 (C<sup>1</sup>). **HRMS** (ESI<sup>+</sup>, *m/z*): calculated for C<sub>20</sub>H<sub>41</sub>N<sub>4</sub>O<sub>4</sub>, [M+H]<sup>+</sup>:401.3122, found 401.3120.

Spectral data were in accordance with that reported in the literature.<sup>6,9,13</sup>

## 2.2 Synthesis of $\alpha$ -Bromoester Arms Derived from Amino Acids

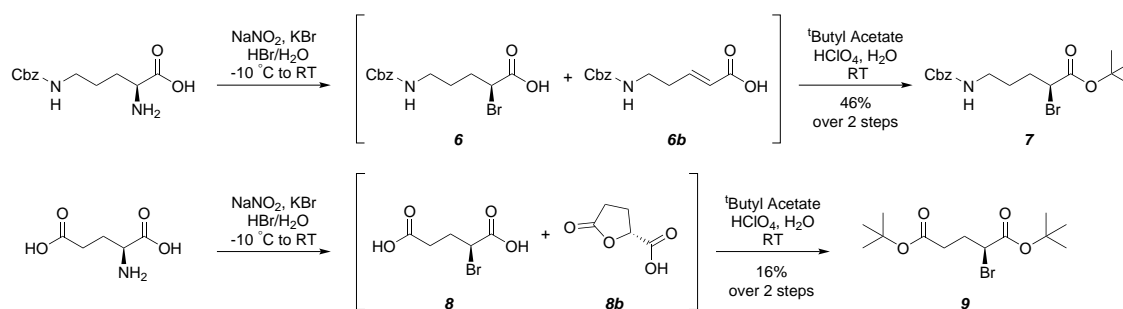

**Scheme S2.** Synthetic procedure of linker arms, **7** and **9**.

### 2.2.1 (*S*)-5-(((benzyloxy)carbonyl)amino)-2-bromopentanoic (**6**)

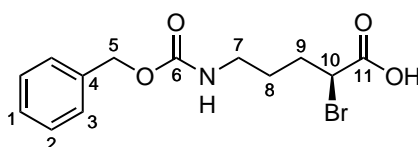

Compound **6** was synthesised following the modification of literature procedures.<sup>14–17</sup> A solution of sodium nitrite (2.59 g, 37.6 mmol, 2.00 equiv.) in water (5 mL) was added drop-wise over two hours to a cold (–10 °C) stirred solution of (*S*)-2-amino-5-(((benzyloxy)carbonyl)amino)pentanoic acid (5.00 g, 18.8 mmol, 1.00 equiv.), potassium bromide (8.27 g, 69.6 mmol, 3.70 equiv.), bromohydric acid (9.40 mL, 47.0 mmol, 2.50 equiv., 48% w/w in water) in water (100 mL). The resulting yellow solution was stirred at room temperature overnight. The reaction mixture was then extracted with diethyl ether (3 × 100 mL). The combined organic phases were washed with brine (100 mL), dried over MgSO<sub>4</sub>, filtered and concentrated under reduced pressure to yield as a viscous slightly yellow liquid. The crude product was used directly in the next step without further purification. For analytical purpose, a portion of the crude material was purified by flash column chromatography (silica gel, CH<sub>2</sub>Cl<sub>2</sub>/Acetic acid, 99:1 v/v) to afford compound **6** as a colourless oil. **IR** ( $\nu_{\max}/\text{cm}^{-1}$ , *neat*): 3310, 3084, 3026, 2982, 1740, 1596, 1493, 733, 694. **R<sub>f</sub>** (CH<sub>2</sub>Cl<sub>2</sub>/CH<sub>3</sub>COOH, **95:5**, v/v): 0.35. **<sup>1</sup>H NMR** (400 MHz, CDCl<sub>3</sub>)  $\delta$  (ppm): 7.60–7.28 (5H, m, H<sup>1,2,3</sup>), 5.51 (2H, s, H<sup>5</sup>), 4.21 (1H, dd, <sup>3</sup>*J* = 8.4, 6.4 Hz, H<sup>10</sup>), 3.79 (2H, t, <sup>3</sup>*J* = 7.2 Hz, H<sup>7</sup>), 2.15–1.80 (2H, m, H<sup>9</sup>), 1.75–1.50 (2H, m, H<sup>8</sup>). O-H and N-H signals are not observed. **<sup>13</sup>C NMR** (101 MHz, CDCl<sub>3</sub>)  $\delta$  (ppm): 173.8 (C<sup>11</sup>), 154.0 (C<sup>6</sup>), 134.5 (C<sup>4</sup>), 129.1 (C<sup>1</sup>), 128.9 (C<sup>2</sup> or C<sup>3</sup>), 128.8 (C<sup>3</sup> or C<sup>2</sup>), 70.1 (C<sup>5</sup>), 44.3 (C<sup>10</sup>), 39.8 (C<sup>7</sup>), 31.7 (C<sup>9</sup>), 24.9 (C<sup>8</sup>). **HRMS** (ESI<sup>+</sup>, *m/z*): calculated for C<sub>13</sub>H<sub>16</sub><sup>79</sup>BrNNaO<sub>4</sub>, [M+Na]<sup>+</sup>: 352.0155, found 352.0159.

## 2.2.2 *tert*-Butyl (*S*)-5-(((benzyloxy)carbonyl)amino)-2-bromopentanoate (**7**)

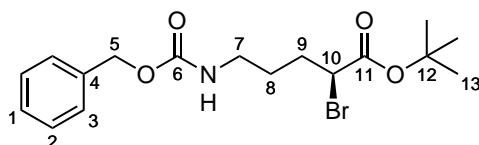

Compound **7** was synthesised following the modification of a literature procedure.<sup>18</sup> HClO<sub>4</sub> (70% w/w in H<sub>2</sub>O, 70  $\mu$ L, 0.81 mmol, 0.05 equiv.) was added to a solution of (*S*)-5-(((benzyloxy)carbonyl)amino)-2-bromopentanoic acid **6** (5.33 g, 15.1 mmol, 1.00 equiv.) in *tert*-butyl acetate (60.0 mL). The reaction mixture was stirred at room temperature for 18 hours. Diethyl ether (100 mL) and water (50 mL) were added to the reaction mixture. The organic phase was isolated and washed with a saturated aq. solution of Na<sub>2</sub>CO<sub>3</sub> until neutral pH is obtained. The organic layer was then dried over MgSO<sub>4</sub>, filtered and concentrated under reduced pressure. The residue was then purified by flash column chromatography (silica gel, Pet. ether/EtOAc, 2:1 v/v) to give compound **7** as a colourless oil (3.32 g, 8.60 mmol, 46% over 2 steps). **IR** ( $\nu_{\max}/\text{cm}^{-1}$ , *neat*): 3341, 2940, 1705, 1528, 1250, 1141, 741, 694. **R<sub>f</sub>** (Pet. ether/EtOAc v/v **70:30**): 0.42. **<sup>1</sup>H NMR** (400 MHz, CDCl<sub>3</sub>)  $\delta$  (ppm): 7.49–7.28 (5H, m, H<sup>1,2,3</sup>), 5.08 (2H, s,

H<sup>5</sup>), 4.12 (1H, t, <sup>3</sup>J = 7.2 Hz, H<sup>10</sup>), 3.22 (2H, app. q, <sup>3</sup>J = 6.7 Hz, H<sup>7</sup>), 2.15-1.80 (2H, m, H<sup>9</sup>), 1.75-1.50 (2H, m, H<sup>8</sup>), 1.46 (9H, s, H<sup>13</sup>). N-H signals are not observed. <sup>13</sup>C NMR (101 MHz, CDCl<sub>3</sub>) δ (ppm): 168.8 (C<sup>11</sup>), 156.5 (C<sup>6</sup>), 136.6 (C<sup>4</sup>), 128.7 (C<sup>2</sup>), 128.3 (C<sup>1</sup> & C<sup>3</sup>), 82.7 (C<sup>12</sup>), 66.9 (C<sup>5</sup>), 47.2 (C<sup>10</sup>), 40.3 (C<sup>7</sup>), 32.1 (C<sup>9</sup>), 27.9 (C<sup>13</sup> & C<sup>8</sup>). HRMS (ESI<sup>+</sup>, m/z): calculated for C<sub>17</sub>H<sub>24</sub><sup>79</sup>BrNNaO<sub>4</sub>, [M+Na]<sup>+</sup>:408.0781, found 408.0779.

### 2.2.3 Di-*tert*-butyl (*S*)-2-bromopentanedioate (**9**)

#### Part A - (*S*)-2-bromopentanedioic acid (**8**)

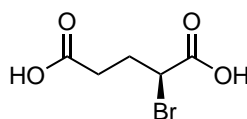

Compound **8** was synthesised following the modification of a literature procedure.<sup>19</sup> L-glutamic acid (9.21 g, 62.6 mmol, 1.00 equiv.) and KBr (22.4 g, 188 mmol, 3.00 equiv.) were dissolved in aq.HBr (1.00 M, 143 mL, 143 mmol, 2.30 equiv.) at room temperature. The reaction mixture was stirred for 5 minutes and cooled to −10 °C. A solution of NaNO<sub>2</sub> (10.8 g, 157 mmol, 2.50 equiv.) in water (15 mL) was added dropwise over 2 hours. After the addition, the reaction mixture was stirred at room temperature overnight. H<sub>2</sub>SO<sub>4</sub> (4.00 mL) was added slowly and the resulting aqueous solution was extracted with Et<sub>2</sub>O (3 × 100 mL). The combined organic layers were washed with brine (2 × 75 mL), dried over MgSO<sub>4</sub>, filtered and concentrated under reduced pressure. The crude residue (4.00 g) was used directly in the next step without further purification.

#### Part B - Di-*tert*-butyl(*S*)-2-bromopentanedioate (**9**)

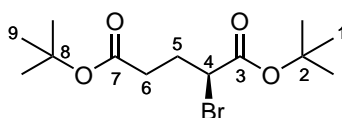

Compound **9** was synthesised following the modification of a literature procedure.<sup>19</sup> Aqueous HClO<sub>4</sub> (70% w/w, 125 μL, 1.42 mmol, 0.07 equiv.) was added to a solution of (*S*)-2-bromopentanedioic acid **8** (4.00 g, 19.0 mmol, 1.00 equiv.) in *tert*-butyl acetate (130 mL). The reaction mixture was stirred at room temperature overnight. Diethyl ether (100 mL) and water (50 mL) were added to the reaction mixture, the layers were separated and the organic phase was washed with a saturated aq. Na<sub>2</sub>CO<sub>3</sub> solution, until the pH was 7. The organic layer was then dried over MgSO<sub>4</sub>, filtered and concentrated under reduced pressure. The crude material was then purified by column chromatography (silica gel, pet.ether/EtOAc, 90:10 v/v) to give compound **9** (3.32 g, 10.3 mmol, 17% over 2 steps) as a clear viscous oil. IR (ν<sub>max</sub>/cm<sup>−1</sup>, neat): 2978, 1726,

1367, 1255, 1136, 843, 755.  $R_f$  (Pet.ether/EtOAc, v/v 90:10): 0.34.  $^1\text{H}$  NMR (400 MHz,  $\text{CDCl}_3$ )  $\delta$  (ppm): 4.24 (1H, dd,  $^3J = 8.4, 5.8$  Hz,  $\text{H}^4$ ), 2.46-2.36 (2H, m,  $\text{H}^6$ ), 2.27-2.16 (2H, m,  $\text{H}^5$ ), 1.49 (9H, s,  $\text{H}^1$ ), 1.46 (9H, s,  $\text{H}^9$ ).  $^{13}\text{C}$  NMR (101 MHz,  $\text{CDCl}_3$ )  $\delta$  (ppm): 171.5 ( $\text{C}^3$ ), 168.6 ( $\text{C}^7$ ), 82.6 ( $\text{C}^8$ ), 80.9 ( $\text{C}^2$ ), 47.0 ( $\text{C}^4$ ), 32.9 ( $\text{C}^5$ ), 30.0 ( $\text{C}^6$ ), 28.2 ( $\text{C}^1$ ), 27.8 ( $\text{C}^9$ ). HRMS (ESI $^+$ ,  $m/z$ ): calculated for  $\text{C}_{13}\text{H}_{24}^{79}\text{BrO}_4$ ,  $[\text{M}+\text{H}]^+$ : 345.0672, found 345.0671.

Spectral data were in accordance with that reported in the literature.<sup>19</sup>

### 2.3 Synthesis of $\text{Gd.L}_{1-3}$

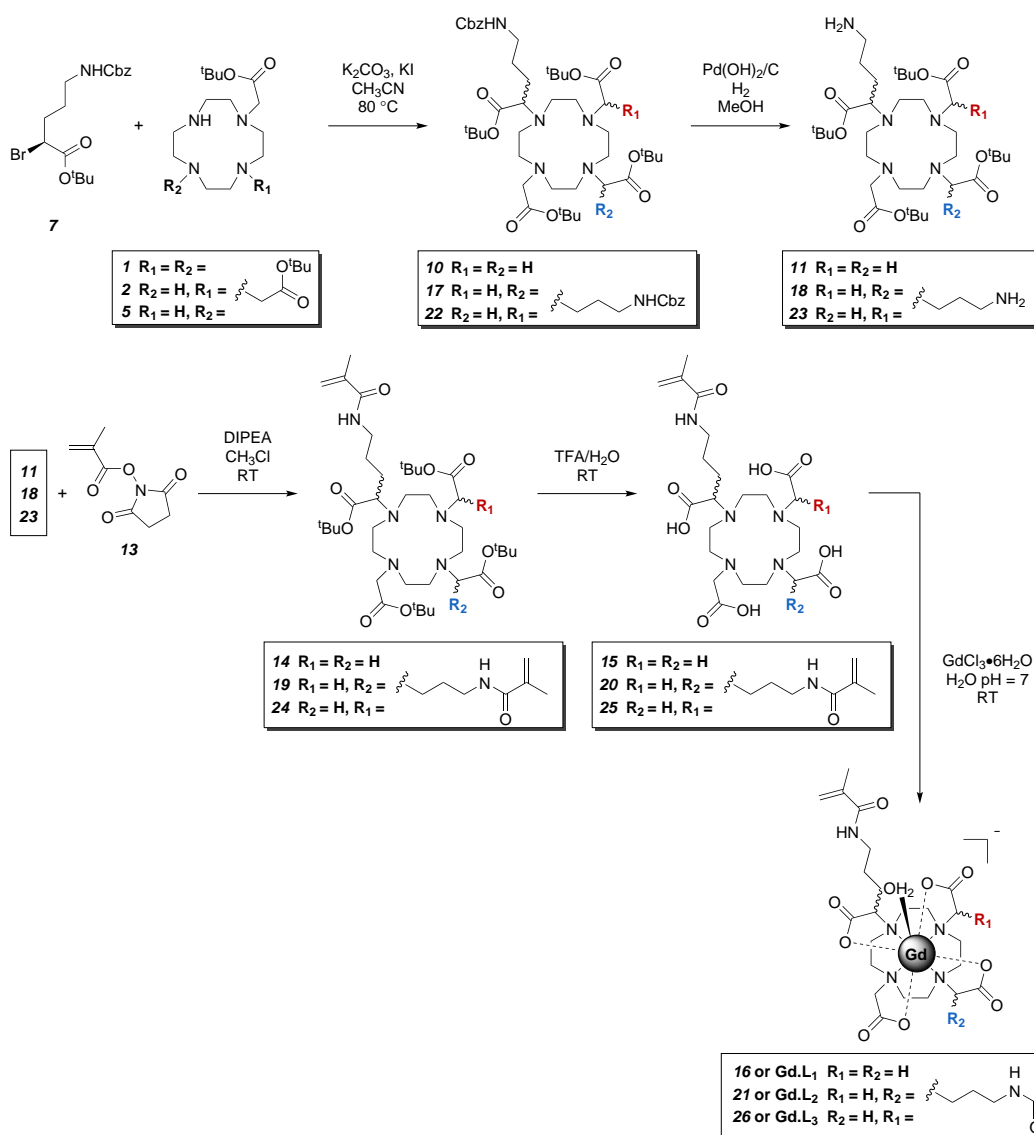

Scheme S3. Synthesis of  $\text{Gd.L}_{1-3}$ .

**2.3.1 Tri-*tert*-butyl 2,2',2''-(10-(5-(((benzyloxy)carbonyl)amino)-1-(*tert*-butoxy-1-oxopentan-2-yl)-1,4,7,10-tetraazacyclododecane-1,4,7-triyl)triacetate (10)**

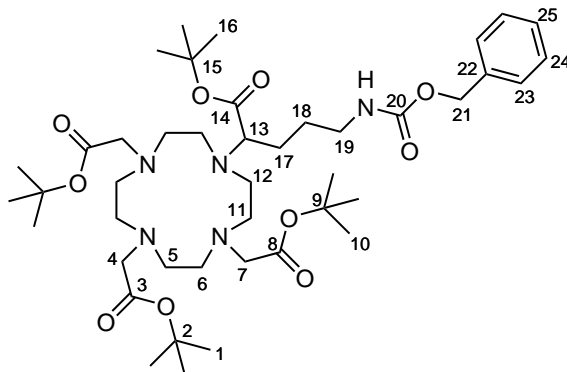

Compound **1** (700 mg, 1.36 mmol, 1.00 equiv.), K<sub>2</sub>CO<sub>3</sub> (568 mg, 4.08 mmol, 3.00 equiv.), KI (226 mg, 1.36 mmol, 1.00 equiv.) and compound **7** (1.05 g, 2.72 mmol, 2.00 equiv.) were suspended in anhydrous CH<sub>3</sub>CN (6.00 mL) and the reaction mixture was stirred at 80 °C overnight. The solids were removed by centrifugation and the supernatant was evaporated under reduced pressure. The crude residue was purified by flash column chromatography (silica gel, pure CH<sub>2</sub>Cl<sub>2</sub> to CH<sub>2</sub>Cl<sub>2</sub>/CH<sub>3</sub>OH, 96:4 v/v, with an increment of 1% and then to CH<sub>2</sub>Cl<sub>2</sub>/CH<sub>3</sub>OH, 92/8 v/v, with an increment of 2%) to afford compound **10** (907 mg, 1.10 mmol, 81%) as an amorphous yellow solid. **IR** ( $\nu_{\text{max}}$ /cm<sup>-1</sup>, neat): 3248, 2975, 2933, 2827, 1719, 1226, 1158. **R<sub>f</sub>** (CH<sub>2</sub>Cl<sub>2</sub>/CH<sub>3</sub>OH, 90:10 v/v): 0.36. **<sup>1</sup>H NMR** (400 MHz, CDCl<sub>3</sub>)  $\delta$  (ppm): 7.50-7.20 (5H, m, H<sup>23,24,25</sup>), 5.04 (2H, s, H<sup>21</sup>), 3.44-3.24 (4H, m, H<sup>4a,7a,13</sup>), 3.20-3.01 (4H, m, H<sup>19</sup> & CH<sub>2</sub> cyclen), 3.05-2.87 (2H, m, CH<sub>2</sub> cyclen), 2.85-2.65 (3H, m, H<sup>4b,7b</sup>), 2.60-2.00 (12H, m, 6 × CH<sub>2</sub> cyclen), 1.83 (1H, m, H<sup>18a</sup>), 1.68 (1H, m, H<sup>17a</sup>), 1.62-1.47 (2H, m, H<sup>17b,18b</sup>), 1.47-1.30 (36H, m, H<sup>1,10,16</sup>). N-H signals are not observed. **<sup>13</sup>C NMR** (101 MHz, CDCl<sub>3</sub>)  $\delta$  (ppm): 175.1 (C<sup>14</sup>), 172.9 (C<sup>8</sup>), 172.8 (C<sup>3</sup>), 156.7 (C<sup>20</sup>), 136.9 (C<sup>22</sup>), 128.5 (C<sup>23</sup> or C<sup>24</sup>), 128.0 (C<sup>24</sup> or C<sup>23</sup>), 127.9 (C<sup>25</sup>), 82.1 (C(CH<sub>3</sub>)<sub>3</sub>), 82.0 (C(CH<sub>3</sub>)<sub>3</sub>), 81.9 (C(CH<sub>3</sub>)<sub>3</sub>), 66.3 (C<sup>21</sup>), 61.1 (C<sup>13</sup>), 55.9, 55.8, 55.6 (NCH<sub>2</sub>COOtBu), 52.7, 52.5, 48.6, 48.2, 47.3, 43.9 (NCH<sub>2</sub>CH<sub>2</sub>N), 40.8 (C<sup>19</sup>), 29.8 (C<sup>18</sup>), 27.9(3), 27.9(1), 27.8(6) (CH<sub>3</sub>), 22.0 (C<sup>17</sup>). **HRMS** (ESI<sup>+</sup>, m/z): calculated for C<sub>43</sub>H<sub>73</sub>N<sub>5</sub>NaO<sub>10</sub>, [M+Na]<sup>+</sup>:842.5250, found 842.5256.

### 2.3.2 Tri-*tert*-butyl 2,2',2''-(10-(5-amino-1-(*tert*-butoxy)-1-oxopentan-2-yl)-1,4,7,10-tetraazacyclododecane-1,4,7-triyl)triacetate (11)

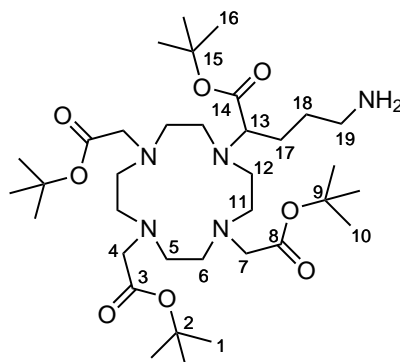

Product **10** (178 mg, 0.22 mmol, 1.00 equiv.) was dissolved in CH<sub>3</sub>OH (2 mL) and Pd(OH)<sub>2</sub> (30.5 mg, 22.0 μmol, 0.10 equiv.) was added. The reaction mixture was purged with N<sub>2</sub>. The inert atmosphere was replaced with H<sub>2</sub> and the reaction mixture was stirred for 48 hours at room temperature. The suspension was filtered through a pad of Celite® and rinsed with CH<sub>3</sub>OH. The filtrate was then pushed through a syringe filter (cut-off 220 nm) to remove the remaining catalyst nanoparticles. The solvent was removed under reduced pressure to yield compound **11** (128 mg, 0.19 mmol, 86%) as a yellow oil. **IR** ( $\nu_{max}/\text{cm}^{-1}$ , neat): 2979, 2828, 1720, 1453, 1366, 1226, 1156. **<sup>1</sup>H NMR** (400 MHz, CDCl<sub>3</sub>)  $\delta$  (ppm): 3.45-3.31 (4H, m, H<sup>4a,7a,13</sup>), 3.31-3.01 (4H, m, 2 × CH<sub>2</sub>), 2.92-2.73 (3H, m, H<sup>4b,7b</sup>), 2.68 (2H, app. dt, <sup>3</sup>*J* = 6.8, 2.5 Hz, H<sup>19</sup>), 2.60-2.00 (12H, m, 6 × CH<sub>2</sub>), 1.90-1.50 (4H, m, H<sup>17,18</sup>), 1.50-1.35 (36H, m, H<sup>1,10,16</sup>). N-H signals are not observed. **<sup>13</sup>C NMR** (101 MHz, CDCl<sub>3</sub>)  $\delta$  (ppm): 175.2 (C<sup>14</sup>), 172.9(8) (C<sup>8</sup> or C<sup>3</sup>), 172.8(9) (C<sup>3</sup> or C<sup>8</sup>), 82.1, 82.0, 81.9 (C(CH<sub>3</sub>)), 61.1 (C<sup>13</sup>), 55.9 (C<sup>7</sup> or C<sup>4</sup>), 55.6 (C<sup>4</sup> or C<sup>7</sup>), 52.8, 52.6, 48.8, 48.4, 47.4, 45.0 (CH<sub>2</sub> cyclen), 42.1 (C<sup>19</sup>), 33.4 (C<sup>18</sup>), 28.0, 27.9 (CH<sub>3</sub>), 22.2 (C<sup>17</sup>). **HRMS** (ESI<sup>+</sup>, *m/z*): calculated for C<sub>35</sub>H<sub>68</sub>N<sub>5</sub>O<sub>8</sub>, [M+H]<sup>+</sup>:686.5062, found 686.5076.

### 2.3.3 2,5-Dioxopyrrolidin-1-yl methacrylate or NMAS (13)

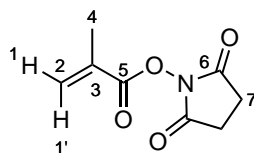

Compound **13** was synthesised following the modification of literature procedures.<sup>20–23</sup> A solution of EDC (11.7 g, 61.0 mmol, 1.05 equiv.) and DMAP (355 mg, 2.90 mmol, 0.05 equiv.) in CH<sub>2</sub>Cl<sub>2</sub> (25 mL) was added dropwise to a cold (0 °C) stirred solution of methacrylic acid (5.00 g, 58.1 mmol, 1.00 equiv.) and *N*-hydroxysuccinimide (8.02 g, 69.7 mmol, 1.20 equiv.) in CH<sub>2</sub>Cl<sub>2</sub> (100 mL) over 1 hour at 0 °C. After the reaction mixture was stirred at room temper-

ature for 24 hours. The reaction mixture was then washed with water ( $3 \times 100$  mL), dried over  $\text{MgSO}_4$ , filtered and concentrated. The residue was purified by flash column chromatography (silica gel,  $\text{CH}_2\text{Cl}_2/\text{THF}$ , 9:1 v/v) to give compound **13** as a white solid (9.81 g, 53.6 mmol, 92%). **IR** ( $\nu_{\text{max}}/\text{cm}^{-1}$ , neat): 2979, 1756, 1729, 1636, 1423, 1366, 1204, 1080, 980. **R<sub>f</sub>** ( $\text{CH}_2\text{Cl}_2$ ): 0.20. **<sup>1</sup>H NMR** (400 MHz,  $\text{CDCl}_3$ )  $\delta$  (ppm): 6.40 (1H, d,  $^2J = 0.8$  Hz,  $\text{H}^{1'}$ ), 5.88 (1H, d,  $^2J = 0.8$  Hz,  $\text{H}^1$ ), 2.84 (4H, s,  $\text{H}^7$ ), 2.04 (3H, s,  $\text{H}^4$ ). **<sup>13</sup>C NMR** (101 MHz,  $\text{CDCl}_3$ )  $\delta$  (ppm): 169.4 ( $\text{C}^6$ ), 162.3 ( $\text{C}^5$ ), 131.9 ( $\text{C}^3$ ), 130.6 ( $\text{C}^2$ ), 25.7 ( $\text{C}^7$ ), 18.3 ( $\text{C}^4$ ). **HRMS** (ESI<sup>+</sup>,  $m/z$ ): calculated for  $\text{C}_8\text{H}_9\text{NNaO}_4$ ,  $[\text{M}+\text{Na}]^+$ : 206.0424, found 206.0424.

Spectral data were in accordance with that reported in the literature.<sup>20–23</sup>

### 2.3.4 tri-*tert*-butyl 2,2',2''-(10-(1-(*tert*-butoxy)-5-methacrylamido-1-oxopentane-2-yl)-1,4,7,10-tetraazacyclododecane-1,4,7-triyl)triacetate (**14**)

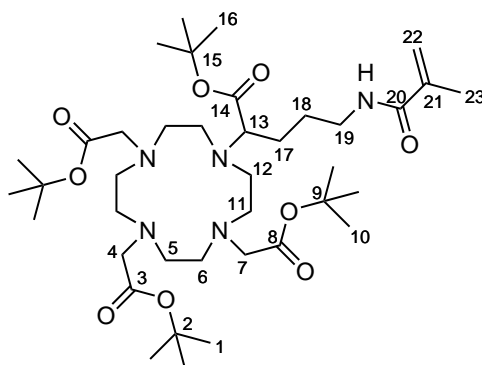

Compound **11** (334 mg, 0.49 mmol, 1.00 equiv.) and DIPEA (170  $\mu\text{L}$ , 0.98 mmol, 2.00 equiv.) were dissolved in  $\text{CHCl}_3$  (5.00 mL). The reaction mixture was stirred for 5 minutes at 40 °C, and a solution of activated ester **13** (93.6 mg, 0.51 mmol, 1.05 equiv.) in  $\text{CH}_2\text{Cl}_2$  (2.00 mL) was added dropwise over 2 hours. The reaction mixture was stirred at 40 °C for 3 hours and then at room temperature overnight. The solution was diluted with  $\text{CH}_2\text{Cl}_2$  (100 mL), water (95 mL) and a saturated solution of ammonium chloride (5 mL). The organic phase was separated, dried over  $\text{MgSO}_4$ , filtered and concentrated. The residue was then purified by flash column chromatography (silica gel, pure  $\text{CH}_2\text{Cl}_2$  to  $\text{CH}_2\text{Cl}_2/\text{CH}_3\text{OH}$ , 92:8 v/v with a 2% increment) to yield compound **14** (326 mg, 0.43 mmol, 89%) as a yellow amorphous solid. **IR** ( $\nu_{\text{max}}/\text{cm}^{-1}$ , neat): 3278, 2976, 2828, 1720, 1660, 1618, 1525, 1367, 1226. **R<sub>f</sub>** ( $\text{CH}_2\text{Cl}_2/\text{CH}_3\text{OH}$  v/v 90:10): 0.38. **<sup>1</sup>H NMR** (400 MHz,  $\text{CDCl}_3$ )  $\delta$  (ppm): 5.86 (1H, s,  $\text{H}^{22}$ ), 5.28 (1H, s,  $\text{H}^{22'}$ ), 3.60–3.10 (6H, m,  $\text{H}^{4a,7a,13,19}$ ), 3.10–2.90 (2H, m,  $\text{CH}_2$  ring), 2.90–2.60 (5H, m,  $\text{H}^{4b,7b}$  &  $\text{CH}_2$  cyclen), 2.60–2.00 (12H, m,  $6 \times \text{CH}_2$  cyclen), 1.98 (3H, s,  $\text{H}^{23}$ ), 1.95–1.5 (4H, m,  $\text{H}^{17,18}$ ), 1.42 (36H, app. s,  $\text{H}^{1,10,16}$ ). N-H signals are not observed. **<sup>13</sup>C NMR** (101 MHz,  $\text{CDCl}_3$ )  $\delta$  (ppm): 175.4 ( $\text{C}^{14}$ ), 173.0, 172.8, 172.7 ( $\text{CH}_2\text{CO}$ ), 169.1 ( $\text{C}^{20}$ ), 139.9 ( $\text{C}^{21}$ ), 120.1 ( $\text{C}^{22}$ ), 82.1, 82.0, 81.9 ( $\text{C}(\text{CH}_3)$ ), 61.4 ( $\text{C}^{13}$ ), 55.9 ( $\text{C}^7$ ), 55.6 ( $\text{C}^4$ ), 52.8, 52.6, 48.6, 48.3, 47.4, 44.8 ( $\text{CH}_2$  cyclen),



39.4 (C<sup>19</sup>), 29.5 (C<sup>18</sup>), 27.9 (C<sup>1,10,16</sup>), 22.8 (C<sup>17</sup>), 19.4 (C<sup>23</sup>). **HRMS (ESI<sup>+</sup>, m/z):** calculated for C<sub>39</sub>H<sub>72</sub>N<sub>5</sub>O<sub>9</sub>, [M+H]<sup>+</sup>:754.5325, found 754.5300.

### 2.3.5 2,2',2''-(10-(1-Carboxy-4-methacrylamidobutyl)-1,4,7,10-tetraazacyclo-dodecane-1,4,7-triyl)triacetic acid (15)

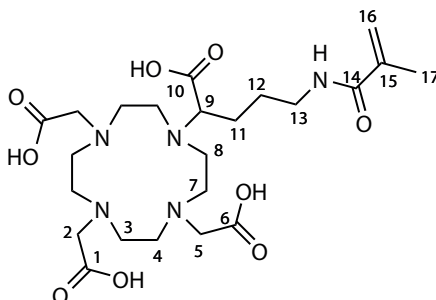

Compound **14** (125 mg, 0.16 mmol, 1.00 equiv.) was dissolved in TFA (5 mL) and H<sub>2</sub>O (0.5 mL) and stirred for 3 days at room temperature until complete deprotection (determined by LC-MS). The reaction mixture was concentrated under reduced pressure and residual TFA was removed by successive co-evaporations with CH<sub>2</sub>Cl<sub>2</sub> (5 × 20 mL). The resulting residue was suspended in deionised water, centrifuged twice, and filtrated through a syringe filter (220 nm cut-off), and purified by reverse phase HPLC [gradient system A: H<sub>2</sub>O (0.1% v/v HCOOH)/CH<sub>3</sub>CN (0.1% v/v HCOOH)]. The fractions containing the product were combined and lyophilised to yield compound **15** (52.4 mg, 98.9 μmol, 59%) as a white amorphous solid. **IR** ( $\nu_{max}/\text{cm}^{-1}$ , neat): 3273, 3077, 1588, 1383, 1315, 1084. **<sup>1</sup>H NMR (500 MHz, D<sub>2</sub>O)  $\delta$  (ppm):** 5.75 (1H, s, H<sup>16</sup>), 5.49 (1H, s, H<sup>16'</sup>), 4.02 (1H, dd, <sup>3</sup>J = 10.0, 3.1 Hz, H<sup>9</sup>), 3.96-3.80 (4H, m, H<sup>5</sup>), 3.80-3.60 (2H, m, H<sup>2</sup>), 3.60-3.36 (8H, m, 4 × CH<sub>2</sub> cyclen), 3.32 (2H, t, <sup>3</sup>J = 6.3 Hz, H<sup>13</sup>), 3.28-2.90 (8H, m, 4 × CH<sub>2</sub> cyclen), 1.99 (3H, s, H<sup>17</sup>), 1.91-1.80 (1H, m, H<sup>11a</sup>), 1.80-1.60 (3H, m, H<sup>11b,12</sup>). O-H and N-H signals are not observed. **HRMS (ESI<sup>+</sup>, m/z):** calculated for C<sub>23</sub>H<sub>40</sub>N<sub>5</sub>O<sub>9</sub>, [M+H]<sup>+</sup>:530.2821, found 530.2831. **HPLC [gradient system B, H<sub>2</sub>O (0.1% v/v HCOOH)/CH<sub>3</sub>CN(0.1% v/v HCOOH)]:**  $t_R$  = 2.3 minutes.

### 2.3.6 Gadolinium(III) (2,2',2''-(10-(1-carboxylato-4-methacrylamido-butyl)1,4-7,10-tetraazacyclododecane-1,4,7-triyl)triacetate) (16)

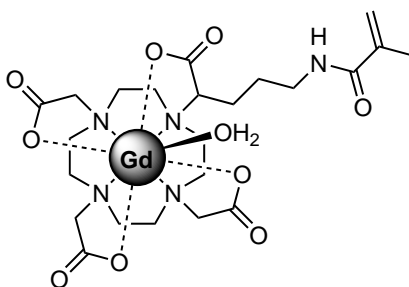

Deprotected ligand **15** (77.0 mg, 0.15 mmol, 1.00 equiv.) and gadolinium(III) chloride hexahydrate (60.0 mg, 0.16 mmol, 1.10 equiv.) were stirred in deionized water (10.0 mL) at room temperature for 24 hours. Over the course of the reaction, pH was adjusted to 7 by addition of aq. HCl or aq. NaOH. The reaction mixture was lyophilised and the resulting solid was dissolved in deionised water, centrifuged, filtered through a syringe filter (220 nm cut-off) and purified by preparative HPLC [gradient system A: H<sub>2</sub>O [25 mmol NH<sub>4</sub>HCO<sub>3</sub>]/CH<sub>3</sub>CN (see section 2.5)]. The fractions containing the product were combined to yield, after lyophilisation, compound **16** (52.6 mg, 77.0  $\mu$ mol, 51.4%) as a white amorphous solid. **IR** ( $\nu_{\text{max}}/\text{cm}^{-1}$ , **neat**): 3273, 2981, 2920, 2865, 1586, 1382, 1316, 1084. **HRMS** (ESI<sup>-</sup>, **m/z**): calculated for C<sub>23</sub>H<sub>35</sub><sup>158</sup>GdN<sub>5</sub>O<sub>9</sub>, [M]<sup>-</sup>:683.1671, found 683.1661. **HPLC** [gradient system B, H<sub>2</sub>O (25 mM NH<sub>4</sub>HCO<sub>3</sub>)/CH<sub>3</sub>CN]:  $t_R$  = 5.70 minutes. **Relaxivity** (H<sub>2</sub>O, 60 MHz, pH = 7.4, 37 °C):  $r_1$  = 4.8 mM<sup>-1</sup>s<sup>-1</sup>.

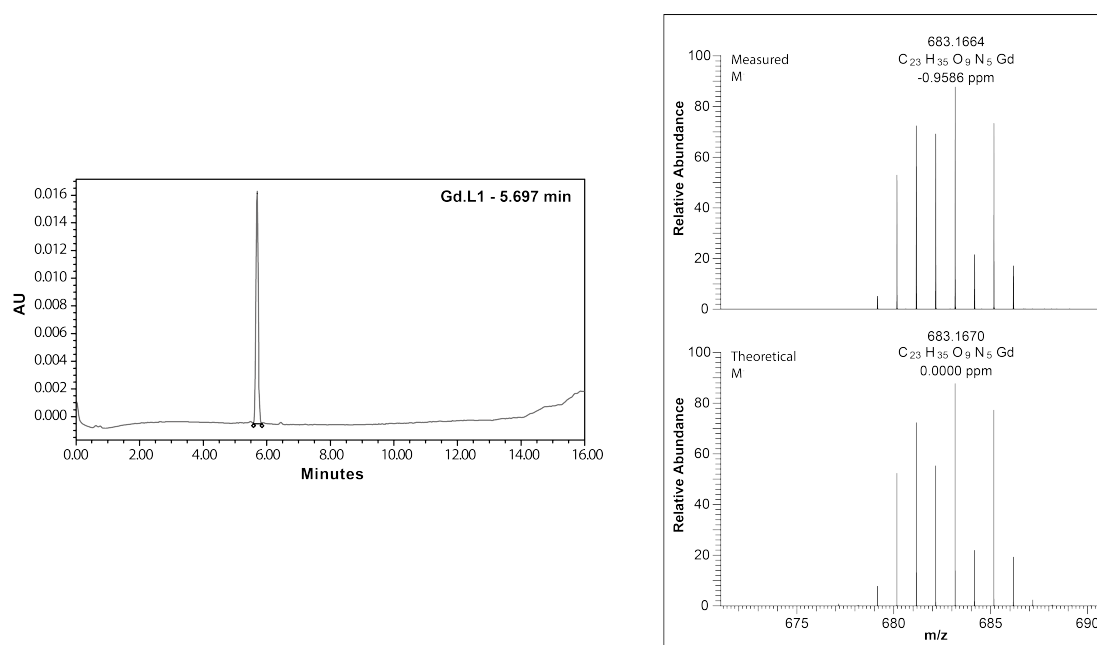

**Figure S1.** HPLC trace and HRMS spectra of **Gd.L<sub>1</sub>**.

**2.3.7 Di-*tert*-butyl-2,2'-(4,10-bis(2-(*tert*-butoxy)-2-oxoethyl)-1,4,7,10-tetraaza-cyclododecane-1,7-diyl)bis(5-(((benzyloxy)carbonyl)amino)pentanoate)**  
(17)

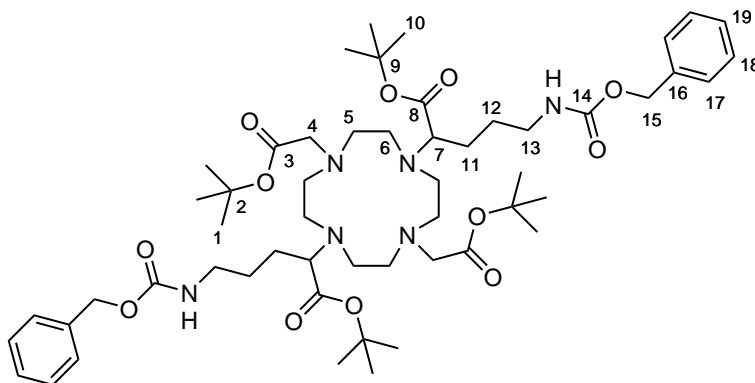

Compound **5** (800 mg, 2.00 mmol, 1.00 equiv.),  $K_2CO_3$  (1.66 g, 12.0 mmol, 6.00 equiv.), compound **7** (2.01 g, 5.20 mmol, 2.60 equiv.), and potassium iodide (663 mg, 4.00 mmol, 2.00 equiv.) were dissolved in anhydrous  $CH_3CN$  (10.0 mL), and the reaction mixture was stirred at 80 °C overnight. Potassium salts were removed by centrifugation, and the supernatant was concentrated under reduced pressure to obtain a yellow oil. The crude material was then purified by flash column chromatography (silica gel, pure  $CH_2Cl_2$  to  $CH_2Cl_2/CH_3OH$ , 92:8 v/v, with an increment of 2%) to yield compound **17** (1.76 mg, 1.74 mmol, 87%) as a yellow solid. **IR** ( $\nu_{max}/cm^{-1}$ , neat): 3254, 2975, 2933, 2837, 1711, 1517, 1227, 1154, 1113.  **$R_f$**  ( $CH_2Cl_2/CH_3OH$ , v/v 90:10): 0.32.  **$^1H$  NMR** (400 MHz,  $CDCl_3$ )  $\delta$  (ppm): 7.40-7.26 (10H, m,  $H^{17,18,19}$ ), 5.06 (4H, s,  $H^{15}$ ), 3.42 (2H, d,  $^2J = 17.1$  Hz,  $H^{4A}$ ), 3.32 (2H, m,  $H^7$ ), 3.19 (4H, m,  $H^{13}$ ), 3.07 (2H, app. t,  $J^{app} = 13.3$  Hz,  $CH_2$  cyclen), 2.94 (2H, app. t,  $J^{app} = 13.3$  Hz,  $CH_2$  cyclen), 2.76 (2H, d,  $^2J = 17.1$  Hz,  $H^{4B}$ ), 2.65-2.25 (8H, m, 4  $\times$   $CH_2$  cyclen), 2.20 (2H, app. d,  $J^{app} = 13.3$  Hz,  $CH_2$  cyclen), 2.08 (2H, app.d,  $J^{app} = 13.3$  Hz,  $CH_2$  cyclen), 1.86 (2H, m,  $H^{12a}$ ), 1.69 (2H, m,  $H^{11a}$ ), 1.53-1.65 (4H, m,  $H^{11b,12b}$ ), 1.53-1.30 (36H, m,  $H^{1,10}$ ). N-H signals are not observed.  **$^{13}C$  NMR** (101 MHz,  $CDCl_3$ )  $\delta$  (ppm): 174.9 ( $C^8$ ), 172.9 ( $C^3$ ), 156.6 ( $C^{14}$ ), 136.8 ( $C^{16}$ ), 128.5, 128.0 (CH CBz benzyl ring), 82.1, 81.9 ( $C(CH_3)_3$ ), 66.4 ( $C^{15}$ ), 61.0 ( $C^7$ ), 56.0 ( $C^4$ ), 52.7, 48.8, 47.3, 44.6 ( $CH_2$  cyclen), 40.8 ( $C^{13a}$ ), 40.7 ( $C^{13b}$ ), 29.8 ( $C^{12}$ ), 28.3, 28.2, 27.9, ( $CH_3$ ), 22.0 ( $C^{11}$ ). **HRMS** (ESI<sup>+</sup>, m/z): calculated for  $C_{54}H_{86}N_6NaO_{12}$ ,  $[M+Na]^+$ : 1033.6196, found 1033.6189.

### 2.3.8 Di-*tert*-butyl-2,2'-(4,10-bis(2-(*tert*-butoxy)-2-oxoethyl)-1,4,7,10-tetraazacyclododecane-1,7-diyl)bis(5-aminopentanoate) (18)

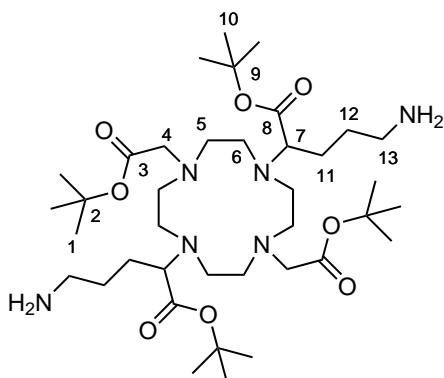

Compound **17** (50.0 mg, 0.49 mmol, 1.00 equiv.) and Pd(OH)<sub>2</sub> (10.0 mg, 74  $\mu$ mol, 0.15 equiv.) were dissolved in CH<sub>3</sub>OH (1.50 mL) at room temperature. The reaction mixture was purged with N<sub>2</sub> and the inert atmosphere was replaced with H<sub>2</sub>. The reaction mixture was stirred overnight at room temperature and the catalyst was removed by filtration through a pad of Celite® and rinsed with CH<sub>3</sub>OH. The resulting solution was filtered through a syringe filter (220 nm cut-off) and the filtrate was concentrated under reduced pressure to yield compound **18** (35.0 mg, 0.47 mmol, 95%) as a yellow oil. **IR** ( $\nu_{max}/\text{cm}^{-1}$ , neat): 3368, 2977, 2932, 2844, 1718, 1577, 1455, 1367, 1227, 1155. **<sup>1</sup>H NMR (400 MHz, CDCl<sub>3</sub>)  $\delta$  (ppm):** 3.41 (2H, d, <sup>2</sup>*J* = 17.3 Hz, H<sup>4a</sup>), 3.37-3.33 (2H, m, H<sup>7</sup>), 3.22 (2H, app. t, *J* = 13.4 Hz, CH<sub>2</sub> cyclen), 2.92 (2H, app. t, *J* = 13.0 Hz, CH<sub>2</sub> cyclen), 2.75 (2H, d, <sup>2</sup>*J* = 17.3 Hz, H<sup>4b</sup>), 2.67 (4H, m, H<sup>13</sup>), 2.57-2.31 (8H, m, 4  $\times$  CH<sub>2</sub> cyclen), 2.26 (2H, app. d, *J* = 13.6 Hz, CH<sub>2</sub> cyclen), 2.09 (2H, app. d, *J* = 14.0 Hz, CH<sub>2</sub> cyclen), 1.90-1.53 (8H, m, H<sup>11,12</sup>), 1.50-1.35 (36H, m, H<sup>1,10</sup>). N-H signals are not observed. **<sup>13</sup>C NMR (101 MHz, CDCl<sub>3</sub>)  $\delta$  (ppm):** 174.8 (C<sup>8</sup>), 174.0 (C<sup>8'</sup>), 173.2 (C<sup>3</sup>), 172.7 (C<sup>3'</sup>), 83.0, 82.3, 81.8, 81.7 (C(CH<sub>3</sub>)<sub>3</sub>), 61.0 (C<sup>7</sup>), 56.3, 55.9, 55.8 (NCH<sub>2</sub>CO), 52.6, 48.7, 47.1, 46.9, 44.5 (CH<sub>2</sub> cyclen), 41.7 (C<sup>13</sup>), 32.9 (C<sup>12</sup>), 28.1, 27.7, 27.6 (CH<sub>3</sub>), 22.1 (C<sup>11</sup>). **HRMS (ESI<sup>+</sup>, m/z):** calculated for C<sub>38</sub>H<sub>75</sub>N<sub>6</sub>O<sub>8</sub>, [M+H]<sup>+</sup>: 743.5641, found 743.5648.

### 2.3.9 Gadolinium(III) (2,2'-(4,10-bis(carboxylatomethyl)-1,4,7,10-tetraazacyclododecane-1,7-diyl)bis(5-methacrylamidopentanoate)) (21)

**Part A** - Di-*tert*-butyl-2,2'-(4,10-bis(2-(*tert*-butoxy)-2-oxoethyl)-1,4,7,10-tetraazacyclododecane-1,7-diyl)bis(5-methacrylamidopentanoate) (**19**)

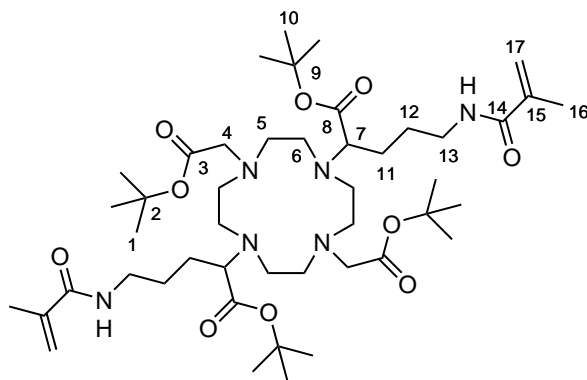

Bis-amine **18** (540 mg, 0.73 mmol, 1.00 equiv.) was dissolved in DMF (2.00 mL) at room temperature. DIPEA (506  $\mu$ L, 2.91 mmol, 4.00 equiv.) and **13** (NHS-methacrylate) (280 mg, 1.53 mmol, 2.10 equiv.) were added. The reaction mixture was stirred at 30 °C overnight under an atmosphere of N<sub>2</sub>. The solvent was evaporated and the residue was dissolved with CH<sub>2</sub>Cl<sub>2</sub> (40.0 mL). The organic phase was washed with a mixture of water (20.0 mL) and a saturated solution of NH<sub>4</sub>Cl (2.00 mL), dried over MgSO<sub>4</sub>, filtered and concentrated. The desired compound was not stable on silica gel and therefore the product was used directly in the next step with no further purification. **IR** ( $\nu_{\text{max}}/\text{cm}^{-1}$ , *neat*): 3257, 2976, 2929, 2852, 1716, 1656, 1615, 1533, 1227, 1151. **HRMS** (ESI<sup>+</sup>, *m/z*): calculated for C<sub>54</sub>H<sub>86</sub>N<sub>6</sub>NaO<sub>12</sub>, [M+Na]<sup>+</sup>:901.5985, found 901.5971.

**Part B** - 2,2'-(4,10-Bis(carboxymethyl)-1,4,7,10-tetraazacyclododecane-1,7-diyl)bis-(5-methacrylamidopentanoic acid) (**20**)

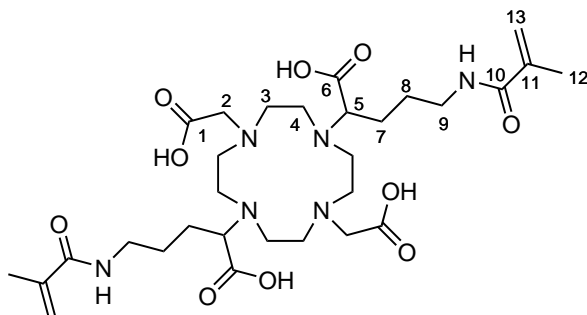

Ligand **19** (600 mg, 0.68 mmol, 1.00 equiv.) was dissolved in TFA (10.0 mL) and H<sub>2</sub>O (1.00 mL) and was stirred for 3 days at room temperature until complete deprotection (LC-MS monitoring). The reaction mixture was concentrated under reduced pressure and residual TFA was removed by successive co-evaporations with CH<sub>2</sub>Cl<sub>2</sub> (5  $\times$  20 mL). The resulting residue was dissolved in deionised water, centrifuged twice, and the supernatant filtered through a syringe filter (cut-off of 220 nm), and the filtrate was lyophilised to afford **20** (354 mg) as a white solid. The crude product was directly used in the next step with no further purification. **HRMS** (ESI<sup>+</sup>, *m/z*): calculated for C<sub>30</sub>H<sub>50</sub>N<sub>6</sub>NaO<sub>10</sub>, [M+Na]<sup>+</sup>:655.3631, found 655.3680.

**Part C - Gadolinium(III) (2,2'-(4,10-bis(carboxylatomethyl)-1,4,7,10-tetraazacyclododecane-1,7-diyl)bis(5-methacrylamidopentanoate)) (21)**

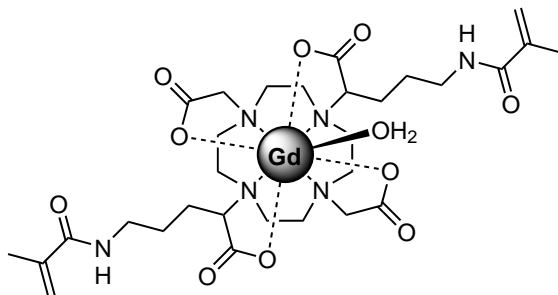

Deprotected ligand **20** (354 mg, 0.54 mmol, 1.00 equiv.) and gadolinium(III) chloride hexahydrate (221 mg, 0.60 mmol, 1.10 equiv.) were stirred in deionized water (10.0 mL) for 24 hours at room temperature. Over the course of the reaction, the pH was adjusted to 7 by addition of aq. HCl or aq. NaOH. The reaction mixture was lyophilised and the resulting solid was redissolved in deionised water, and centrifuged twice, the supernatant was filtered through a syringe filter (220 nm cut-off) and purified by preparative HPLC [gradient system B: H<sub>2</sub>O (25 mM NH<sub>4</sub>HCO<sub>3</sub>)/CH<sub>3</sub>CN (see section 2.5)]. The fractions containing the product were combined to yield, after lyophilisation, compound **21** (103 mg, 128  $\mu$ mol, overall yield 24% over 3 steps) as a white powder. **IR** ( $\nu_{\max}/\text{cm}^{-1}$ , neat): 3286, 2980, 2866, 1592, 1389. **HRMS** (ESI<sup>+</sup>,  $m/z$ ): calculated for C<sub>30</sub>H<sub>46</sub><sup>158</sup>GdN<sub>6</sub>O<sub>10</sub>, [M]<sup>+</sup>:808.2511, found 808.2543. **HPLC** [gradient system B, H<sub>2</sub>O (25 mM NH<sub>4</sub>HCO<sub>3</sub>)/CH<sub>3</sub>CN]:  $t_R$  = 5.350 minutes. **Relaxivity** (H<sub>2</sub>O, 60 MHz, pH = 7.4, 37 °C):  $r_1$  = 5.8 mM<sup>-1</sup>s<sup>-1</sup>.

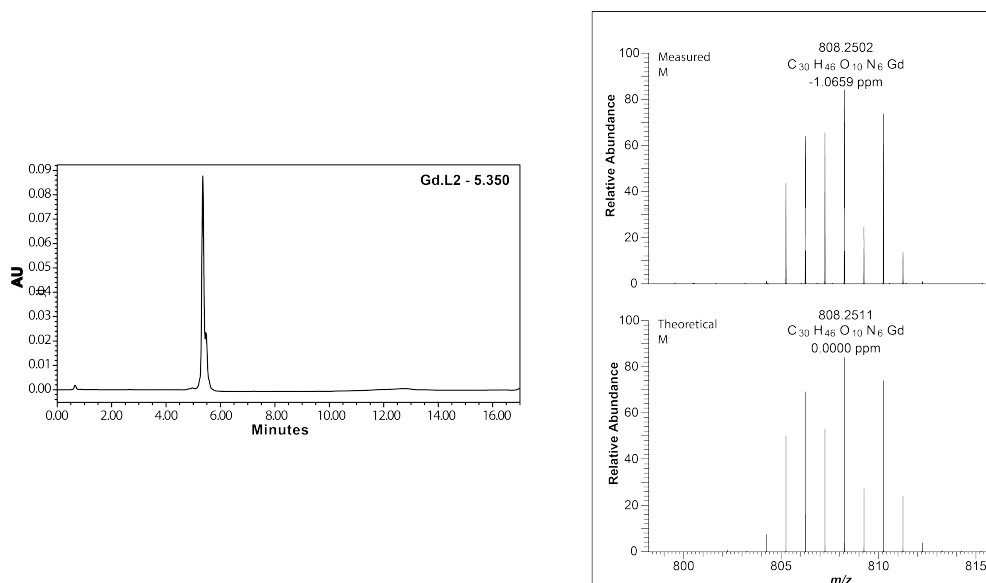

**Figure S2.** HPLC trace and HRMS spectra of **Gd.L<sub>2</sub>**.

**2.3.10 Di-*tert*-butyl-2,2'-(7,10-bis(2-(*tert*-butoxy)-2-oxoethyl)-1,4,7,10-tetraaza-cyclododecane-1,4-diyl)bis(5-(((benzyloxy)carbonyl)amino)pentanoate)**  
(**22**)

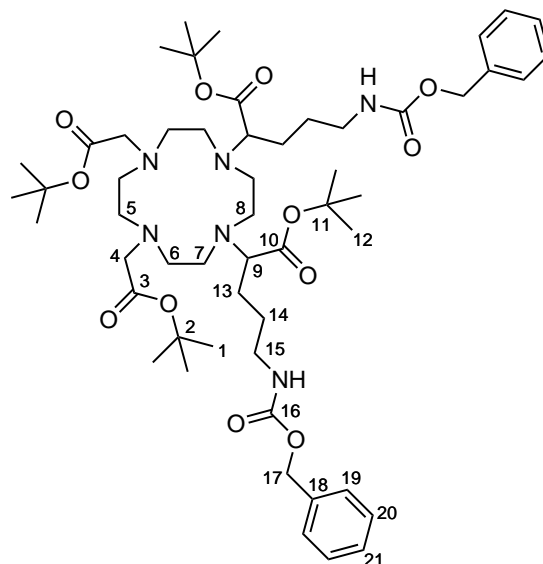

Compound **2** (600 mg, 1.50 mmol, 1.00 equiv.),  $K_2CO_3$  (1.24 g, 9.00 mmol, 6.00 equiv.), KI (497 mg, 3.00 mmol, 2.00 equiv.) and compound **7** (1.74 g, 4.50 mmol, 3.00 equiv.) were suspended in anhydrous  $CH_3CN$  (5.00 mL) and the reaction mixture was stirred overnight at 80 °C. Solids were removed by centrifugation and the supernatant was concentrated under reduced pressure. The crude material was then purified by column chromatography (silica gel, pure  $CH_2Cl_2$  to  $CH_2Cl_2/CH_3OH$ , 96:4 v/v, with an increment of 1% and then to  $CH_2Cl_2/CH_3OH$ , 88:12 v/v, with an increment of 2%) to yield compound **22** (1.30 g, 1.29 mmol, 86%) as a yellowish amorphous solid. **IR** ( $\nu_{max}/cm^{-1}$ , *neat*): 3256, 2979, 2931, 2851, 1711, 1517, 1453, 1366, 1228, 1156.  **$^1H$  NMR (400 MHz,  $CDCl_3$ )  $\delta$  (ppm):** 7.50-7.20 (10H, m,  $H^{19,20,21}$ ), 5.07 (4H, s,  $H^{17}$ ), 3.45-3.27 (4H, m,  $H^{4a,9}$ ), 3.16 (4H, m,  $H^{15}$ ), 3.12-2.84 (4H, m, 2  $\times$   $CH_2$  cyclen), 2.76 (1H, d,  $^2J = 17.1$  Hz,  $H^{4b}$ ), 2.73 (1H, d,  $^2J = 17.1$  Hz,  $H^{4b'}$ ), 2.60-2.00 (12H, m, 6  $\times$   $CH_2$  cyclen), 1.97-1.78 (2H, m,  $H^{14a}$ ), 1.76-1.50 (6H, m,  $H^{13a,13b,14b}$ ), 1.40 (36H, m,  $H^{1,12}$ ). N-H signals are not observed.  **$^{13}C$  NMR (101 MHz,  $CDCl_3$ )  $\delta$  (ppm):** 175.0 ( $C^{10}$ ), 172.8 ( $C^3$ ), 156.6 ( $C^{16}$ ), 136.8 ( $C^{18}$ ), 136.7 ( $C^{18'}$ ), 128.5, 128.0, 127.9 (CH Cbz benzene ring), 82.2, 82.1, 82.0, 81.9 ( $C(CH_3)_3$ ), 66.5 ( $C^{17}$ ), 66.4 ( $C^{17'}$ ), 62.2 ( $C^9$ ), 61.3 ( $C^{9'}$ ), 55.8 ( $C^4$ ), 55.7 ( $C^{4'}$ ), 52.6, 52.5, 48.6, 47.5, 47.4, 44.9, 44.8 ( $CH_2$  cyclen), 40.8 ( $C^{15}$ ), 40.6 ( $C^{15'}$ ), 29.9 ( $C^{14}$ ), 29.8 ( $C^{14'}$ ), 28.2, 28.0, 27.9, 27.8 ( $C^{1,12,1',12'}$ ), 21.7, 21.6 ( $C^{13,13'}$ ). **HRMS (ESI $^+$ ,  $m/z$ ):** calculated for  $C_{54}H_{86}N_6NaO_{12}$ ,  $[M+Na]^+$ : 1033.6196, found 1033.6193.

**2.3.11 Di-*tert*-butyl-2,2'-(7,10-bis(2-(*tert*-butoxy)-2-oxoethyl)-1,4,7,10-tetraaza-cyclododecane-1,4-diyl)bis(5-aminopentanoate) (23)**

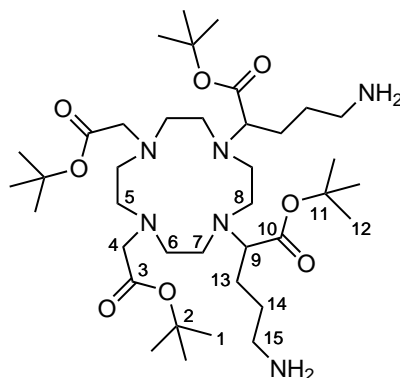

Compound **22** (1.30 g, 1.29 mmol, 1.00 equiv.) was dissolved in CH<sub>3</sub>OH (10.0 mL) and Pd(OH)<sub>2</sub> (542 mg, 0.39 mmol, 0.30 equiv.) was added. The reaction mixture was purged with N<sub>2</sub> and replaced with H<sub>2</sub>. The reaction mixture was stirred under an atmosphere of H<sub>2</sub> at room temperature for 72 hours. The catalyst was removed by filtration through a very large pad of Celite<sup>®</sup> (two successive filtrations were required). The filtrate was concentrated *in vacuo* to approximately 10 mL, filtered again through a syringe filter (220 nm cut-off) and concentrated under reduced pressure to yield compound **23** (925 mg, 1.25 mmol, 97%) as a yellow oil. **IR** ( $\nu_{max}/\text{cm}^{-1}$ , *neat*): 3413, 2979, 2931, 1716, 1366, 1226, 1151. **<sup>1</sup>H NMR (400 MHz, CDCl<sub>3</sub>)**  $\delta$  (**ppm**): 3.50-3.31 (4H, m, H<sup>4a,4a',9</sup>), 3.31-3.00 (4H, m, 2  $\times$  CH<sub>2</sub> cyclen), 2.81 (1H, d, <sup>2</sup>*J* = H<sup>4b</sup>), 2.77 (1H, d, <sup>2</sup>*J* = H<sup>4b'</sup>), 2.74-2.60 (4H, m, H<sup>15</sup>), 2.60-2.00 (12H, m, 6  $\times$  CH<sub>2</sub> cyclen), 1.90-1.50 (8H, m, H<sup>13,14</sup>), 1.30-1.50 (36H, m, H<sup>1,12</sup>). N-H signals are not observed. **<sup>13</sup>C NMR (101 MHz, CDCl<sub>3</sub>)**  $\delta$  (**ppm**): 175.3 (C<sup>10</sup>), 173.0 (C<sup>3'</sup>), 172.9 (C<sup>3'</sup>), 82.6, 82.0, 81.9, 81.8 (C(CH<sub>3</sub>)<sub>3</sub>), 61.6 (C<sup>9</sup>), 55.9 (C<sup>4</sup>), 52.7, 52.5, 48.7, 47.6, 47.4, 45.1 (CH<sub>2</sub> cyclen), 42.2 (C<sup>15</sup>), 33.7 (C<sup>14</sup>), 33.6 (C<sup>14'</sup>), 28.3, 28.0, 27.9 (CH<sub>3</sub>), 21.9 (C<sup>13</sup>). **HRMS (ESI<sup>+</sup>, *m/z*)**: calculated for C<sub>38</sub>H<sub>75</sub>N<sub>6</sub>O<sub>8</sub>, [M+H]<sup>+</sup>: 743.5641, found 743.5640.



**2.3.12 Di-*tert*-butyl-2,2'-(7,10-bis(2-(*tert*-butoxy)-2-oxoethyl)-1,4,7,10-tetraaza-cyclododecane-1,4-diyl)bis(5-methacrylamidopentanoate) (24)**

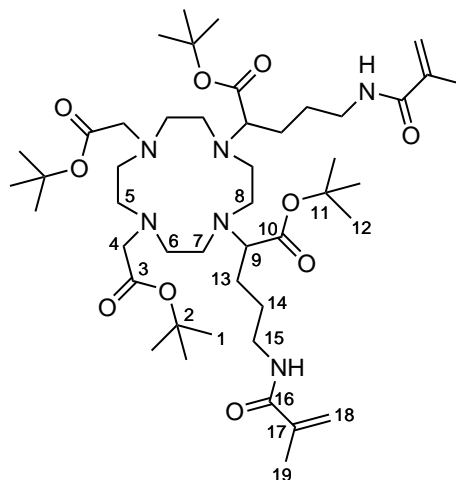

Compound **23** (800 mg, 1.08 mmol, 1.00 equiv.) and DIPEA (751  $\mu\text{L}$ , 4.31 mmol, 4.00 equiv.) were dissolved in  $\text{CH}_3\text{Cl}$  (5.00 mL). The reaction mixture was stirred for 5 minutes at 40  $^\circ\text{C}$ , and a solution of activated ester **13** (414 mg, 2.26 mmol, 2.10 equiv.) in  $\text{CH}_3\text{Cl}$  (5.00 mL) was added dropwise over a period of 2 hours. The reaction mixture was stirred at 40  $^\circ\text{C}$  for 3 hours and then at room temperature overnight. Volatiles were evaporated under reduced pressure and the residue was dissolved in with  $\text{CH}_2\text{Cl}_2$  (100 mL). The organic phase was washed with a mixture of water and saturated aq.  $\text{NH}_4\text{Cl}$  (100 mL, 95:5) solution, then dried over  $\text{MgSO}_4$ , filtered and concentrated. The residue was purified by flash column chromatography (silica gel, pure  $\text{CH}_2\text{Cl}_2$  to  $\text{CH}_2\text{Cl}_2/\text{CH}_3\text{OH}$ , 92:8 v/v with a 2% increment) to yield compound **24** (373 mg, 0.42 mmol, 40%) as a yellow amorphous solid. Due to the loss of product during purification, if this reaction was to be repeated, we advise to not purify the product by column chromatography and use it directly after the aqueous work-up in the following step. **IR** ( $\nu_{\text{max}}/\text{cm}^{-1}$ , neat): 3329, 2979, 2934, 2827, 1717, 1656, 1532, 1454, 1367, 1225, 1151, 1031.  **$^1\text{H}$  NMR (400 MHz,  $\text{CDCl}_3$ )  $\delta$  (ppm):** 5.90-5.70 (2H, m,  $\text{H}^{18}$ ), 5.35-5.20 (2H, m,  $\text{H}^{18'}$ ), 3.55-3.15 (8H, m,  $\text{H}^{4a,4a',9,15}$ ), 2.00-3.05 (18H, m,  $\text{H}^{4b,4b',5,6,7,8}$ ), 2.00-1.85 (6H, m,  $\text{H}^{19,19'}$ ), 1.85-1.50 (8H, m,  $\text{H}^{13,14}$ ), 1.50-1.30 (36H, m,  $\text{H}^{1,12}$ ). N-H are not observed.  **$^{13}\text{C}$  NMR (101 MHz,  $\text{CDCl}_3$ )  $\delta$  (ppm):** 175.5 ( $\text{C}^{10}$ ), 175.2 ( $\text{C}^{10'}$ ), 172.8 ( $\text{C}^3$ ), 172.6 ( $\text{C}^{3'}$ ), 169.2 ( $\text{C}^{16}$ ), 169.0 ( $\text{C}^{16'}$ ), 140.0 ( $\text{C}^{17}$ ), 120.0 ( $\text{C}^{18}$ ), 82.2, 82.1, 82.0, 81.9 ( $\text{C}(\text{CH}_3)_3$ ), 61.5 ( $\text{C}^9$ ), 61.4 ( $\text{C}^{9'}$ ), 55.8 ( $\text{C}^4$ ), 52.7, 48.5, 48.4, 47.6, 47.5, 44.9, 44.6 ( $\text{CH}_2$  cyclen), 39.6, 39.5, 39.3, 39.1 ( $\text{CH}_2\text{NH}$ ), 29.9, 29.6, 29.4 ( $\text{CH}_2\text{CH}_2\text{NH}$ ), 28.4, 28.2, 28.1, 27.9 ( $\text{CH}_3$ ), 22.3 ( $\text{C}^{13}$ ), 22.1 ( $\text{C}^{13'}$ ), 19.2 ( $\text{C}^{19}$ ), 19.1 ( $\text{C}^{19'}$ ). **HRMS (ESI $^+$ , m/z):** calculated for  $\text{C}_{46}\text{H}_{82}\text{N}_6\text{NaO}_{10}$ ,  $[\text{M}+\text{Na}]^+$ : 901.5985, found 901.5981.

**2.3.13 Gadolinium(III) (2,2'-(7,10-bis(carboxylatomethyl)-1,4,7,10-tetraazacyclododecane-1,4-diyl)bis(5-methacrylamidopentanoate)) (26)**

**Part A** - 2,2'-(7,10-Bis(carboxymethyl)-1,4,7,10-tetraazacyclododecane-1,4-diyl)bis-(5-methacrylamidopentanoic acid) (**25**)

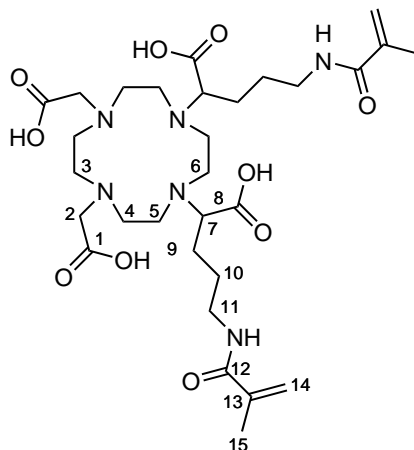

Compound **24** (350 mg, 0.40 mmol, 1.00 equiv.) was stirred in TFA (10.0 mL) and H<sub>2</sub>O (1.00 mL) and stirred for 72 hours at room temperature for full deprotection (LC-MS analysis). The reaction mixture was concentrated under reduced pressure and residual TFA was removed by coevaporation with CH<sub>2</sub>Cl<sub>2</sub> (5 × 20 mL). The resulting residue was dissolved in deionised water, centrifuged twice and the supernatant was filtered through a syringe filter (220 nm cut-off). The filtrate was lyophilised to afford **25** (280 mg) as a slightly yellow powder. The crude material was used directly in the next step without further purification. **HRMS (ESI<sup>+</sup>, m/z)**: calculated for C<sub>30</sub>H<sub>51</sub>N<sub>6</sub>O<sub>10</sub>, [M+H]<sup>+</sup>:655.3661, found 655.3659.

**Part B** - Gadolinium(III) (2,2'-(7,10-bis(carboxylatomethyl)-1,4,7,10-tetraazacyclododecane-1,4-diyl)bis(5-methacrylamidopentanoate)) (**26**)

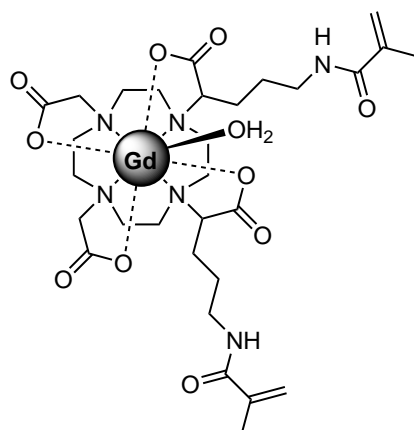

Deprotected ligand **25** (261 mg, 0.40 mmol, 1.00 equiv.) and gadolinium(III) chloride hexahydrate (156 mg, 0.42 mmol, 1.05 equiv.) were stirred in deionized water (10.0 mL) for 24 hours

at room temperature. Over the course of the reaction, the pH was adjusted to 7 by addition of aq. HCl or aq. NaOH. The reaction mixture was lyophilised and the resulting solid was redissolved in deionised water, and centrifuged twice, the supernatant was filtered through a syringe filter (220 nm cut-off) and purified by preparative HPLC [gradient system B: H<sub>2</sub>O (25 mM NH<sub>4</sub>HCO<sub>3</sub>/CH<sub>3</sub>CN (see section 2.5)]. The fractions containing the product were combined to yield, after lyophilisation, complex **26** (66.0 mg, 84.2  $\mu$ mol, 21% over 3 steps) as a white amorphous powder. **IR** ( $\nu_{\text{max}}$ /cm<sup>-1</sup>, neat): 3273, 3066, 2924, 2868, 1589, 1387, 1316, 1083. **HRMS** (ESI<sup>-</sup>, m/z): calculated for C<sub>30</sub>H<sub>46</sub><sup>158</sup>GdN<sub>6</sub>O<sub>10</sub>, [M]<sup>-</sup>:808.2511, found 808.2535. **HPLC** [gradient system B, H<sub>2</sub>O (25 mM NH<sub>4</sub>HCO<sub>3</sub>/CH<sub>3</sub>CN)]:  $t_R$  = 5.49 minutes. **Relaxivity** (H<sub>2</sub>O, 60 MHz, pH = 7.4, 37 °C):  $r_1$  = 5.7 mM<sup>-1</sup>s<sup>-1</sup>.

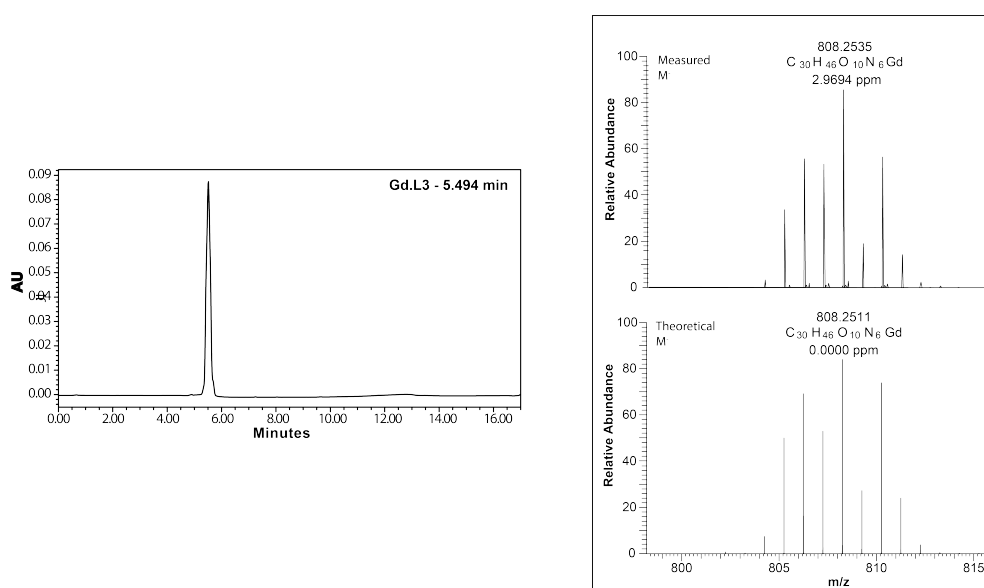

**Figure S3.** HPLC trace and HRMS spectra of **Gd.L3**.

## 2.4 Synthesis of Gd.L<sub>4</sub>

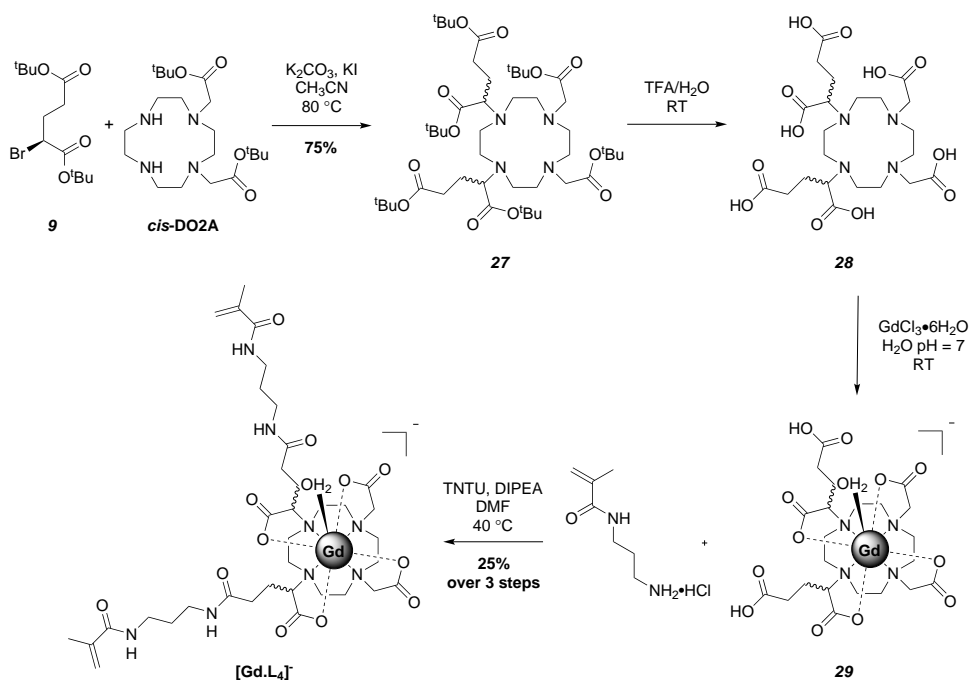

Scheme S4. Synthesis of Gd.L<sub>4</sub>.

### 2.4.1 Tetra-*tert*-butyl 2,2'-(7,10-bis(2-(*tert*-butoxy)-2-oxoethyl)-1,4,7,10-tetraazacyclododecane-1,4-diyl)diglutarate (**27**)

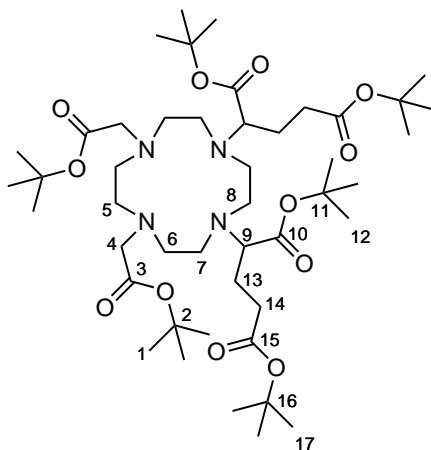

Compound **27** was synthesised following the modification of a literature procedure.<sup>19</sup> *Cis*-DO2A (500 mg, 1.25 mmol, 1.00 equiv.), K<sub>2</sub>CO<sub>3</sub> (1.04 g, 7.49 mmol, 6.00 equiv.), arm **9** (1.13 g, 3.50 mmol, 2.80 equiv.), and potassium iodide (414 mg, 2.50 mmol, 2.00 equiv.) were dissolved in anhydrous CH<sub>3</sub>CN (10 mL) and the reaction was stirred at 80 °C overnight. Potassium salts were removed by centrifugation, and the supernatant was concentrated under reduced

pressure to obtain an oil. The crude residue was purified by column chromatography (silica gel, neat CH<sub>2</sub>Cl<sub>2</sub> to CH<sub>2</sub>Cl<sub>2</sub>/CH<sub>3</sub>OH 90:10 v/v, with an increment of 2%) to yield compound **27** (823 mg, 0.93 mmol, 75%) as a yellow amorphous solid. **IR** ( $\nu_{max}/\text{cm}^{-1}$ , neat): 3322, 2974, 2932, 2832, 1718, 1366, 1227, 1147. **<sup>1</sup>H NMR** (400 MHz, CDCl<sub>3</sub>)  $\delta$  (ppm): 3.41 (2H, app. d,  $J$  = 10.0 Hz, H<sup>9</sup>), 3.34 (2H, d,  $^2J$  = 17.3 Hz, H<sup>4a</sup>), 3.25-2.85 (4H, 2  $\times$  CH<sub>2</sub> cyclen), 2.79 (2H, d,  $^2J$  = 17.3 Hz, H<sup>4b</sup>), 2.60-2.00 (12H, 6  $\times$  CH<sub>2</sub> cyclen), 2.00-1.80 (4H, m, H<sup>14</sup>), 1.65-1.50 (4H, m, H<sup>13</sup>), 1.50-1.35 (54H, 18  $\times$  CH<sub>3</sub>). **<sup>13</sup>C NMR** (101 MHz, CDCl<sub>3</sub>)  $\delta$  (ppm): 174.9, 172.9, 172.8, 172.4, 172.3, 172.0 (CO<sub>2</sub>*t*Bu), 82.4, 82.3, 81.9, 81.8, 80.6, 80.5 (C(CH<sub>3</sub>)<sub>3</sub>), 60.2 (C<sup>9</sup>), 60.1 (C<sup>9'</sup>), 55.8, 55.7, 55.0 (CH<sub>2</sub>CO<sub>2</sub>*t*Bu), 52.6, 48.6(2), 48.5(7), 47.4, 47.3, 44.7, 44.5 (CH<sub>2</sub> cyclen), 33.7 (C<sup>13</sup>), 31.8 (C<sup>14</sup>), 28.3, 28.2, 28.1, 28.0, 27.9(3), 27.8(6) (CH<sub>3</sub>). **HRMS** (ESI<sup>+</sup>, *m/z*): calculated for C<sub>46</sub>H<sub>85</sub>N<sub>4</sub>O<sub>12</sub>, [M+H]<sup>+</sup>:885.6159, found 885.6158.

Spectral data were in accordance with that reported in the literature.<sup>19</sup>

#### 2.4.2 Gadolinium(III) (2,2'-(7,10-bis(carboxylatomethyl)-1,4,7,10-tetraazacyclododecane-1,4-diyl)bis(5-((3-methacrylamidopropyl)amino)-5-oxopentanoate)) (29)

**Part A** - 2,2'-(7,10-Bis(carboxymethyl)-1,4,7,10-tetraazacyclododecane-1,4-diyl)-diglutaric acid (**28**)

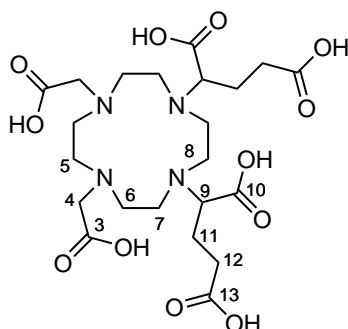

Compound **27** was synthesised following the modification of a literature procedure.<sup>19</sup> Ligand **27** (750 mg, 0.85 mmol, 1.00 equiv.) was stirred in TFA (10.0 mL) and H<sub>2</sub>O (1.00 mL) at room temperature for 3 days until complete deprotection (LC-MS analysis). The mixture was concentrated under reduced pressure and residual TFA was removed by successive co-evaporation with CH<sub>2</sub>Cl<sub>2</sub>. The resulting residue was dissolved in deionised water, centrifuged and filtered through a syringe filter (cut-off 220 nm), and lyophilised to afford a white solid. The crude product was used directly in the next step without further purification. **IR** ( $\nu_{max}/\text{cm}^{-1}$ , neat): 3084, 2933, 2556, 1945, 1708, 1662, 1390, 1177, 1130. **HRMS** (ESI<sup>+</sup>, *m/z*): calculated for C<sub>22</sub>H<sub>37</sub>N<sub>4</sub>O<sub>12</sub>, [M+H]<sup>+</sup>:549.2402, found 549.2402.

**Part B** - Gadolinium(III) (2,2'-(7,10-bis(carboxylatomethyl)-1,4,7,10-tetra-azacyclododecane-1,4-diyl)bis(4-carboxybutanoate)) (**29**)

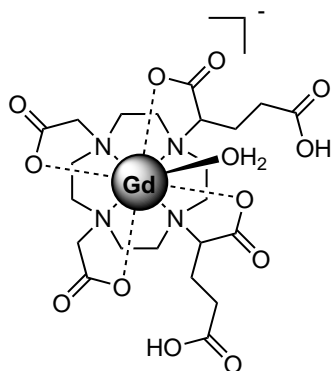

Compound **28** was synthesised following the modification of a literature procedure.<sup>19</sup> Deprotected ligand **28** (400 mg, 0.73 mmol, 1.00 equiv.) and gadolinium(III) chloride hexahydrate (454 mg, 0.88 mmol, 1.20 equiv.) were stirred in water (10.0 mL) at room temperature for 24 hours. Over the course of the reaction, the pH was adjusted to 7 by addition of aq. HCl or aq. NaOH. The reaction mixture was lyophilised and the resulting solid was dissolved in deionised water, centrifuged twice and filtered through a syringe filter (220 nm cut-off). The supernatant was then lyophilised to afford the Gd complex **29** as a white amorphous solid. The crude product was directly engaged in the next reaction step without further purification. **IR** ( $\nu_{max}/\text{cm}^{-1}$ , neat): 3400, 2980, 2838, 1684, 1600, 1396, 1205, 1128. **HRMS** (ESI<sup>-</sup>, m/z): calculated for  $\text{C}_{22}\text{H}_{32}^{158}\text{GdN}_4\text{O}_{12}$ , [M]<sup>-</sup>: 702.1258, found 702.1246.

**Part C** - Gadolinium(III) (2,2'-(7,10-bis(carboxylatomethyl)-1,4,7,10-tetraazacyclododecane-1,4-diyl)bis(5-((3-methacrylamidopropyl)amino)-5-oxopentanoate)) (**30**)

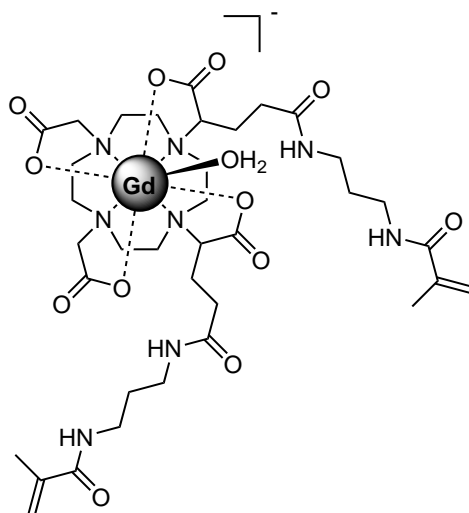

Compound **30** was synthesised following the modification of a literature procedure.<sup>19</sup> Gd complex **29** (200 mg, 0.29 mmol, 1.00 equiv.) and 2-(5-norborene-2,3-dicarboximido)-1,1,3,3-tetramethyluronium tetrafluoroborate (219 mg, 0.60 mmol, 2.10 equiv.) were dissolved in DMF (5.00 mL) at room temperature. The solution was stirred for 30 minutes at 40 °C and DIPEA

(199  $\mu\text{L}$ , 1.14 mmol, 4.00 equiv.) was added, followed by *N*-(3-aminopropyl)methacrylamide hydrochloride (107 mg, 0.60 mmol, 2.10 equiv.). The reaction was stirred for 1 hour at 40 °C and then at room temperature overnight. The desired Gd-complex was precipitated in cold diethylether and collected by filtration. The solid was washed with cold Et<sub>2</sub>O and dried under vacuum. The crude residue was dissolved in water and purified by reverse phase preparative HPLC [gradient system B, H<sub>2</sub>O (25 mM NH<sub>4</sub>HCO<sub>3</sub>)/CH<sub>3</sub>CN, see section 2.5) to afford, after lyophilisation, complex **30** (68.2 mg, 71.8  $\mu\text{mol}$ , 25% over 3 steps) as a white amorphous solid. **IR** ( $\nu_{\text{max}}/\text{cm}^{-1}$ , neat): 3280, 3076, 2928, 2870, 1596, 1538, 1436, 1381, 1085. **HRMS** (ESI<sup>-</sup>, **m/z**): calculated for C<sub>36</sub>H<sub>56</sub><sup>158</sup>GdN<sub>8</sub>O<sub>12</sub>, [M]<sup>-</sup>:950.3259, found 950.3257. **HPLC** [gradient system B, H<sub>2</sub>O (25 mM NH<sub>4</sub>HCO<sub>3</sub>)/CH<sub>3</sub>CN]:  $t_{\text{R}}$  = 5.533 minutes. **Relaxivity** (H<sub>2</sub>O, 60 MHz, pH = 7.4, 37 °C):  $r_1$  = 6.8 mM<sup>-1</sup>s<sup>-1</sup>.

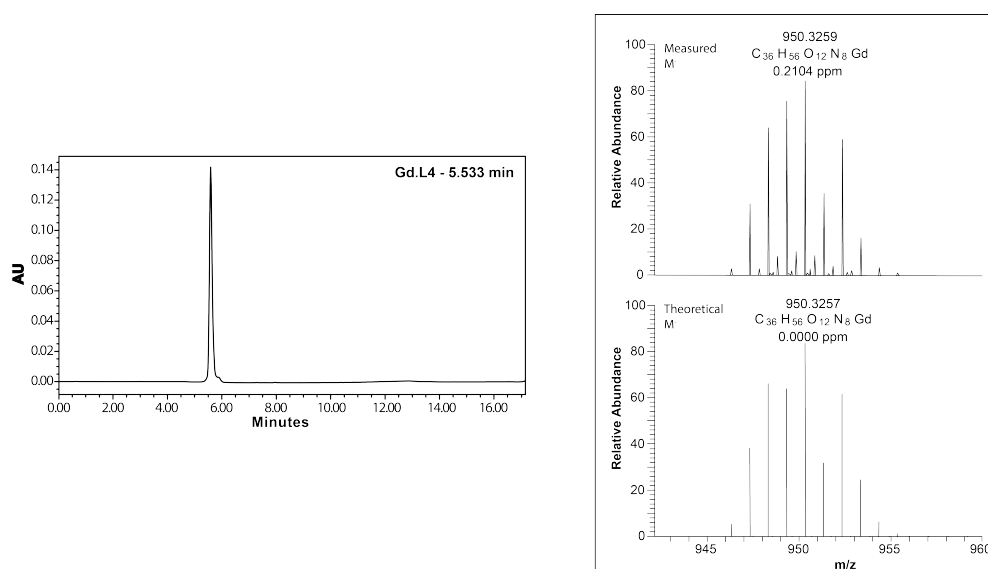

**Figure S4.** HPLC trace and HRMS spectra of **Gd.L4**.

## 2.5 High Performace Liquid Chromatography

**Table S1.** Description of HPLC gradients.

| Time (min) | Gradient A    |               | Gradient B    |               |
|------------|---------------|---------------|---------------|---------------|
|            | Solvent A (%) | Solvent B (%) | Solvent A (%) | Solvent B (%) |
| 0          | 100           | 0             | 100           | 0             |
| 2          | 100           | 0             | 100           | 0             |
| 12         | 50            | 50            | 0             | 100           |
| 13         | 0             | 100           | 0             | 100           |
| 15         | 0             | 100           | 0             | 100           |
| 17         | 100           | 0             | 100           | 0             |

### 3 Characterisation of Linear and Hyperbranched polymeric CAs

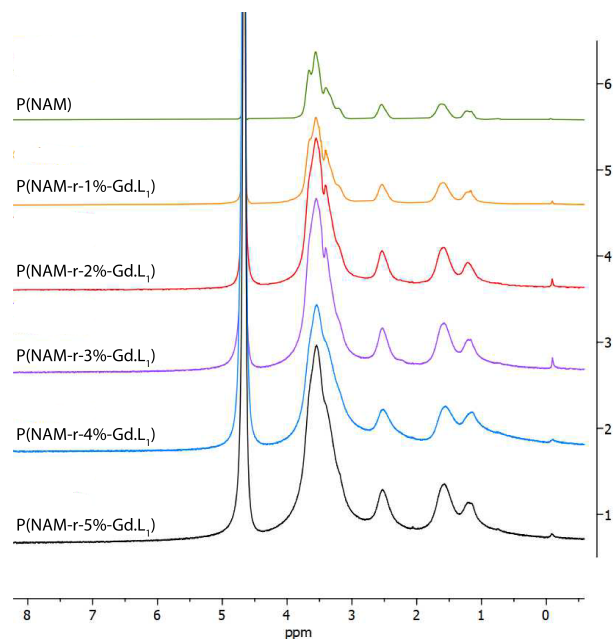

**Figure S5.** NMR spectra of purified **P(NAM)** and **P(NAM-r-Gd.L<sub>1</sub>)**. polymers showing increased broadening with increasing Gd amount in the polymer formulation. The signal intensity between spectra was normalised to the D<sub>2</sub>O solvent peak intensity.



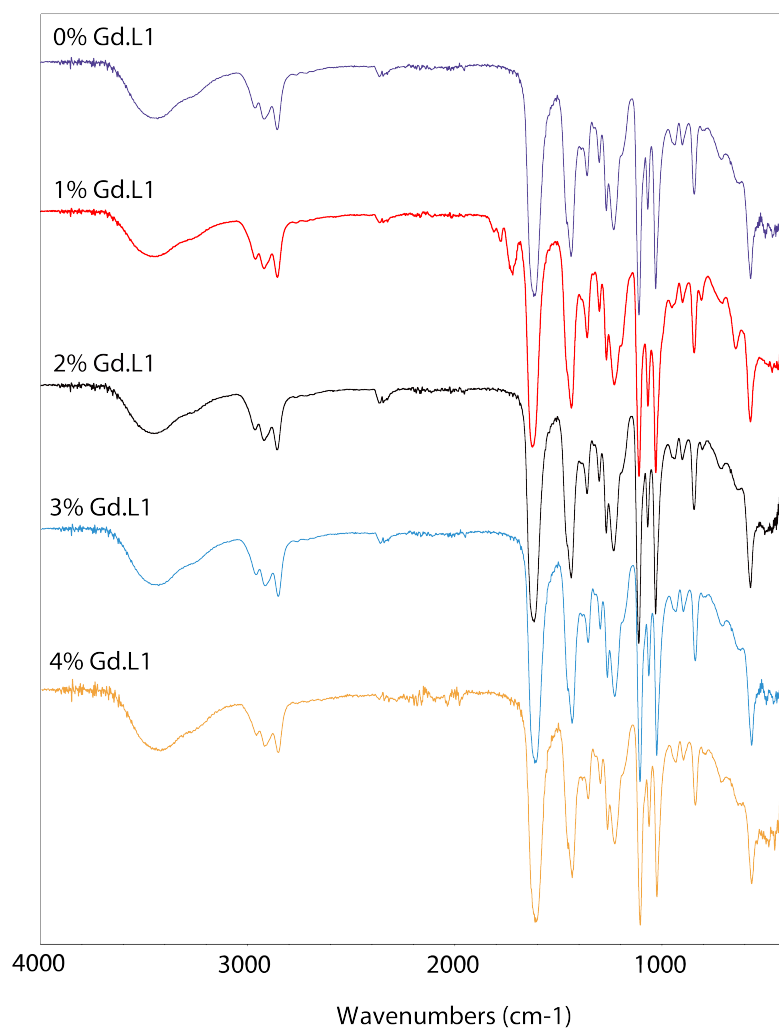

**Figure S6.** IR spectra of synthesised P(NAM-r-Gd.L<sub>1</sub>) linear copolymers.

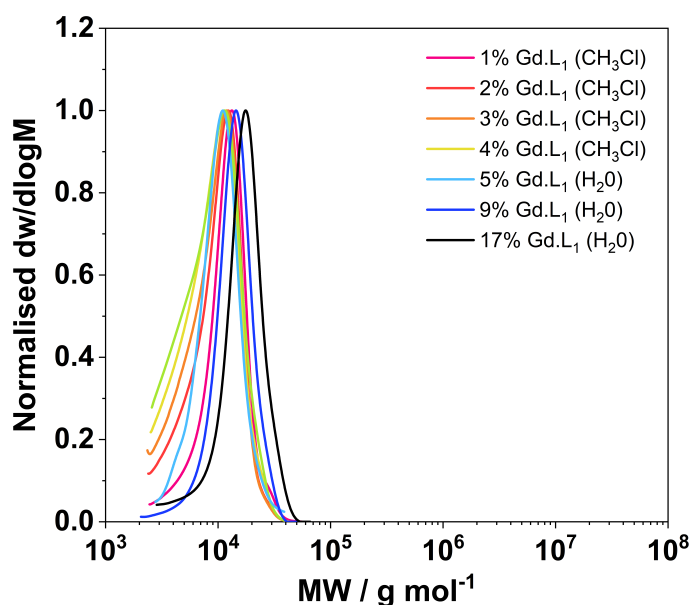

**Figure S7.** Molecular weight distribution curves of linear copolymers of Gd.L<sub>1</sub> obtained by size exclusion chromatography in either chloroform or water.

**Table S2.** ICP-MS data of linear P(NAM-r-Gd.L<sub>1</sub>), polymers and determination of the Number of Gd atoms per macromolecule.

| ICP-MS analysis of linear P(NAM-r-Gd.L1) copolymers |                                     |                          |                                 |                                                           |                                        |                    |                       |                                   |
|-----------------------------------------------------|-------------------------------------|--------------------------|---------------------------------|-----------------------------------------------------------|----------------------------------------|--------------------|-----------------------|-----------------------------------|
| Entry                                               | $N_{Theoretical}^{Gd}$ <sup>h</sup> | [Gd] <sup>a</sup><br>ppb | Dilution<br>Factor <sup>b</sup> | [Gd] <sub>Sample</sub> <sup>c</sup><br>μg L <sup>-1</sup> | M <sub>Sample</sub> <sup>d</sup><br>mg | $M_n$ <sup>e</sup> | $N^{Gd}$ <sup>f</sup> | $N_{Corrected}^{Gd}$ <sup>g</sup> |
| 1                                                   | <b>Gd.L<sub>1</sub> (1)</b>         | 35.53 ± 0.44             | 4,000                           | 142,120                                                   | 0.98                                   | 682.81             | 0.643                 | <b>1</b>                          |
| 2                                                   | <b>0.94</b>                         | 18.27 ± 0.21             | 400                             | 7,308                                                     | 1.41                                   | 10,260             | 0.240                 | <b>0.374</b>                      |
| 3                                                   | <b>1.89</b>                         | 36.70 ± 0.03             | 400                             | 14,680                                                    | 1.15                                   | 10,850             | 0.766                 | <b>1.195</b>                      |
| 4                                                   | <b>2.84</b>                         | 41.70 ± 0.68             | 400                             | 16,680                                                    | 1.11                                   | 10,210             | 0.879                 | <b>1.371</b>                      |
| 5                                                   | <b>3.78</b>                         | 45.65 ± 0.15             | 400                             | 18,260                                                    | 0.93                                   | 7,580              | 1.018                 | <b>1.588</b>                      |
| 6                                                   | <b>4.48</b>                         | 48.90 ± 0.34             | 400                             | 19,560                                                    | 1.83                                   | 9,150              | 0.339                 | <b>0.529</b>                      |
| 7                                                   | <b>8.58</b>                         | 14.46 ± 0.14             | 4,000                           | 57,840                                                    | 1.53                                   | 12,150             | 1.908                 | <b>2.977</b>                      |
| 8                                                   | <b>16.67</b>                        | 15.71 ± 0.03             | 4,000                           | 62,840                                                    | 1.05                                   | 14,176             | 5.138                 | <b>8.016</b>                      |

<sup>a</sup> Measured by ICP-MS based on MS signal <sup>157</sup>Gd isotope. <sup>b</sup> Required dilution factor to obtain analysable dilute solution from initial sample solution. <sup>c</sup> Gd weight concentration of the initial sample solution:  $[Gd]_{Sample} = [Gd] \times \text{Dilution factor}$ . <sup>d</sup> Mass of sample used to prepared the initial solution. <sup>e</sup> Determined by GPC or HRMS. <sup>f</sup>  $N^{Gd} = ([Gd]_M / M_w^{Gd}) / ([Polymer]_M / M_n \text{ Polymer})$ , where  $[Gd]_M$  is the mass fraction of Gd in the non-diluted sample,  $M_w^{Gd}$  is the atomic weight of Gd,  $[Polymer]_M$  is the mass concentration of polymer in the sample and  $M_n$  is the polymer MW. <sup>g</sup>  $N_{Corrected}^{Gd} = N^{Gd} \times (N_{Corrected}^{Gd}(\text{Gd.L}_1) / N^{Gd}(\text{Gd.L}_1))$ . <sup>h</sup> recalculated from used molar amounts of NAM and **Gd.L<sub>1</sub>**.

**Table S3.** ICP-MS data of some hyperbranched polymers and estimation of the number of Gd atoms per macromolecule.

| ICP-MS analysis of hyperbranched P(NAM-r-Gd.L <sub>2</sub> ) copolymers |                                     |                          |                                 |                                                           |                                        |                             |                              |                                                   |
|-------------------------------------------------------------------------|-------------------------------------|--------------------------|---------------------------------|-----------------------------------------------------------|----------------------------------------|-----------------------------|------------------------------|---------------------------------------------------|
| Entry                                                                   | $N_{Theoretical}^{Gd}$ <sup>h</sup> | [Gd] <sup>a</sup><br>ppb | Dilution<br>Factor <sup>b</sup> | [Gd] <sub>Sample</sub> <sup>c</sup><br>μg L <sup>-1</sup> | M <sub>Sample</sub> <sup>d</sup><br>mg | M <sub>n</sub> <sup>e</sup> | N <sup>Gd</sup> <sup>f</sup> | N <sup>Gd</sup> <sub>Corrected</sub> <sup>g</sup> |
| Gd.L <sub>2</sub>                                                       | 1.00                                | 34.99 ± 0.42             | 4,000                           | 139,960                                                   | 1.28                                   | 807.98                      | 0.44                         | <b>1.00</b>                                       |
| P(NAM-r-0.9%-Gd.L <sub>2</sub> )<br>[M] <sub>0</sub> =1.00 M            | <b>7.69</b>                         | 17.82 ± 0.07             | 400                             | 7,128                                                     | 1.43                                   | 138,600                     | 3.07                         | <b>7.00</b>                                       |
| P(NAM-r-0.9%-Gd.L <sub>2</sub> )<br>[M] <sub>0</sub> =1.25 M            | <b>22.75</b>                        | 12.3 ± 0.11              | 400                             | 4,920                                                     | 1.11                                   | 378,600                     | 9.61                         | <b>21.90</b>                                      |
| P(NAM-r-0.9%-Gd.L <sub>2</sub> )<br>[M] <sub>0</sub> =1.50 M            | <b>36.17</b>                        | 15.69 ± 0.11             | 400                             | 6,276                                                     | 1.33                                   | 592,700                     | 13.37                        | <b>30.46</b>                                      |
| P(NAM-r-0.9%-Gd.L <sub>2</sub> )<br>[M] <sub>0</sub> =2.00 M            | <b>45.71</b>                        | 15.02 ± 0.19             | 400                             | 6,008                                                     | 1.39                                   | 744,700                     | 14.73                        | <b>33.55</b>                                      |

<sup>a</sup> Measured by ICP-MS based on <sup>157</sup>Gd isotope MS signal. <sup>b</sup> Dilution factor required to obtain analysable dilute solution from mother HNO<sub>3</sub> sample solution. <sup>c</sup> Gd weight concentration of the mother sample solution: [Gd]<sub>Sample</sub>=[Gd]\*Dilution factor. <sup>d</sup> Mass of sample used to prepared the nitric mother solution. <sup>e</sup> Determine by GPC or HRMS. <sup>f</sup>  $N_{Gd} = ([Gd]_w/M_w^{Gd})/([Polymer]_w/M_w^{Polymer})$ , where [Gd]<sub>w</sub> is the mass fraction of Gd in the non-diluted sample, M<sub>w</sub><sup>Gd</sup> is Gd atomic mass, [Polymer]<sub>w</sub> is the mass concentration of polymer in the sample and M<sub>w</sub> is hyperbranched system MW average number of the polymer. <sup>g</sup>  $N_{Gd}^{Corrected} = N_{Gd} \times (N_{Gd}^{Corrected}(Gd.L_1)/N_{Gd}(Gd.L_1))$ . <sup>h</sup>  $N_{Gd}^{Theoretical} = ((M_w^{HBP}/M_w^{LP}) - 1) \times [(mol \% \# / 0.9) \text{ for } (mol \% Gd.L_X\%) < 0.9], M_w^{HBP}$  being the GPC M<sub>w</sub> of the hyperbranched polymer and M<sub>w</sub><sup>LP</sup> is the expected MW of a linear polymer analogue.

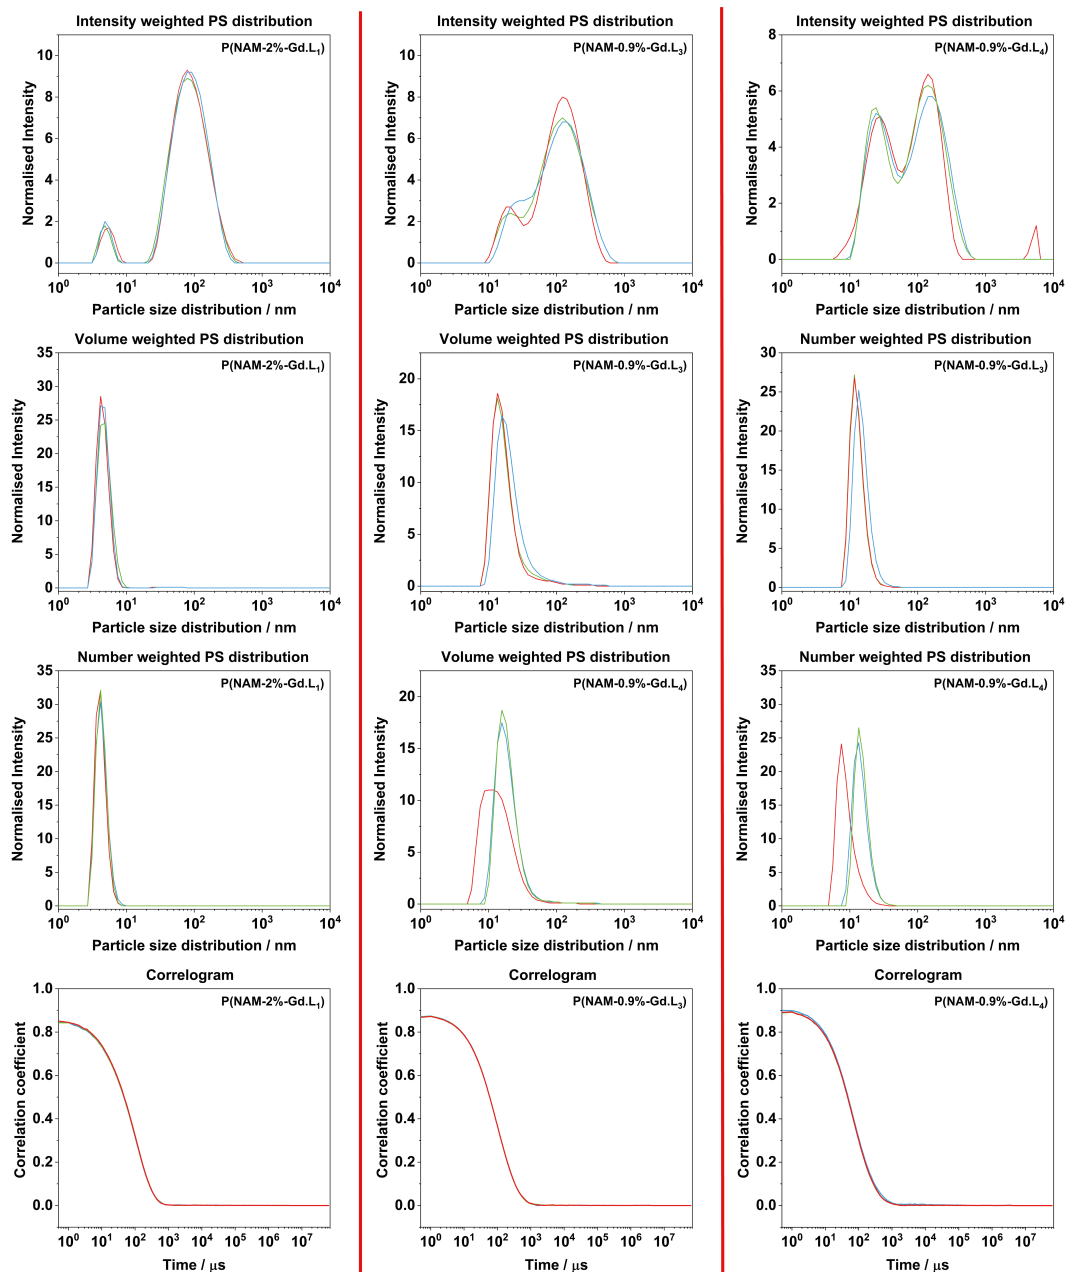

**Figure S8.** Representative examples of DLS particle size distributions (intensity/volume and number weighted) with associated correlograms for linear and hyperbranched polymeric CAs, obtained in deionized water at 25 °C after filtration with a syringe filter (220 nm cut-off). Each polymer sample was analysed three times and each measurement is associated with a distinctive colour, either blue, red or green.

**Table S4.** Hydrodynamic diameter and polydispersities values for representative examples of our polymeric CAs determined by DLS measurements.

|                              |    | DLS results - Determination of hydrodynamic diameter $D_h$ by : |           |         |         |
|------------------------------|----|-----------------------------------------------------------------|-----------|---------|---------|
|                              |    | PDI                                                             | Intensity | Volume  | Number  |
| P(NAM-2%-Gd.L <sub>1</sub> ) | A  | 0.34                                                            | 61.8 nm   | 4.6 nm  | 4.2 nm  |
|                              | B  | 0.35                                                            | 61.7 nm   | 4.9 nm  | 4.4 nm  |
|                              | C  | 0.35                                                            | 62.3 nm   | 4.7 nm  | 4.4 nm  |
| P(NAM-Gd.L <sub>3</sub> )    | A  | 0.51                                                            | 67.0 nm   | 21.5 nm | 13.1 nm |
|                              | B  | 0.51                                                            | 67.2 nm   | 20.3 nm | 13.2 nm |
|                              | C* | 0.51                                                            | 67.0 nm   | 26.2 nm | 15.3 nm |
| P(NAM-Gd.L <sub>4</sub> )    | A* | 0.50                                                            | 52.1 nm   | 15.9 nm | 9.1 nm  |
|                              | B  | 0.48                                                            | 51.5 nm   | 21.6 nm | 14.7 nm |
|                              | C  | 0.48                                                            | 51.8 nm   | 21.6 nm | 15.4 nm |

\*theses measurments were disgarded for the determination of the average  $D_h$ .

## 4 Relaxometry Study Data

### 4.1 Acquisition of NMRD Profiles

To obtain NMRD profiles with the relaxivity on the y axis, it is necessary to calculate the relaxivity  $r_1$  from the observed measured relaxation rates according to Equation 1. With [Gd], the concentration of Gd determined by measurement of the bulk magnetic susceptibility shifts of  $t$ BuOH signals in the samples (Evans method),<sup>24</sup>  $R_{1,d}$  the diamagnetic contribution of the solvent, determined empirically at  $0.28 \text{ s}^{-1}$  for a set temperature of  $37^\circ\text{C}$ .

$$r_1 = \frac{R_{1,obs} - R_{1,d}}{[Gd]} \quad (1)$$

$$[Gd] = \frac{\Delta\delta_{ppm} 3T}{4\pi \times 10^3} \left( \frac{2.84}{\mu_{eff}(Gd)} \right)^2 \quad (2)$$

[Gd] of the different dilutions was determined by NMR BMS measurements following equation 2, In practice, the Gd concentrations (expressed in mM) were determined by measuring the BMS peak shift of a reference molecule added to an aqueous solution of a paramagnetic compound, 1% *tert*-butanol in this case. As water gives large solvent peaks, the use of a reference proton signal leads to more precise measurements. The BMS shift  $\Delta\delta_{ppm}$  was measured by  $^1\text{H}$  NMR with a coaxial insert containing a reference diamagnetic solution of *tert*-butanol in  $\text{H}_2\text{O}$  (1% *v/v*) where T is the temperature of the sample in the NMR spectrometer in Kelvin and  $\mu_{eff}$  (Gd) is the effective magnetic moment of a gadolinium atom.

### 4.2 Acquisition of Variable Temperature relaxometry profiles

VT  $^1\text{H}$  NMR Measurements. Variable temperature  $^1\text{H}$  NMR profile represents the variation of the water proton relaxation rate of a paramagnetic compound in non-deuterated aqueous solutions, depending on the temperature at a fixed magnetic field intensity (20 or 30 MHz) using an inversion recovery method with a  $90^\circ$  pulse. The profiles were obtained by measuring the relaxation rate at different temperature from  $5$  to  $75^\circ\text{C}$  (12 to 16 acquisition points). The relaxometer operates under computer control with an absolute uncertainty in  $1/T_1$  values obtained with an error not exceeding  $\pm 1\%$ . The temperature was set and controlled with a Stelar VTC-91 airflow heater equipped with a copper-constantan thermocouple (error  $\pm 0.1^\circ\text{C}$ ) and an air/liquid nitrogen cooling system for temperatures lower than room temperature. Data points were obtained by measurements at high magnetic fields (20 or 30 MHz) on a Stelar relaxometer with a Spinmaster console connected to a Bruker WP-80 magnet at 80 MHz (2 T) adapted to variable-field measurements. The temperature dependence of  $\tau_V$  and  $\tau_R$  has been consid-

ered through their activation energies  $E_V$ , set to 1.0 kJ mol<sup>-1</sup>, and  $E_R$ , fixed to 18.0 kJ mol<sup>-1</sup>.  
ICP-MS Measurements. The exact concentration

### 4.3 NMRD Profiles Discrete Complexes

**Table S5.** NMRD raw data Gd.L<sub>1</sub>.

| <b>NMRD Data - Gd.L<sub>1</sub> - [Gd<sup>3+</sup>] = 21.81 mM</b> |                                  |                                       |                       |                                  |                                       |
|--------------------------------------------------------------------|----------------------------------|---------------------------------------|-----------------------|----------------------------------|---------------------------------------|
| <b>25 °C</b>                                                       |                                  |                                       | <b>37 °C</b>          |                                  |                                       |
| <b>Magnetic Field</b>                                              | <b>R<sub>1</sub><sup>a</sup></b> | <b>r<sub>1</sub><sup>b</sup></b>      | <b>Magnetic Field</b> | <b>R<sub>1</sub><sup>a</sup></b> | <b>r<sub>1</sub><sup>b</sup></b>      |
| <b>MHz</b>                                                         | <b>s<sup>-1</sup></b>            | <b>mM<sup>-1</sup> s<sup>-1</sup></b> | <b>MHz</b>            | <b>s<sup>-1</sup></b>            | <b>mM<sup>-1</sup> s<sup>-1</sup></b> |
| 0.00997                                                            | 292.58                           | 13.40367                              | 0.00997               | 240.59                           | 11.01881                              |
| 0.01436                                                            | 281.35                           | 13.42853                              | 0.01436               | 240.02                           | 10.99266                              |
| 0.0207                                                             | 299.32                           | 13.35322                              | 0.0207                | 237.7                            | 10.88624                              |
| 0.02973                                                            | 291.07                           | 13.3344                               | 0.02973               | 238.9                            | 10.94128                              |
| 0.04287                                                            | 296.69                           | 13.3922                               | 0.04287               | 238.05                           | 10.90229                              |
| 0.06162                                                            | 292.52                           | 13.40092                              | 0.06162               | 237.58                           | 10.88073                              |
| 0.08854                                                            | 286.05                           | 13.30413                              | 0.08854               | 240.02                           | 10.99266                              |
| 0.12749                                                            | 290.03                           | 13.2867                               | 0.12749               | 237.1                            | 10.85872                              |
| 0.18317                                                            | 290.3                            | 13.29908                              | 0.18317               | 233.09                           | 10.67477                              |
| 0.26376                                                            | 295.82                           | 13.25229                              | 0.26376               | 237.13                           | 10.86009                              |
| 0.37932                                                            | 303.17                           | 13.38945                              | 0.37932               | 229.74                           | 10.8211                               |
| 0.54549                                                            | 301.3                            | 13.30367                              | 0.54549               | 227.74                           | 10.72936                              |
| 0.7845                                                             | 276.41                           | 12.96193                              | 0.7845                | 236.39                           | 10.82615                              |
| 1.1292                                                             | 263.9                            | 12.48807                              | 1.1292                | 228.64                           | 10.47064                              |
| 1.6235                                                             | 271.44                           | 11.93394                              | 1.6235                | 214.77                           | 9.8344                                |
| 2.3363                                                             | 240.18                           | 11.02                                 | 2.3363                | 204.58                           | 9.36697                               |
| 3.3598                                                             | 202.91                           | 10.29037                              | 3.3598                | 185.91                           | 8.51055                               |
| 3.3598                                                             | 229.96                           | 10.23119                              | 3.3598                | 184.84                           | 8.46147                               |
| 4.8321                                                             | 193.83                           | 8.87385                               | 4.8321                | 157.83                           | 7.22248                               |
| 6.9526                                                             | 165.96                           | 7.59541                               | 6.9526                | 141.13                           | 6.45642                               |
| 9.9994                                                             | 156.41                           | 7.15734                               | 9.9994                | 131.28                           | 6.00459                               |
| 21                                                                 | 141.62                           | 6.4789                                | 21                    | 111.86                           | 5.11376                               |
| 31                                                                 | 135.98                           | 6.22018                               | 31                    | 108.61                           | 4.96468                               |
| 41                                                                 | 132.96                           | 6.08165                               | 41                    | 105.56                           | 4.82477                               |
| 49                                                                 | 127.75                           | 5.84266                               | 49                    | 102.65                           | 4.69128                               |
| 61                                                                 | 123.4                            | 5.64312                               | 61                    | 98.75                            | 4.51239                               |
| 72                                                                 | 114.61                           | 5.63991                               | 72                    | 95.12                            | 4.34587                               |

<sup>a</sup> Measured longitudinal relaxation rate. <sup>b</sup>  $r_1$  calculated from the following equation:  $r_1 = (R_1 - {}^{H_2O}r_1) / [Gd^{3+}]$ ,  ${}^{H_2O}r_1$  being the diamagnetic longitudinal relaxation rate of water (0.38 s<sup>-1</sup> at 25°C, 0.28 s<sup>-1</sup> at 37°C).

**Table S6.** NMRD raw data Gd.L<sub>2</sub>.

| <b>NMRD Data - Gd.L<sub>2</sub> - [Gd<sup>3+</sup>] = 5.41 mM</b> |                                  |                                       |                       |                                  |                                       |
|-------------------------------------------------------------------|----------------------------------|---------------------------------------|-----------------------|----------------------------------|---------------------------------------|
| <b>25 °C</b>                                                      |                                  |                                       | <b>37 °C</b>          |                                  |                                       |
| <b>Magnetic Field</b>                                             | <b>R<sub>1</sub><sup>a</sup></b> | <b>r<sub>1</sub><sup>b</sup></b>      | <b>Magnetic Field</b> | <b>R<sub>1</sub><sup>a</sup></b> | <b>r<sub>1</sub><sup>b</sup></b>      |
| <b>MHz</b>                                                        | <b>s<sup>-1</sup></b>            | <b>mM<sup>-1</sup> s<sup>-1</sup></b> | <b>MHz</b>            | <b>s<sup>-1</sup></b>            | <b>mM<sup>-1</sup> s<sup>-1</sup></b> |
| 0.00997                                                           | 78.581                           | 14.48167                              | 0.00997               | 68.123                           | 12.545                                |
| 0.01436                                                           | 79.607                           | 14.67167                              | 0.01436               | 67.235                           | 12.38056                              |
| 0.0207                                                            | 79.068                           | 14.57185                              | 0.0207                | 68.013                           | 12.52463                              |
| 0.02973                                                           | 79.465                           | 14.64537                              | 0.02973               | 68.22                            | 12.56296                              |
| 0.04287                                                           | 80.281                           | 14.79648                              | 0.04287               | 66.669                           | 12.27574                              |
| 0.06162                                                           | 80.037                           | 14.7513                               | 0.06162               | 67.434                           | 12.41741                              |
| 0.08854                                                           | 80.233                           | 14.78759                              | 0.08854               | 67.685                           | 12.46389                              |
| 0.12749                                                           | 79.87                            | 14.72037                              | 0.12749               | 67.948                           | 12.51259                              |
| 0.18317                                                           | 81.388                           | 14.80148                              | 0.18317               | 67.084                           | 12.35259                              |
| 0.26376                                                           | 79.722                           | 14.69296                              | 0.26376               | 67.459                           | 12.42204                              |
| 0.37932                                                           | 81.011                           | 14.73167                              | 0.37932               | 66.186                           | 12.1863                               |
| 0.54549                                                           | 78.743                           | 14.51167                              | 0.54549               | 67.044                           | 12.34519                              |
| 0.7845                                                            | 76.814                           | 14.15444                              | 0.7845                | 65.045                           | 11.975                                |
| 1.1292                                                            | 74.488                           | 13.7237                               | 1.1292                | 62.198                           | 11.44778                              |
| 1.6235                                                            | 74                               | 13.13333                              | 1.6235                | 62.412                           | 11.18741                              |
| 2.3363                                                            | 65.745                           | 12.10463                              | 2.3363                | 57.488                           | 10.57556                              |
| 3.3598                                                            | 60.68                            | 11.16667                              | 3.3598                | 52.502                           | 9.65222                               |
| 3.3598                                                            | 59.194                           | 10.89148                              | 3.3598                | 52.47                            | 9.6463                                |
| 4.8321                                                            | 53.312                           | 9.80222                               | 4.8321                | 45.462                           | 8.34852                               |
| 6.9526                                                            | 50.319                           | 9.24796                               | 6.9526                | 41.667                           | 7.64574                               |
| 9.9994                                                            | 47.386                           | 8.70481                               | 9.9994                | 39.184                           | 7.18593                               |
| 21                                                                | 45.55                            | 8.36481                               | 21                    | 36.07                            | 6.60926                               |
| 31                                                                | 44.8                             | 8.22593                               | 31                    | 36.27                            | 6.6463                                |
| 41                                                                | 43.74                            | 8.02963                               | 41                    | 35.61                            | 6.52407                               |
| 49                                                                | 42.24                            | 7.75185                               | 49                    | 34.56                            | 6.32963                               |
| 61                                                                | 41.36                            | 7.58889                               | 61                    | 33.34                            | 6.1037                                |
| 72                                                                | 37.91                            | 7.45                                  | 72                    | 32.69                            | 5.98333                               |

<sup>a</sup> Measured longitudinal relaxation rate. <sup>b</sup> Relaxivity calculated from the following equation:  $r_1 = (R_1 - {}^{H_2O}r_1) / [Gd^{3+}]$ ,  ${}^{H_2O}r_1$  being the diamagnetic longitudinal relaxation rate of water (0.38 s<sup>-1</sup> at 25°C, 0.28 s<sup>-1</sup> at 37°C).



**Table S7.** NMRD raw data Gd.L<sub>3</sub>.

| <b>NMRD Data - Gd.L<sub>3</sub> - [Gd<sup>3+</sup>] = 7.76 mM</b> |                                  |                                       |                       |                                  |                                       |
|-------------------------------------------------------------------|----------------------------------|---------------------------------------|-----------------------|----------------------------------|---------------------------------------|
| <b>25 °C</b>                                                      |                                  |                                       | <b>37 °C</b>          |                                  |                                       |
| <b>Magnetic Field</b>                                             | <b>R<sub>1</sub><sup>a</sup></b> | <b>r<sub>1</sub><sup>b</sup></b>      | <b>Magnetic Field</b> | <b>R<sub>1</sub><sup>a</sup></b> | <b>r<sub>1</sub><sup>b</sup></b>      |
| <b>MHz</b>                                                        | <b>s<sup>-1</sup></b>            | <b>mM<sup>-1</sup> s<sup>-1</sup></b> | <b>MHz</b>            | <b>s<sup>-1</sup></b>            | <b>mM<sup>-1</sup> s<sup>-1</sup></b> |
| 0.00997                                                           | 127                              | 16.31701                              | 0.00997               | 103                              | 13.23711                              |
| 0.0144                                                            | 128                              | 16.44588                              | 0.0144                | 104                              | 13.36598                              |
| 0.0207                                                            | 129                              | 16.57474                              | 0.0207                | 103                              | 13.23711                              |
| 0.0297                                                            | 126                              | 16.18814                              | 0.0297                | 104                              | 13.36598                              |
| 0.0429                                                            | 126                              | 16.18814                              | 0.0429                | 103                              | 13.23711                              |
| 0.0616                                                            | 128                              | 16.44588                              | 0.0616                | 103                              | 13.23711                              |
| 0.0885                                                            | 126                              | 16.18814                              | 0.0885                | 102                              | 13.10825                              |
| 0.127                                                             | 130                              | 16.70361                              | 0.127                 | 104                              | 13.36598                              |
| 0.183                                                             | 127                              | 16.31701                              | 0.183                 | 102                              | 13.10825                              |
| 0.264                                                             | 128                              | 16.44588                              | 0.264                 | 101                              | 12.97938                              |
| 0.379                                                             | 126                              | 16.18814                              | 0.379                 | 103                              | 13.23711                              |
| 0.545                                                             | 125                              | 16.05928                              | 0.545                 | 100                              | 12.85052                              |
| 0.785                                                             | 124                              | 15.93041                              | 0.785                 | 98                               | 12.59278                              |
| 1.13                                                              | 119                              | 15.28608                              | 1.13                  | 97.2                             | 12.48969                              |
| 1.62                                                              | 113                              | 14.51289                              | 1.62                  | 93                               | 11.94845                              |
| 2.34                                                              | 102                              | 13.09536                              | 2.34                  | 84.5                             | 10.81443                              |
| 3.36                                                              | 89.9                             | 11.53608                              | 3.36                  | 73.9                             | 9.48711                               |
| 4.83                                                              | 79.1                             | 10.14433                              | 4.83                  | 65.3                             | 8.37887                               |
| 6.95                                                              | 68.4                             | 8.76546                               | 6.95                  | 56.9                             | 7.29639                               |
| 10                                                                | 62.8                             | 8.04381                               | 10                    | 49.6                             | 6.35567                               |
| 21                                                                | 59.4                             | 7.60567                               | 21                    | 45.7                             | 5.85309                               |
| 31                                                                | 58                               | 7.42526                               | 31                    | 44                               | 5.63402                               |
| 41                                                                | 56.9                             | 7.28351                               | 41                    | 43.4                             | 5.5567                                |
| 49                                                                | 56.4                             | 7.21907                               | 49                    | 42.9                             | 5.49227                               |
| 61                                                                | 55.3                             | 7.07732                               | 61                    | 42.6                             | 5.45361                               |
| 72                                                                | 55.1                             | 7.05155                               | 72                    | 41.7                             | 5.33763                               |

<sup>a</sup> Measured longitudinal relaxation rate. <sup>b</sup> Relaxivity calculated from the following equation:  $r_1 = (R_1 - {}^{H_2O}r_1) / [Gd^{3+}]$ ,  ${}^{H_2O}r_1$  being the diamagnetic longitudinal relaxation rate of water (0.38 s<sup>-1</sup> at 25°C, 0.28 s<sup>-1</sup> at 37°C).

**Table S8.** NMRD raw data Gd.L<sub>4</sub>.

| <b>NMRD Data - Gd.L<sub>4</sub> - [Gd<sup>3+</sup>] = 7.51 mM</b> |                                  |                                       |                       |                                  |                                       |
|-------------------------------------------------------------------|----------------------------------|---------------------------------------|-----------------------|----------------------------------|---------------------------------------|
| <b>25 °C</b>                                                      |                                  |                                       | <b>37 °C</b>          |                                  |                                       |
| <b>Magnetic Field</b>                                             | <b>R<sub>1</sub><sup>a</sup></b> | <b>r<sub>1</sub><sup>b</sup></b>      | <b>Magnetic Field</b> | <b>R<sub>1</sub><sup>a</sup></b> | <b>r<sub>1</sub><sup>b</sup></b>      |
| <b>MHz</b>                                                        | <b>s<sup>-1</sup></b>            | <b>mM<sup>-1</sup> s<sup>-1</sup></b> | <b>MHz</b>            | <b>s<sup>-1</sup></b>            | <b>mM<sup>-1</sup> s<sup>-1</sup></b> |
| 0.00997                                                           | 139                              | 18.45806                              | 0.00997               | 109                              | 14.4767                               |
| 0.0144                                                            | 140                              | 18.59121                              | 0.0144                | 108                              | 14.34354                              |
| 0.0207                                                            | 139                              | 18.45806                              | 0.0207                | 108                              | 14.34354                              |
| 0.0297                                                            | 137                              | 18.19174                              | 0.0297                | 109                              | 14.4767                               |
| 0.0429                                                            | 140                              | 18.59121                              | 0.0429                | 109                              | 14.4767                               |
| 0.0616                                                            | 142                              | 18.85752                              | 0.0616                | 109                              | 14.4767                               |
| 0.0885                                                            | 141                              | 18.72437                              | 0.0885                | 109                              | 14.4767                               |
| 0.127                                                             | 138                              | 18.3249                               | 0.127                 | 110                              | 14.60985                              |
| 0.183                                                             | 139                              | 18.45806                              | 0.183                 | 108                              | 14.34354                              |
| 0.264                                                             | 139                              | 18.45806                              | 0.264                 | 109                              | 14.4767                               |
| 0.379                                                             | 139                              | 18.45806                              | 0.379                 | 109                              | 14.4767                               |
| 0.545                                                             | 135                              | 17.92543                              | 0.545                 | 105                              | 13.94407                              |
| 0.785                                                             | 133                              | 17.65912                              | 0.785                 | 104                              | 13.81092                              |
| 1.13                                                              | 126                              | 16.72703                              | 1.13                  | 102                              | 13.54461                              |
| 1.62                                                              | 120                              | 15.9281                               | 1.62                  | 96.8                             | 12.8522                               |
| 2.34                                                              | 110                              | 14.59654                              | 2.34                  | 89.7                             | 11.90679                              |
| 3.36                                                              | 96                               | 12.73236                              | 3.36                  | 76.1                             | 10.09587                              |
| 4.83                                                              | 84.8                             | 11.24101                              | 4.83                  | 65.2                             | 8.64447                               |
| 6.95                                                              | 75.5                             | 10.00266                              | 6.95                  | 60.4                             | 8.00533                               |
| 10                                                                | 71.3                             | 9.44341                               | 10                    | 54                               | 7.15313                               |
| 21                                                                | 69                               | 9.13715                               | 21                    | 53.5                             | 7.08655                               |
| 31                                                                | 69                               | 9.13715                               | 31                    | 52.5                             | 6.9534                                |
| 41                                                                | 67.8                             | 8.97736                               | 41                    | 51.8                             | 6.86019                               |
| 49                                                                | 66.5                             | 8.80426                               | 49                    | 50.9                             | 6.74035                               |
| 61                                                                | 65                               | 8.60453                               | 61                    | 49.7                             | 6.58056                               |
| 72                                                                | 64.1                             | 8.48469                               | 72                    | 49.5                             | 6.55393                               |

<sup>a</sup> Measured longitudinal relaxation rate. <sup>b</sup> Relaxivity calculated from the following equation:  $r_1 = (R_1 - {}^{H_2O}r_1) / [Gd^{3+}]$ ,  ${}^{H_2O}r_1$  being the diamagnetic longitudinal relaxation rate of water (0.38 s<sup>-1</sup> at 25°C, 0.28 s<sup>-1</sup> at 37°C).

#### 4.4 Fitted NMRD Profiles of Gd.L<sub>1-4</sub>

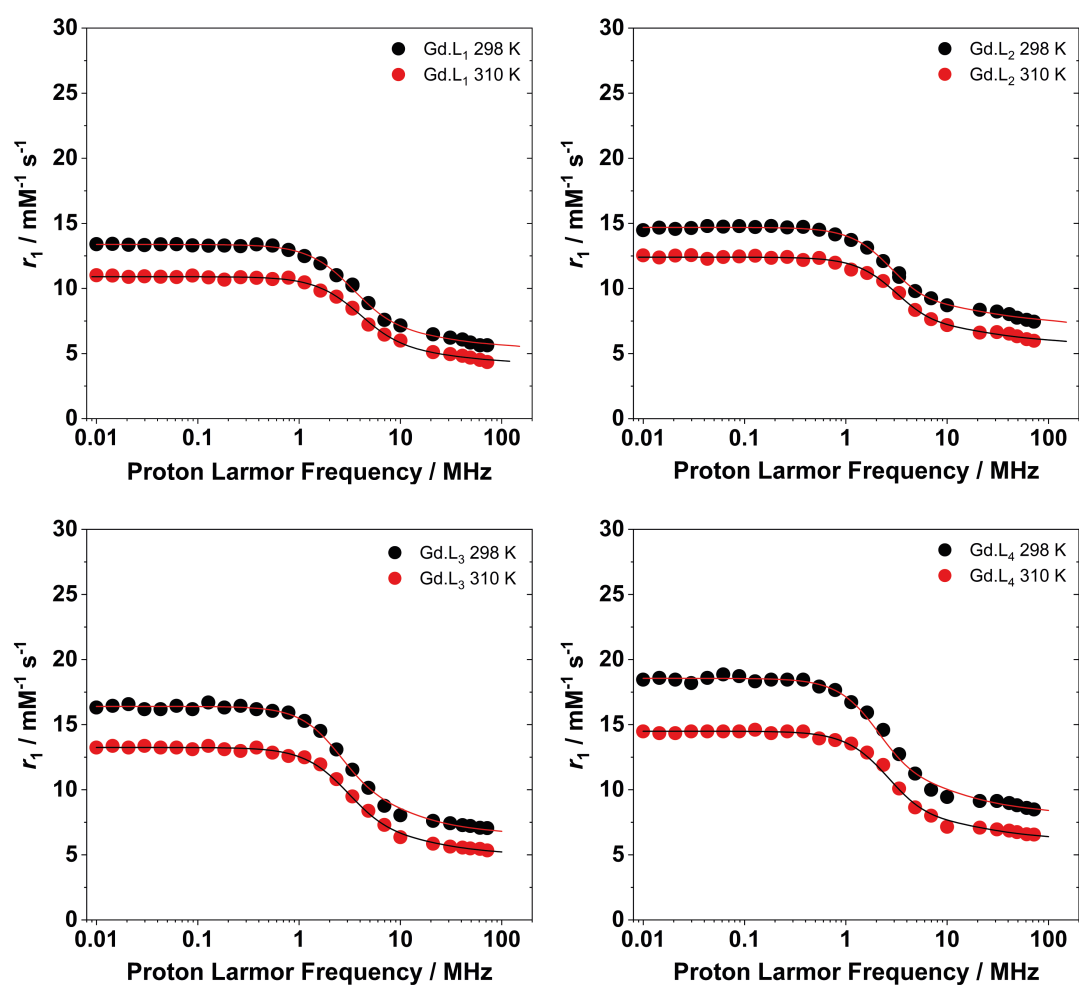

**Figure S9.** Fitted NMRD profiles of synthesised Gd.L<sub>1-4</sub> complexes at 25 and 37 °C. Solid red and black lines correspond to the fitting of data sets.

#### 4.5 <sup>17</sup>O NMR Raw Data Gd Complexes

Table S9. Data  $^{17}\text{O}$  NMR Gd.L<sub>1</sub>.

| T<br>K                        | $10^3/\text{T}$<br>K <sup>-1</sup> | <sup>17</sup> O<br>dia<br>ppm | <sup>17</sup> O<br>para<br>ppm | $\chi^a$<br>Hz | <sup>17</sup> O<br>dia<br>ppm | <sup>17</sup> O<br>para<br>ppm | Shift <sup>b</sup><br>Hz | Real<br>Shift<br>Hz | $\Delta\omega_r^d$<br>rad/s | dw1/2<br>dia | dw1/2<br>para | R <sub>2</sub> p <sup>e</sup><br>s <sup>-1</sup> | Conc<br>mM | ln(1/T <sub>2r</sub> )        |
|-------------------------------|------------------------------------|-------------------------------|--------------------------------|----------------|-------------------------------|--------------------------------|--------------------------|---------------------|-----------------------------|--------------|---------------|--------------------------------------------------|------------|-------------------------------|
| 276.6                         | 3.615                              | 0.8707                        | 3.13                           | 153.16         | 3.89                          | 6.07                           | 147.7                    | -5.4                | -1.01E+5                    | 100.18       | 180.62        | 252.58                                           | 19.06      | 13.53205                      |
| 278.8                         | 3.587                              | 0.8988                        | 3.14                           | 152.01         | 3.82                          | 6.19                           | 160.9                    | 8.9                 | 1.66E+5                     | 91.72        | 178.96        | 273.93                                           | 19.06      | 13.61320                      |
| 284.4                         | 3.516                              | 0.9741                        | 3.16                           | 148.45         | 3.60                          | 5.55                           | 132.4                    | -16.1               | -3.02E+5                    | 74.14        | 200.11        | 395.55                                           | 19.00      | 13.98058                      |
| 289.7                         | 3.452                              | 1.0646                        | 3.19                           | 144.27         | 3.33                          | 5.38                           | 139.2                    | -5.1                | -9.55E+4                    | 58.38        | 223.49        | 518.45                                           | 18.80      | 14.25115                      |
| 295.5                         | 3.384                              | 1.1219                        | 3.21                           | 141.57         | 3.14                          | 5.04                           | 128.5                    | -13.1               | -2.46E+5                    | 50.42        | 241.507       | 600.01                                           | 18.82      | 14.39727                      |
| 300.0                         | 3.333                              | 1.1978                        | 3.24                           | 138.12         | 2.90                          | 4.60                           | 115.4                    | -22.7               | -4.26E+5                    | 42.13        | 251.77        | 658.27                                           | 18.64      | 14.48993                      |
| 303.2                         | 3.298                              | 1.2630                        | 3.25                           | 135.02         | 2.66                          | 4.13                           | 99.4                     | -35.7               | -6.68E+5                    | 36.32        | 254.34        | 684.58                                           | 18.42      | 14.52913                      |
| 308.5                         | 3.242                              | 1.3265                        | 3.28                           | 132.09         | 2.44                          | 3.64                           | 81.3                     | -50.7               | -9.51E+5                    | 32.01        | 232.70        | 630.17                                           | 18.33      | 14.4463                       |
| 313.9                         | 3.186                              | 1.3888                        | 3.29                           | 129.19         | 2.21                          | 3.59                           | 93.6                     | -35.6               | -6.67E+5                    | 28.11        | 201.85        | 545.54                                           | 18.24      | 14.30210                      |
| 319.3                         | 3.132                              | 1.4482                        | 3.32                           | 126.57         | 1.99                          | 3.08                           | 73.6                     | -53.0               | -9.92E+5                    | 25.04        | 163.95        | 436.18                                           | 18.18      | 14.07837                      |
| 324.7                         | 3.079                              | 1.5066                        | 3.34                           | 124.26         | 1.76                          | 2.98                           | 82.4                     | -41.9               | -7.85E+5                    | 22.31        | 133.85        | 350.24                                           | 18.15      | 13.85892                      |
| 330.1                         | 3.029                              | 1.5639                        | 3.36                           | 121.52         | 1.54                          | 2.66                           | 76.1                     | -45.4               | -8.51E+5                    | 20.15        | 106.73        | 271.86                                           | 18.04      | 13.60561                      |
| 335.4                         | 2.982                              | 1.6198                        | 3.38                           | 119.21         | 1.32                          | 2.41                           | 73.9                     | -45.3               | -8.49E+5                    | 18.91        | 85.42         | 208.84                                           | 17.98      | 13.34190                      |
| 340.4                         | 2.938                              | 1.6748                        | 3.40                           | 117.04         | 1.09                          | 2.17                           | 73.3                     | -43.7               | -8.19E+5                    | 17.00        | 70.49         | 167.96                                           | 17.92      | 13.12403                      |
| 345.8                         | 2.892                              | 1.7282                        | 3.43                           | 115.02         | 0.86                          | 1.94                           | 72.7                     | -42.3               | -7.93E+5                    | 15.42        | 56.39         | 128.65                                           | 17.89      | 12.85738                      |
| 351.5                         | 2.845                              | 1.7798                        | 3.45                           | 113.23         | 0.64                          | 1.70                           | 72.0                     | -41.2               | -7.72E+5                    | 14.18        | 46.36         | 101.05                                           | 17.90      | 12.61589                      |
| <b>PM<sup>f</sup> 3.35E-4</b> |                                    |                               |                                |                |                               |                                |                          |                     |                             |              |               |                                                  |            | <b>PM<sup>f</sup> 3.35E-4</b> |
|                               |                                    |                               |                                |                |                               |                                |                          |                     |                             |              |               |                                                  |            | <b>q 1.0</b>                  |

<sup>a</sup>  $\chi = (^{17}\text{O}_{\text{para}} - ^{17}\text{O}_{\text{dia}}) \times 67.8$ . <sup>b</sup> Shift =  $(^{17}\text{O}_{\text{para}} - ^{17}\text{O}_{\text{dia}}) \times 67.8$ . <sup>c</sup> Real-Shift =  $((^{17}\text{O}_{\text{para}} - ^{17}\text{O}_{\text{dia}}) - (^{17}\text{O}_{\text{para}} - ^{17}\text{O}_{\text{dia}})) \times 67.8$ . <sup>d</sup>  $\Delta\omega_r = (\text{Real-Shift} \times 2\pi) / \text{PM}$ . <sup>e</sup> R<sub>2</sub>p =  $(\text{dw}1/2_{\text{par}} - \text{dw}1/2_{\text{dia}}) \times \pi$ . <sup>f</sup> PM =  $(q \times 0.001 \times ^{310}[\text{Gd}] / (55.56 + (q \times 0.001 \times ^{310}[\text{Gd}])))$ .

Table S10. Data  $^{17}\text{O}$  NMR GdL<sub>2</sub>.

| T<br>set<br>K | T<br>K | $10^3/T$<br>K <sup>-1</sup> | 'BuOH<br>dia<br>ppm | 'BuOH<br>para<br>ppm | $\chi^a$<br>Hz | $^{17}\text{O}$<br>dia<br>ppm | $^{17}\text{O}$<br>para<br>ppm | Shift <sup>b</sup><br>Hz | Real<br>Shift<br>Hz | $\Delta\omega_r^d$<br>rad/s | dw1/2<br>dia<br>para | dw1/2<br>para | $R_2p^e$<br>s <sup>-1</sup> | Conc<br>mM | $\ln(1/T_2)$                  |
|---------------|--------|-----------------------------|---------------------|----------------------|----------------|-------------------------------|--------------------------------|--------------------------|---------------------|-----------------------------|----------------------|---------------|-----------------------------|------------|-------------------------------|
| 278           | 276.6  | 3.615329                    | 0.8719              | 2.7989               | 130.6506       | 3.9269                        | 5.8404                         | 129.7                    | -0.9                | -1.97E+4                    | 99.93                | 179.04        | 248.41                      | 16.26      | 13.654                        |
| 280           | 278.8  | 3.586801                    | 0.8989              | 2.8150               | 129.9116       | 3.8170                        | 5.6022                         | 121.0                    | -8.9                | -1.91E+5                    | 91.97                | 180.29        | 277.32                      | 16.29      | 13.764                        |
| 285           | 284.4  | 3.516174                    | 0.9738              | 2.8535               | 127.4437       | 3.5702                        | 5.3746                         | 122.3                    | -5.1                | -1.10E+5                    | 73.56                | 197.20        | 388.23                      | 16.30      | 14.101                        |
| 290           | 289.7  | 3.451847                    | 1.0468              | 2.8854               | 124.6571       | 3.3759                        | 4.9383                         | 105.9                    | -18.7               | -4.03E+5                    | 60.70                | 228.22        | 526.01                      | 16.24      | 14.404                        |
| 295           | 295.5  | 3.384294                    | 1.1197              | 2.9203               | 122.0807       | 3.1374                        | 4.6435                         | 102.1                    | -20.0               | -4.30E+5                    | 50.67                | 239.83        | 593.96                      | 16.23      | 14.526                        |
| 305           | 303.2  | 3.297901                    | 1.2649              | 2.9677               | 115.4498       | 2.6770                        | 4.1770                         | 101.7                    | -13.7               | -2.96E+5                    | 36.40                | 250.48        | 672.20                      | 15.75      | 14.650                        |
| 310           | 308.5  | 3.241491                    | 1.3274              | 2.9911               | 112.7989       | 2.4540                        | 3.8330                         | 93.5                     | -19.3               | -4.15E+5                    | 31.81                | 226.48        | 611.26                      | 15.65      | 14.554                        |
| 315           | 313.9  | 3.186235                    | 1.3887              | 3.0157               | 110.3106       | 2.2220                        | 3.5090                         | 87.3                     | -23.1               | -4.96E+5                    | 28.03                | 196.14        | 527.86                      | 15.57      | 14.408                        |
| 320           | 319.3  | 3.131851                    | 1.4480              | 3.0457               | 108.3241       | 2.0030                        | 3.1580                         | 78.3                     | -30.0               | -6.46E+5                    | 24.99                | 162.47        | 431.67                      | 15.56      | 14.207                        |
| 325           | 324.7  | 3.07941                     | 1.5060              | 3.0666               | 105.8087       | 1.7750                        | 2.9480                         | 79.5                     | -26.3               | -5.66E+5                    | 22.35                | 132.95        | 347.26                      | 15.46      | 13.989                        |
| 330           | 330.1  | 3.029385                    | 1.5636              | 3.0922               | 103.6391       | 1.5520                        | 2.6760                         | 76.2                     | -27.4               | -5.90E+5                    | 20.20                | 107.41        | 273.86                      | 15.39      | 13.752                        |
| 335           | 335.4  | 2.981636                    | 1.6199              | 3.1167               | 101.483        | 1.3280                        | 2.4240                         | 74.3                     | -27.2               | -5.85E+5                    | 18.33                | 85.82         | 211.91                      | 15.31      | 13.495                        |
|               |        |                             |                     |                      |                |                               |                                |                          |                     |                             |                      |               |                             |            | <b>PM<sup>f</sup> 2.92E-4</b> |
|               |        |                             |                     |                      |                |                               |                                |                          |                     |                             |                      |               |                             |            | <b>q 1.0</b>                  |

<sup>a</sup>  $\chi = ({}^1\text{BuOH}_{para} - {}^1\text{BuOH}_{dia}) \times 67.8$ . <sup>b</sup> Shift =  $({}^{17}\text{O}_{para} - {}^{17}\text{O}_{dia}) \times 67.8$ . <sup>c</sup> Real-Shift =  $(({}^{17}\text{O}_{para} - {}^{17}\text{O}_{dia}) - ({}^{17}\text{O}_{para} - {}^{17}\text{O}_{dia})) \times 67.8$ . <sup>d</sup>  $\Delta\omega_r = (\text{Real-Shift} \times 2\pi)/\text{PM}$ . <sup>e</sup>  $R_2p = (\text{dw}1/2_{par} - \text{dw}1/2_{dia}) \times \pi$ . <sup>f</sup> PM =  $(q \times 0.001 \times {}^{310}[\text{Gd}]/(55.56 + (q \times 0.001 \times {}^{310}[\text{Gd}])))$ .

Table S11. Data  $^{17}\text{O}$  NMR Gd.L<sub>3</sub>.

| T<br>set<br>K | T<br>K | $10^3/T$<br>K <sup>-1</sup> | 'BuOH<br>dia<br>ppm | 'BuOH<br>para<br>ppm | $\chi^a$<br>Hz | $^{17}\text{O}$<br>dia<br>ppm | $^{17}\text{O}$<br>para<br>ppm | Shift <sup>b</sup><br>Hz | Real<br>Shift<br>Hz | $\Delta\omega_r^d$<br>rad/s | dw1/2<br>dia | dw1/2<br>para | R <sub>2</sub> p <sup>e</sup><br>s <sup>-1</sup> | Conc<br>mM | ln(1/T <sub>2</sub> )         |
|---------------|--------|-----------------------------|---------------------|----------------------|----------------|-------------------------------|--------------------------------|--------------------------|---------------------|-----------------------------|--------------|---------------|--------------------------------------------------|------------|-------------------------------|
| 278           | 276.6  | 3.615329                    | 0.8735              | 2.7346               | 126.1826       | 3.8658                        | 5.7538                         | 128.0                    | 1.8                 | 4.0877E+4                   | 98.77        | 190.24        | 287.22                                           | 15.70      | 13.8397392                    |
| 280           | 278.8  | 3.586801                    | 0.8998              | 2.7493               | 125.3961       | 3.8191                        | 5.7946                         | 133.9                    | 8.5                 | 1.9147E+5                   | 91.22        | 197.29        | 333.06                                           | 15.73      | 13.9878274                    |
| 285           | 284.4  | 3.516174                    | 0.9755              | 2.7831               | 122.5553       | 3.5941                        | 5.4263                         | 124.2                    | 1.7                 | 3.7382E+4                   | 73.14        | 213.71        | 441.39                                           | 15.68      | 14.2694337                    |
| 290           | 289.7  | 3.451847                    | 1.0486              | 2.8142               | 119.7077       | 3.3687                        | 5.0131                         | 111.5                    | -8.2                | -1.8417E+5                  | 60.62        | 228.88        | 528.34                                           | 15.60      | 14.4492385                    |
| 295           | 295.5  | 3.384294                    | 1.1210              | 2.8445               | 116.8533       | 3.1446                        | 4.5745                         | 96.9                     | -19.9               | -4.4615E+5                  | 50.25        | 245.05        | 611.67                                           | 15.53      | 14.5957015                    |
| 300           | 300.0  | 3.333333                    | 1.1665              | 2.8694               | 115.4566       | 2.9763                        | 4.3310                         | 91.8                     | -23.6               | -5.2912E+5                  | 44.95        | 241.40        | 616.85                                           | 15.58      | 14.6041361                    |
| 305           | 303.2  | 3.297901                    | 1.2512              | 2.9039               | 112.0531       | 2.6942                        | 3.8449                         | 78.0                     | -34.0               | -7.6283E+5                  | 37.15        | 224.82        | 589.28                                           | 15.28      | 14.5584132                    |
| 310           | 308.5  | 3.241491                    | 1.3212              | 2.9349               | 109.4089       | 2.4513                        | 3.5668                         | 75.6                     | -33.8               | -7.5705E+5                  | 32.01        | 192.81        | 504.91                                           | 15.18      | 14.4038895                    |
| 315           | 313.9  | 3.186235                    | 1.3854              | 2.9622               | 106.907        | 2.2201                        | 3.1795                         | 65.0                     | -41.9               | -9.3819E+5                  | 28.44        | 157.48        | 405.19                                           | 15.09      | 14.1838506                    |
| 320           | 319.3  | 3.131851                    | 1.4465              | 2.9889               | 104.5747       | 1.9931                        | 2.9487                         | 64.8                     | -39.8               | -8.9169E+5                  | 25.21        | 130.78        | 331.49                                           | 15.02      | 13.9831024                    |
| 325           | 324.7  | 3.07941                     | 1.5056              | 3.0154               | 102.3644       | 1.7642                        | 2.6883                         | 62.7                     | -39.7               | -8.9002E+5                  | 22.39        | 103.16        | 253.62                                           | 14.95      | 13.7153338                    |
| 330           | 330.1  | 3.029385                    | 1.5630              | 3.0423               | 100.2965       | 1.5440                        | 2.4684                         | 62.7                     | -37.6               | -8.4321E+5                  | 20.15        | 84.50         | 202.06                                           | 14.89      | 13.4880651                    |
| 335           | 335.4  | 2.981636                    | 1.6186              | 3.0689               | 98.33034       | 1.3190                        | 2.2256                         | 61.5                     | -36.9               | -8.2620E+5                  | 18.16        | 68.33         | 157.53                                           | 14.83      | 13.2391454                    |
| 340           | 340.4  | 2.937751                    | 1.6731              | 3.0983               | 96.62856       | 1.0931                        | 2.0004                         | 61.5                     | -35.1               | -7.8699E+5                  | 17.17        | 56.14         | 122.37                                           | 14.80      | 12.9865203                    |
| 345           | 345.8  | 2.891781                    | 1.7266              | 3.1268               | 94.93356       | 0.8681                        | 1.7399                         | 59.1                     | -35.8               | -8.0295E+5                  | 15.59        | 46.44         | 96.87                                            | 14.77      | 12.7528649                    |
| 350           | 351.5  | 2.84486                     | 1.7784              | 3.1567               | 93.44874       | 0.6440                        | 1.5153                         | 59.1                     | -34.4               | -7.7043E+5                  | 14.35        | 39.39         | 78.63                                            | 14.78      | 12.5442027                    |
|               |        |                             |                     |                      |                |                               |                                |                          |                     |                             |              |               |                                                  |            | <b>PM<sup>f</sup> 2.80E-4</b> |
|               |        |                             |                     |                      |                |                               |                                |                          |                     |                             |              |               |                                                  |            | <b>q 1.0</b>                  |

<sup>a</sup>  $\chi = ({}^1\text{BuOH}_{\text{para}} - {}^1\text{BuOH}_{\text{dia}}) \times 67.8$ . <sup>b</sup> Shift =  $({}^{17}\text{O}_{\text{para}} - {}^{17}\text{O}_{\text{dia}}) \times 67.8$ . <sup>c</sup> Real-Shift =  $(({}^{17}\text{O}_{\text{para}} - {}^{17}\text{O}_{\text{dia}}) - ({}^{17}\text{O}_{\text{para}} - {}^{17}\text{O}_{\text{dia}})) \times 67.8$ . <sup>d</sup>  $\Delta\omega_r = (\text{Real-Shift} \times 2\pi)/\text{PM}$ .  
<sup>e</sup>  $R_{2p} = (\text{dw}1/2_{\text{para}} - \text{dw}1/2_{\text{dia}}) \times \pi$ . <sup>f</sup> PM =  $(q \times 0.001 \times {}^{310}[\text{Gd}]/(55.56 + (q \times 0.001 \times {}^{310}[\text{Gd}])))$ .

Table S12. Data  $^{17}\text{O}$  NMR Gd.L<sub>4</sub>.

| T<br>set<br>K | T<br>K | $10^3/T$<br>K <sup>-1</sup> | 'BuOH<br>dia<br>ppm | 'BuOH<br>para<br>ppm | $\chi^a$<br>Hz | $^{17}\text{O}$<br>dia<br>ppm | $^{17}\text{O}$<br>para<br>ppm | Shift <sup>b</sup><br>Hz | Real<br>Shift<br>Hz | $\Delta\omega_r^d$<br>rad/s | dw1/2<br>dia | dw1/2<br>para | R <sub>2</sub> p <sup>e</sup><br>s <sup>-1</sup> | Conc<br>mM | ln(1/T <sub>2</sub> )         |
|---------------|--------|-----------------------------|---------------------|----------------------|----------------|-------------------------------|--------------------------------|--------------------------|---------------------|-----------------------------|--------------|---------------|--------------------------------------------------|------------|-------------------------------|
| 278           | 276.6  | 3.615329                    | 0.8725              | 2.6792               | 122.4943       | 3.9031                        | 5.6204                         | 116.4                    | -6.1                | -1.4188E+5                  | 99.51        | 182.86        | 261.72                                           | 15.24      | 13.7902108                    |
| 280           | 278.8  | 3.586801                    | 0.8994              | 2.6932               | 121.6196       | 3.8571                        | 5.4527                         | 108.2                    | -13.4               | -3.1455E+5                  | 92.05        | 176.80        | 266.12                                           | 15.25      | 13.8068679                    |
| 285           | 284.4  | 3.516174                    | 0.9752              | 2.7304               | 119.0026       | 3.5728                        | 5.2121                         | 111.1                    | -7.9                | -1.8394E+5                  | 73.64        | 176.72        | 323.67                                           | 15.22      | 14.0026676                    |
| 290           | 289.7  | 3.451847                    | 1.0478              | 2.7631               | 116.2973       | 3.3654                        | 4.9835                         | 109.7                    | -6.6                | -1.5426E+5                  | 60.70        | 186.09        | 393.72                                           | 15.15      | 14.1985911                    |
| 295           | 295.5  | 3.384294                    | 1.1211              | 2.7955               | 113.5243       | 3.1364                        | 4.4284                         | 87.6                     | -25.9               | -6.0688E+5                  | 50.59        | 186.42        | 426.51                                           | 15.09      | 14.2785663                    |
| 300           | 300.0  | 3.333333                    | 1.1983              | 2.8288               | 110.5479       | 2.8839                        | 4.2764                         | 94.4                     | -16.1               | -3.7771E+5                  | 41.88        | 189.66        | 464.03                                           | 14.92      | 14.3628869                    |
| 305           | 303.2  | 3.297901                    | 1.2637              | 2.8587               | 108.141        | 2.6580                        | 3.8557                         | 81.2                     | -26.9               | -6.3053E+5                  | 36.41        | 173.65        | 430.93                                           | 14.75      | 14.2888934                    |
| 310           | 308.5  | 3.241491                    | 1.3264              | 2.8896               | 105.985        | 2.4362                        | 3.5435                         | 75.1                     | -30.9               | -7.2353E+5                  | 31.84        | 149.27        | 368.73                                           | 14.71      | 14.1330046                    |
| 315           | 313.9  | 3.186235                    | 1.3877              | 2.9182               | 103.7679       | 2.2172                        | 3.2723                         | 71.5                     | -32.2               | -7.5448E+5                  | 28.28        | 131.86        | 325.24                                           | 14.65      | 14.0075064                    |
| 320           | 319.3  | 3.131851                    | 1.4474              | 2.9402               | 101.2118       | 1.9925                        | 2.9575                         | 65.4                     | -35.8               | -8.3764E+5                  | 25.13        | 107.39        | 258.30                                           | 14.54      | 13.7770472                    |
| 325           | 324.7  | 3.07941                     | 1.5059              | 2.9726               | 99.44226       | 1.7681                        | 2.7158                         | 64.3                     | -35.2               | -8.2367E+5                  | 22.47        | 88.48         | 207.27                                           | 14.53      | 13.5569684                    |
| 330           | 330.1  | 3.029385                    | 1.5633              | 2.9982               | 97.28622       | 1.5448                        | 2.4731                         | 62.9                     | -34.3               | -8.0399E+5                  | 20.23        | 72.56         | 164.32                                           | 14.45      | 13.324732                     |
| 335           | 335.4  | 2.981636                    | 1.6360              | 3.0674               | 97.04892       | 1.2565                        | 2.1969                         | 63.8                     | -33.3               | -7.7923E+5                  | 18.08        | 57.97         | 125.25                                           | 14.64      | 13.0532879                    |
| 340           | 340.4  | 2.937751                    | 1.6801              | 3.0884               | 95.48274       | 1.0692                        | 1.9749                         | 61.4                     | -34.1               | -7.9764E+5                  | 17.08        | 49.26         | 101.05                                           | 14.62      | 12.8385073                    |
| 345           | 345.8  | 2.891781                    | 1.7303              | 3.1118               | 93.6657        | 0.8545                        | 1.7537                         | 61.0                     | -32.7               | -7.6543E+5                  | 15.26        | 41.80         | 83.34                                            | 14.57      | 12.6458152                    |
| 350           | 351.5  | 2.84486                     | 1.7808              | 3.1396               | 92.12664       | 0.6365                        | 1.5216                         | 60.0                     | -32.1               | -7.5178E+5                  | 14.01        | 35.16         | 66.41                                            | 14.57      | 12.4188021                    |
|               |        |                             |                     |                      |                |                               |                                |                          |                     |                             |              |               |                                                  |            | <b>PM<sup>f</sup> 2.68E-4</b> |
|               |        |                             |                     |                      |                |                               |                                |                          |                     |                             |              |               |                                                  |            | <b>q 1.0</b>                  |

<sup>a</sup>  $\chi = ({}^1\text{BuOH}_{\text{para}} - {}^1\text{BuOH}_{\text{dia}}) \times 67.8$ . <sup>b</sup> Shift =  $({}^{17}\text{O}_{\text{para}} - {}^{17}\text{O}_{\text{dia}}) \times 67.8$ . <sup>c</sup> Real-Shift =  $(({}^{17}\text{O}_{\text{para}} - {}^{17}\text{O}_{\text{dia}}) - ({}^{17}\text{O}_{\text{para}} - {}^{17}\text{O}_{\text{dia}})) \times 67.8$ . <sup>d</sup>  $\Delta\omega_r = (\text{Real-Shift} \times 2\pi)/\text{PM}$ .  
<sup>e</sup> R<sub>2</sub>p =  $(\text{dw}1/2_{\text{para}} - \text{dw}1/2_{\text{dia}}) \times \pi$ . <sup>f</sup> PM =  $(q \times 0.001 \times {}^{310}[\text{Gd}]/(55.56 + (q \times 0.001 \times {}^{310}[\text{Gd}])))$ .

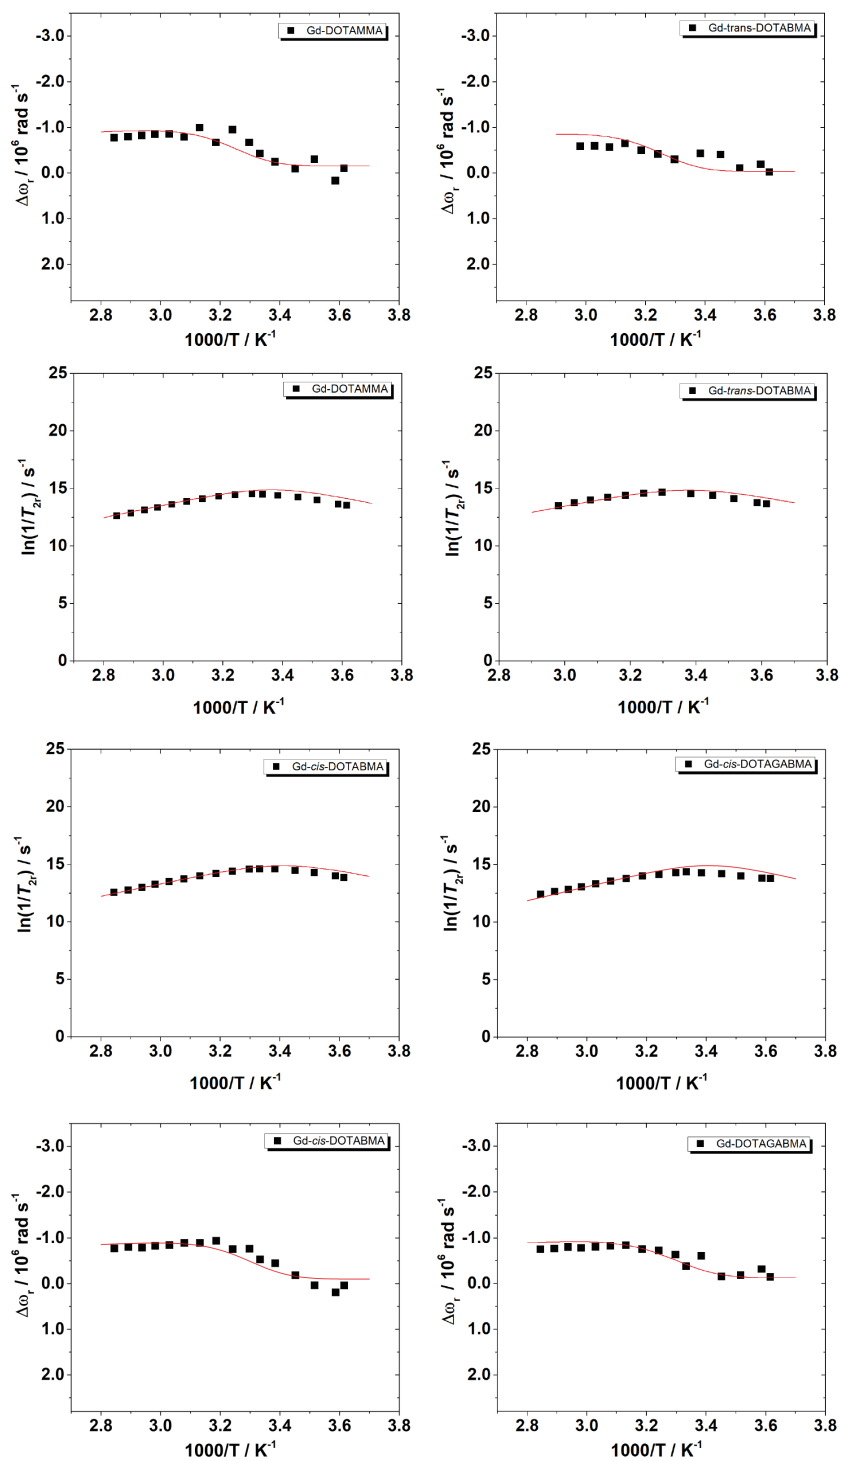

**Figure S10.** Graphs of the temperature dependence of the natural logarithm of the reduced transverse relaxation rate  $R_2$  ( $1/T_{2r}$ ) and of  $\Delta\omega$ .



#### 4.6 NMRD Raw Data and Fitted NMRD Profiles of Linear P(NAM-r-Gd.L<sub>1</sub>) polymers

Table S13. NMRD raw data P(NAM-r-1%-Gd.L<sub>1</sub>).

| NMRD Data - P(NAM-r-1%-Gd.L <sub>1</sub> ) - [Gd <sup>3+</sup> ] = 1.21 mM |                                                |                                                                 |                       |                                                |                                                                 |
|----------------------------------------------------------------------------|------------------------------------------------|-----------------------------------------------------------------|-----------------------|------------------------------------------------|-----------------------------------------------------------------|
| 25 °C                                                                      |                                                |                                                                 | 37 °C                 |                                                |                                                                 |
| Magnetic Field<br>MHz                                                      | R <sub>1</sub> <sup>a</sup><br>s <sup>-1</sup> | r <sub>1</sub> <sup>b</sup><br>mM <sup>-1</sup> s <sup>-1</sup> | Magnetic Field<br>MHz | R <sub>1</sub> <sup>a</sup><br>s <sup>-1</sup> | r <sub>1</sub> <sup>b</sup><br>mM <sup>-1</sup> s <sup>-1</sup> |
| 0.00997                                                                    | 28.661                                         | 23.5675                                                         | 0.00997               | 25.49                                          | 20.925                                                          |
| 0.01436                                                                    | 28.062                                         | 23.26833                                                        | 0.01436               | 25.427                                         | 20.8725                                                         |
| 0.0207                                                                     | 28.894                                         | 23.36167                                                        | 0.0207                | 25.924                                         | 21.28667                                                        |
| 0.02973                                                                    | 28.082                                         | 23.085                                                          | 0.02973               | 25.825                                         | 21.20417                                                        |
| 0.04287                                                                    | 27.745                                         | 22.80417                                                        | 0.04287               | 25.64                                          | 21.05                                                           |
| 0.06162                                                                    | 28.263                                         | 23.23583                                                        | 0.06162               | 25.764                                         | 21.15333                                                        |
| 0.08854                                                                    | 28.232                                         | 23.21                                                           | 0.08854               | 25.612                                         | 21.02667                                                        |
| 0.12749                                                                    | 27.702                                         | 22.76833                                                        | 0.12749               | 25.468                                         | 20.90667                                                        |
| 0.18317                                                                    | 27.633                                         | 22.71083                                                        | 0.18317               | 25.435                                         | 20.87917                                                        |
| 0.26376                                                                    | 27.335                                         | 22.4625                                                         | 0.26376               | 25.869                                         | 21.24083                                                        |
| 0.37932                                                                    | 27.63                                          | 22.70833                                                        | 0.37932               | 24.816                                         | 20.36333                                                        |
| 0.54549                                                                    | 27.114                                         | 22.27833                                                        | 0.54549               | 24.451                                         | 20.05917                                                        |
| 0.7845                                                                     | 25.609                                         | 21.02417                                                        | 0.7845                | 23.209                                         | 19.02417                                                        |
| 1.1292                                                                     | 24.74                                          | 20.3                                                            | 1.1292                | 22.526                                         | 18.455                                                          |
| 1.6235                                                                     | 23.012                                         | 18.86                                                           | 1.6235                | 21.042                                         | 17.21833                                                        |
| 2.3363                                                                     | 21.412                                         | 17.52667                                                        | 2.3363                | 19.001                                         | 15.5175                                                         |
| 3.3598                                                                     | 19.06                                          | 15.66667                                                        | 3.3598                | 17.007                                         | 13.85583                                                        |
| 3.3598                                                                     | 19.212                                         | 15.69333                                                        | 3.3598                | 17.368                                         | 14.05667                                                        |
| 4.8321                                                                     | 18.434                                         | 15.345                                                          | 4.8321                | 17.085                                         | 13.52083                                                        |
| 6.9526                                                                     | 20.435                                         | 16.7125                                                         | 6.9526                | 16.536                                         | 13.46333                                                        |
| 9.9994                                                                     | 20.867                                         | 17.0725                                                         | 9.9994                | 17.543                                         | 14.3025                                                         |
| 21                                                                         | 22.77                                          | 18.65833                                                        | 21                    | 18.82                                          | 15.36667                                                        |
| 31                                                                         | 22.48                                          | 18.41667                                                        | 31                    | 19.32                                          | 15.78333                                                        |
| 41                                                                         | 21.59                                          | 17.675                                                          | 41                    | 18.64                                          | 15.21667                                                        |
| 49                                                                         | 20.42                                          | 16.7                                                            | 49                    | 17.74                                          | 14.46667                                                        |
| 61                                                                         | 19.34                                          | 15.8                                                            | 61                    | 16.54                                          | 13.46667                                                        |
| 72                                                                         | 17.35                                          | 14.14167                                                        | 72                    | 15.13                                          | 12.29167                                                        |

<sup>a</sup> Measured longitudinal relaxation rate. <sup>b</sup> Relaxivity calculated from the following equation:  $r_1 = (R_1 - {}^{H_2O}r_1) / [\text{Gd}^{3+}]$ ,  ${}^{H_2O}r_1$  being the diamagnetic longitudinal relaxation rate of water (0.38 s<sup>-1</sup> at 25°C, 0.28 s<sup>-1</sup> at 37°C).

**Table S14.** NMRD raw data P(NAM-r-5%-Gd.L<sub>1</sub>).

| <b>NMRD Data - P(NAM-r-5%-Gd.L<sub>1</sub>) - [Gd<sup>3+</sup>] = 2.75 mM</b> |                                  |                                       |                       |                                  |                                       |
|-------------------------------------------------------------------------------|----------------------------------|---------------------------------------|-----------------------|----------------------------------|---------------------------------------|
| <b>25 °C</b>                                                                  |                                  |                                       | <b>37 °C</b>          |                                  |                                       |
| <b>Magnetic Field</b>                                                         | <b>R<sub>1</sub><sup>a</sup></b> | <b>r<sub>1</sub><sup>b</sup></b>      | <b>Magnetic Field</b> | <b>R<sub>1</sub><sup>a</sup></b> | <b>r<sub>1</sub><sup>b</sup></b>      |
| <b>MHz</b>                                                                    | <b>s<sup>-1</sup></b>            | <b>mM<sup>-1</sup> s<sup>-1</sup></b> | <b>MHz</b>            | <b>s<sup>-1</sup></b>            | <b>mM<sup>-1</sup> s<sup>-1</sup></b> |
| 0.00997                                                                       | 59.6                             | 21.55414                              | 0.00997               | 52.5                             | 19.00637                              |
| 0.0144                                                                        | 57.8                             | 20.899                                | 0.0144                | 53                               | 19.18835                              |
| 0.0207                                                                        | 59                               | 21.33576                              | 0.0207                | 52.7                             | 19.07916                              |
| 0.0297                                                                        | 59.7                             | 21.59054                              | 0.0297                | 52.7                             | 19.07916                              |
| 0.0429                                                                        | 60.2                             | 21.77252                              | 0.0429                | 52.1                             | 18.86078                              |
| 0.0616                                                                        | 58.6                             | 21.19017                              | 0.0616                | 52.6                             | 19.04277                              |
| 0.0885                                                                        | 59.6                             | 21.55414                              | 0.0885                | 52.2                             | 18.89718                              |
| 0.127                                                                         | 59.4                             | 21.48135                              | 0.127                 | 52                               | 18.82439                              |
| 0.183                                                                         | 59.7                             | 21.59054                              | 0.183                 | 52.2                             | 18.89718                              |
| 0.264                                                                         | 58.8                             | 21.26297                              | 0.264                 | 52                               | 18.82439                              |
| 0.379                                                                         | 58.5                             | 21.15378                              | 0.379                 | 51.5                             | 18.6424                               |
| 0.545                                                                         | 56.8                             | 20.53503                              | 0.545                 | 50.1                             | 18.13285                              |
| 0.785                                                                         | 54.9                             | 19.84349                              | 0.785                 | 48.1                             | 17.40491                              |
| 1.13                                                                          | 51.5                             | 18.60601                              | 1.13                  | 45.9                             | 16.60419                              |
| 1.62                                                                          | 48.4                             | 17.47771                              | 1.62                  | 42.6                             | 15.40309                              |
| 2.34                                                                          | 44.5                             | 16.05823                              | 2.34                  | 38.6                             | 13.94722                              |
| 3.36                                                                          | 40.4                             | 14.56597                              | 3.36                  | 35.4                             | 12.78253                              |
| 4.83                                                                          | 39.8                             | 14.34759                              | 4.83                  | 33                               | 11.90901                              |
| 6.95                                                                          | 40.1                             | 14.45678                              | 6.95                  | 33.2                             | 11.9818                               |
| 10                                                                            | 42.4                             | 15.2939                               | 10                    | 34.6                             | 12.49136                              |
| 21                                                                            | 47.1                             | 17.00455                              | 21                    | 39.5                             | 14.2748                               |
| 31                                                                            | 47                               | 16.96815                              | 31                    | 39.2                             | 14.16561                              |
| 41                                                                            | 45.3                             | 16.34941                              | 41                    | 38                               | 13.72884                              |
| 49                                                                            | 43.6                             | 15.73066                              | 49                    | 36.8                             | 13.29208                              |
| 61                                                                            | 40.9                             | 14.74795                              | 61                    | 35                               | 12.63694                              |
| 72                                                                            | 38.2                             | 13.76524                              | 72                    | 32.4                             | 11.69063                              |

<sup>a</sup> Measured longitudinal relaxation rate. <sup>b</sup> Relaxivity calculated from the following equation:  $r_1 = (R_1 - {}^{H_2O}r_1) / [Gd^{3+}]$ ,  ${}^{H_2O}r_1$  being the diamagnetic longitudinal relaxation rate of water (0.38 s<sup>-1</sup> at 25°C, 0.28 s<sup>-1</sup> at 37°C).

**Table S15.** NMRD raw data P(NAM-r-9%-Gd.L<sub>1</sub>).

| <b>NMRD Data - P(NAM-r-9%-Gd.L<sub>1</sub>) - [Gd<sup>3+</sup>] = 3.00 mM</b> |                                  |                                       |                       |                                  |                                       |
|-------------------------------------------------------------------------------|----------------------------------|---------------------------------------|-----------------------|----------------------------------|---------------------------------------|
| <b>25 °C</b>                                                                  |                                  |                                       | <b>37 °C</b>          |                                  |                                       |
| <b>Magnetic Field</b>                                                         | <b>R<sub>1</sub><sup>a</sup></b> | <b>r<sub>1</sub><sup>b</sup></b>      | <b>Magnetic Field</b> | <b>R<sub>1</sub><sup>a</sup></b> | <b>r<sub>1</sub><sup>b</sup></b>      |
| <b>MHz</b>                                                                    | <b>s<sup>-1</sup></b>            | <b>mM<sup>-1</sup> s<sup>-1</sup></b> | <b>MHz</b>            | <b>s<sup>-1</sup></b>            | <b>mM<sup>-1</sup> s<sup>-1</sup></b> |
| 0.00997                                                                       | 64.5                             | 21.35198                              | 0.00997               | 56.7                             | 18.78788                              |
| 0.0144                                                                        | 64.8                             | 21.45188                              | 0.0144                | 57.2                             | 18.95438                              |
| 0.0207                                                                        | 64.7                             | 21.41858                              | 0.0207                | 56.8                             | 18.82118                              |
| 0.0297                                                                        | 64.3                             | 21.28538                              | 0.0297                | 56.4                             | 18.68798                              |
| 0.0429                                                                        | 64.4                             | 21.31868                              | 0.0429                | 57.3                             | 18.98768                              |
| 0.0616                                                                        | 65.7                             | 21.75158                              | 0.0616                | 56.8                             | 18.82118                              |
| 0.0885                                                                        | 64.7                             | 21.41858                              | 0.0885                | 57.5                             | 19.05428                              |
| 0.127                                                                         | 64.6                             | 21.38528                              | 0.127                 | 56.7                             | 18.78788                              |
| 0.183                                                                         | 64.9                             | 21.48518                              | 0.183                 | 56.5                             | 18.72128                              |
| 0.264                                                                         | 63.7                             | 21.08558                              | 0.264                 | 55.5                             | 18.38828                              |
| 0.379                                                                         | 62.5                             | 20.68598                              | 0.379                 | 55.2                             | 18.28838                              |
| 0.545                                                                         | 61.4                             | 20.31968                              | 0.545                 | 54.1                             | 17.92208                              |
| 0.785                                                                         | 59.4                             | 19.65368                              | 0.785                 | 52.1                             | 17.25608                              |
| 1.13                                                                          | 56.7                             | 18.75458                              | 1.13                  | 49.3                             | 16.32368                              |
| 1.62                                                                          | 53.1                             | 17.55578                              | 1.62                  | 47.1                             | 15.59108                              |
| 2.34                                                                          | 49.2                             | 16.25708                              | 2.34                  | 42.5                             | 14.05927                              |
| 3.36                                                                          | 43.8                             | 14.45887                              | 3.36                  | 37.4                             | 12.36097                              |
| 4.83                                                                          | 43.2                             | 14.25907                              | 4.83                  | 35.3                             | 11.66167                              |
| 6.95                                                                          | 44                               | 14.52547                              | 6.95                  | 36.4                             | 12.02797                              |
| 10                                                                            | 46.8                             | 15.45788                              | 10                    | 37.8                             | 12.49417                              |
| 21                                                                            | 51.6                             | 17.05628                              | 21                    | 43.6                             | 14.42557                              |
| 31                                                                            | 51.6                             | 17.05628                              | 31                    | 43.3                             | 14.32567                              |
| 41                                                                            | 50                               | 16.52348                              | 41                    | 42                               | 13.89277                              |
| 49                                                                            | 47.9                             | 15.82418                              | 49                    | 40.5                             | 13.39327                              |
| 61                                                                            | 44.8                             | 14.79187                              | 61                    | 39                               | 12.89377                              |
| 72                                                                            | 41.8                             | 13.79287                              | 72                    | 36                               | 11.89477                              |

<sup>a</sup> Measured longitudinal relaxation rate. <sup>b</sup> Relaxivity calculated from the following equation:  $r_1 = (R_1 - {}^{H_2O}r_1) / [Gd^{3+}]$ ,  ${}^{H_2O}r_1$  being the diamagnetic longitudinal relaxation rate of water (0.38 s<sup>-1</sup> at 25°C, 0.28 s<sup>-1</sup> at 37°C).

**Table S16.** NMRD raw data P(NAM-r-17%-Gd.L<sub>1</sub>).

| <b>NMRD Data - P(NAM-r-17%-Gd.L<sub>1</sub>) - [Gd<sup>3+</sup>] = 2.67 mM</b> |                                  |                                       |                       |                                  |                                       |
|--------------------------------------------------------------------------------|----------------------------------|---------------------------------------|-----------------------|----------------------------------|---------------------------------------|
| <b>25 °C</b>                                                                   |                                  |                                       | <b>37 °C</b>          |                                  |                                       |
| <b>Magnetic Field</b>                                                          | <b>R<sub>1</sub><sup>a</sup></b> | <b>r<sub>1</sub><sup>b</sup></b>      | <b>Magnetic Field</b> | <b>R<sub>1</sub><sup>a</sup></b> | <b>r<sub>1</sub><sup>b</sup></b>      |
| <b>MHz</b>                                                                     | <b>s<sup>-1</sup></b>            | <b>mM<sup>-1</sup> s<sup>-1</sup></b> | <b>MHz</b>            | <b>s<sup>-1</sup></b>            | <b>mM<sup>-1</sup> s<sup>-1</sup></b> |
| 0.00997                                                                        | 57.8                             | 21.54597                              | 0.00997               | 50.4                             | 18.80675                              |
| 0.0144                                                                         | 58.2                             | 21.69606                              | 0.0144                | 51.2                             | 19.10694                              |
| 0.0207                                                                         | 57.7                             | 21.50844                              | 0.0207                | 51.6                             | 19.25704                              |
| 0.0297                                                                         | 58.4                             | 21.77111                              | 0.0297                | 51.8                             | 19.33208                              |
| 0.0429                                                                         | 57.1                             | 21.2833                               | 0.0429                | 51.9                             | 19.36961                              |
| 0.0616                                                                         | 58.6                             | 21.84615                              | 0.0616                | 51.2                             | 19.10694                              |
| 0.0885                                                                         | 57.4                             | 21.39587                              | 0.0885                | 51.4                             | 19.18199                              |
| 0.127                                                                          | 58.2                             | 21.69606                              | 0.127                 | 50.8                             | 18.95685                              |
| 0.183                                                                          | 57.4                             | 21.39587                              | 0.183                 | 50.5                             | 18.84428                              |
| 0.264                                                                          | 57.5                             | 21.4334                               | 0.264                 | 50.4                             | 18.80675                              |
| 0.379                                                                          | 56.7                             | 21.13321                              | 0.379                 | 49.4                             | 18.43152                              |
| 0.545                                                                          | 55.2                             | 20.57036                              | 0.545                 | 49.4                             | 18.43152                              |
| 0.785                                                                          | 53.7                             | 20.0075                               | 0.785                 | 47                               | 17.53096                              |
| 1.13                                                                           | 51.9                             | 19.33208                              | 1.13                  | 45.1                             | 16.81801                              |
| 1.62                                                                           | 48.5                             | 18.05629                              | 1.62                  | 42.6                             | 15.87992                              |
| 2.34                                                                           | 45.2                             | 16.81801                              | 2.34                  | 38.5                             | 14.34146                              |
| 3.36                                                                           | 40.8                             | 15.16698                              | 3.36                  | 34.4                             | 12.803                                |
| 4.83                                                                           | 39.4                             | 14.64165                              | 4.83                  | 32.5                             | 12.09006                              |
| 6.95                                                                           | 41.3                             | 15.3546                               | 6.95                  | 33.2                             | 12.35272                              |
| 10                                                                             | 43.4                             | 16.14259                              | 10                    | 35.3                             | 13.14071                              |
| 21                                                                             | 47.3                             | 17.606                                | 21                    | 40.2                             | 14.97936                              |
| 31                                                                             | 47.3                             | 17.606                                | 31                    | 40.3                             | 15.01689                              |
| 41                                                                             | 45.8                             | 17.04315                              | 41                    | 39.1                             | 14.5666                               |
| 49                                                                             | 43.9                             | 16.33021                              | 49                    | 37.6                             | 14.00375                              |
| 61                                                                             | 40.8                             | 15.16698                              | 61                    | 35.4                             | 13.17824                              |
| 72                                                                             | 38.1                             | 14.15385                              | 72                    | 33.3                             | 12.39024                              |

<sup>a</sup> Measured longitudinal relaxation rate. <sup>b</sup> Relaxivity calculated from the following equation:  $r_1 = (R_1 - {}^{H_2O}r_1) / [Gd^{3+}]$ ,  ${}^{H_2O}r_1$  being the diamagnetic longitudinal relaxation rate of water (0.38 s<sup>-1</sup> at 25°C, 0.28 s<sup>-1</sup> at 37°C).

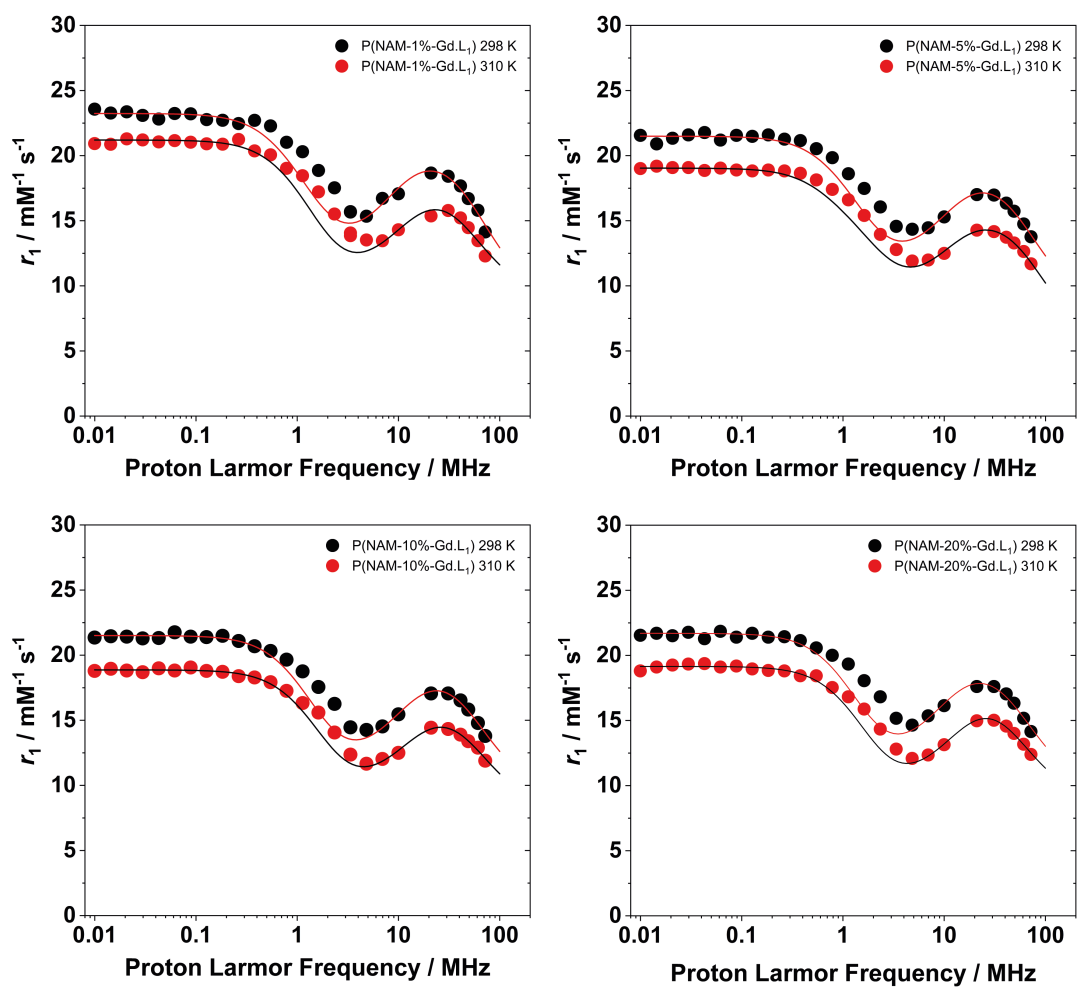

**Figure S11.** Fitted NMRD profiles of synthesised **Gd.L<sub>1-4</sub>** complexes at 25 and 37 °C. Solid red and black lines correspond to the fitting of data sets, respectively.

#### 4.7 NMRD Raw Data and Fitted NMRD Profiles of Hyperbranched P(NAM-r-Gd.L<sub>2-4</sub>) Polymers

Table S17. NMRD DATA P(NAM-r-0.9%-Gd.L<sub>2</sub>).

| NMRD Data - P(NAM-r-0.9%-Gd.L <sub>2</sub> ) - [Gd <sup>3+</sup> ] = 0.70 mM |                                                |                                                                 |                       |                                                |                                                                 |
|------------------------------------------------------------------------------|------------------------------------------------|-----------------------------------------------------------------|-----------------------|------------------------------------------------|-----------------------------------------------------------------|
| 25 °C                                                                        |                                                |                                                                 | 37 °C                 |                                                |                                                                 |
| Magnetic Field<br>MHz                                                        | R <sub>1</sub> <sup>a</sup><br>s <sup>-1</sup> | r <sub>1</sub> <sup>b</sup><br>mM <sup>-1</sup> s <sup>-1</sup> | Magnetic Field<br>MHz | R <sub>1</sub> <sup>a</sup><br>s <sup>-1</sup> | r <sub>1</sub> <sup>b</sup><br>mM <sup>-1</sup> s <sup>-1</sup> |
| 0.00997                                                                      | 20.19                                          | 28.3                                                            | 0.00997               | 19.742                                         | 27.66                                                           |
| 0.01436                                                                      | 19.985                                         | 28.00714                                                        | 0.01436               | 19.764                                         | 27.69143                                                        |
| 0.0207                                                                       | 20.038                                         | 28.08286                                                        | 0.0207                | 19.795                                         | 27.73571                                                        |
| 0.02973                                                                      | 19.787                                         | 27.72429                                                        | 0.02973               | 19.892                                         | 27.87429                                                        |
| 0.04287                                                                      | 19.755                                         | 27.67857                                                        | 0.04287               | 19.915                                         | 27.90714                                                        |
| 0.06162                                                                      | 19.775                                         | 27.70714                                                        | 0.06162               | 19.739                                         | 27.65571                                                        |
| 0.08854                                                                      | 19.733                                         | 27.64714                                                        | 0.08854               | 19.656                                         | 27.53714                                                        |
| 0.12749                                                                      | 19.827                                         | 27.78143                                                        | 0.12749               | 19.637                                         | 27.51                                                           |
| 0.18317                                                                      | 19.738                                         | 27.65429                                                        | 0.18317               | 19.414                                         | 27.19143                                                        |
| 0.26376                                                                      | 19.103                                         | 26.74714                                                        | 0.26376               | 19.309                                         | 27.04143                                                        |
| 0.37932                                                                      | 18.998                                         | 26.59714                                                        | 0.37932               | 18.941                                         | 26.51571                                                        |
| 0.54549                                                                      | 18.201                                         | 25.45857                                                        | 0.54549               | 18.34                                          | 25.65714                                                        |
| 0.7845                                                                       | 17.844                                         | 24.94857                                                        | 0.7845                | 17.516                                         | 24.48                                                           |
| 1.1292                                                                       | 16.65                                          | 23.24286                                                        | 1.1292                | 16.354                                         | 22.82                                                           |
| 1.6235                                                                       | 15.825                                         | 22.06429                                                        | 1.6235                | 15.429                                         | 21.49857                                                        |
| 2.3363                                                                       | 14.789                                         | 20.58429                                                        | 2.3363                | 14.369                                         | 19.98429                                                        |
| 3.3598                                                                       | 13.815                                         | 19.19286                                                        | 3.3598                | 13.315                                         | 18.47857                                                        |
| 3.3598                                                                       | 13.161                                         | 18.25857                                                        | 3.3598                | 13.212                                         | 18.33143                                                        |
| 4.8321                                                                       | 13.622                                         | 18.91714                                                        | 4.8321                | 13.085                                         | 18.15                                                           |
| 6.9526                                                                       | 15.717                                         | 21.91                                                           | 6.9526                | 14.754                                         | 20.53429                                                        |
| 9.9994                                                                       | 17.767                                         | 24.83857                                                        | 9.9994                | 17.206                                         | 24.03714                                                        |
| 21                                                                           | 21.5                                           | 30.17143                                                        | 21                    | 21.48                                          | 30.14286                                                        |
| 31                                                                           | 21.04                                          | 29.51429                                                        | 31                    | 21.26                                          | 29.82857                                                        |
| 41                                                                           | 19.19                                          | 26.87143                                                        | 41                    | 19.26                                          | 26.97143                                                        |
| 49                                                                           | 17.42                                          | 24.34286                                                        | 49                    | 17.41                                          | 24.32857                                                        |
| 61                                                                           | 14.77                                          | 20.55714                                                        | 61                    | 14.88                                          | 20.71429                                                        |
| 72                                                                           | 13.11                                          | 18.18571                                                        | 72                    | 13.2                                           | 18.31429                                                        |

<sup>a</sup> Measured longitudinal relaxation rate. <sup>b</sup> Relaxivity calculated from the following equation:  $r_1 = (R_1 - {}^{H_2O}r_1) / [Gd^{3+}]$ ,  ${}^{H_2O}r_1$  being the diamagnetic longitudinal relaxation rate of water (0.38 s<sup>-1</sup> at 25°C, 0.28 s<sup>-1</sup> at 37°C).

**Table S18.** NMRD DATA P(NAM-r-0.9%-Gd.L<sub>3</sub>).

| <b>NMRD Data - P(NAM-r-0.9%-Gd.L<sub>3</sub>) - [Gd<sup>3+</sup>] = 0.43 mM</b> |                                  |                                       |                       |                                  |                                       |
|---------------------------------------------------------------------------------|----------------------------------|---------------------------------------|-----------------------|----------------------------------|---------------------------------------|
| <b>25 °C</b>                                                                    |                                  |                                       | <b>37 °C</b>          |                                  |                                       |
| <b>Magnetic Field</b>                                                           | <b>R<sub>1</sub><sup>a</sup></b> | <b>r<sub>1</sub><sup>b</sup></b>      | <b>Magnetic Field</b> | <b>R<sub>1</sub><sup>a</sup></b> | <b>r<sub>1</sub><sup>b</sup></b>      |
| <b>MHz</b>                                                                      | <b>s<sup>-1</sup></b>            | <b>mM<sup>-1</sup> s<sup>-1</sup></b> | <b>MHz</b>            | <b>s<sup>-1</sup></b>            | <b>mM<sup>-1</sup> s<sup>-1</sup></b> |
| 0.00997                                                                         | 15                               | 34                                    | 0.00997               | 15.6                             | 35.62791                              |
| 0.0144                                                                          | 15                               | 34                                    | 0.0144                | 15.6                             | 35.62791                              |
| 0.0207                                                                          | 14.9                             | 33.76744                              | 0.0207                | 15.8                             | 36.09302                              |
| 0.0297                                                                          | 14.9                             | 33.76744                              | 0.0297                | 15.6                             | 35.62791                              |
| 0.0429                                                                          | 14.8                             | 33.53488                              | 0.0429                | 15.7                             | 35.86047                              |
| 0.0616                                                                          | 14.8                             | 33.53488                              | 0.0616                | 15.7                             | 35.86047                              |
| 0.0885                                                                          | 15                               | 34                                    | 0.0885                | 15.6                             | 35.62791                              |
| 0.127                                                                           | 14.7                             | 33.30233                              | 0.127                 | 15.6                             | 35.62791                              |
| 0.183                                                                           | 14.7                             | 33.30233                              | 0.183                 | 15.4                             | 35.16279                              |
| 0.264                                                                           | 14.6                             | 33.06977                              | 0.264                 | 15.1                             | 34.46512                              |
| 0.379                                                                           | 14.1                             | 31.90698                              | 0.379                 | 14.8                             | 33.76744                              |
| 0.545                                                                           | 13.8                             | 31.2093                               | 0.545                 | 14.3                             | 32.60465                              |
| 0.785                                                                           | 13.3                             | 30.04651                              | 0.785                 | 13.5                             | 30.74419                              |
| 1.13                                                                            | 12.7                             | 28.65116                              | 1.13                  | 12.9                             | 29.34884                              |
| 1.62                                                                            | 12.2                             | 27.48837                              | 1.62                  | 12.1                             | 27.48837                              |
| 2.34                                                                            | 11.2                             | 25.16279                              | 2.34                  | 11                               | 24.93023                              |
| 3.36                                                                            | 10.2                             | 22.83721                              | 3.36                  | 9.82                             | 22.18605                              |
| 4.83                                                                            | 9.9                              | 22.13953                              | 4.83                  | 9.17                             | 20.67442                              |
| 6.95                                                                            | 10.7                             | 24                                    | 6.95                  | 10.3                             | 23.30233                              |
| 10                                                                              | 12.2                             | 27.48837                              | 10                    | 11.9                             | 27.02326                              |
| 21                                                                              | 14.45                            | 32.72093                              | 21                    | 14.7                             | 33.53488                              |
| 31                                                                              | 14.08                            | 31.86047                              | 31                    | 14.4                             | 32.83721                              |
| 41                                                                              | 12.82                            | 28.93023                              | 41                    | 13                               | 29.5814                               |
| 49                                                                              | 11.52                            | 25.90698                              | 49                    | 11.8                             | 26.7907                               |
| 61                                                                              | 9.86                             | 22.04651                              | 61                    | 10.1                             | 22.83721                              |
| 72                                                                              | 8.56                             | 19.02326                              | 72                    | 8.7                              | 19.5814                               |

<sup>a</sup> Measured longitudinal relaxation rate. <sup>b</sup> Relaxivity calculated from the following equation:  $r_1 = (R_1 - {}^{H_2O}r_1) / [Gd^{3+}]$ ,  ${}^{H_2O}r_1$  being the diamagnetic longitudinal relaxation rate of water (0.38 s<sup>-1</sup> at 25°C, 0.28 s<sup>-1</sup> at 37°C).

**Table S19.** NMRD DATA P(NAM-r-0.9%-Gd.L<sub>4</sub>).

| <b>NMRD Data - P(NAM-r-0.9%-Gd.L<sub>4</sub>) - [Gd<sup>3+</sup>] = 0.48 mM</b> |                                  |                                       |                       |                                  |                                       |
|---------------------------------------------------------------------------------|----------------------------------|---------------------------------------|-----------------------|----------------------------------|---------------------------------------|
| <b>25 °C</b>                                                                    |                                  |                                       | <b>37 °C</b>          |                                  |                                       |
| <b>Magnetic Field</b>                                                           | <b>R<sub>1</sub><sup>a</sup></b> | <b>r<sub>1</sub><sup>b</sup></b>      | <b>Magnetic Field</b> | <b>R<sub>1</sub><sup>a</sup></b> | <b>r<sub>1</sub><sup>b</sup></b>      |
| <b>MHz</b>                                                                      | <b>s<sup>-1</sup></b>            | <b>mM<sup>-1</sup> s<sup>-1</sup></b> | <b>MHz</b>            | <b>s<sup>-1</sup></b>            | <b>mM<sup>-1</sup> s<sup>-1</sup></b> |
| 0.00997                                                                         | 15.5                             | 31.5                                  | 0.00997               | 14.5                             | 29.625                                |
| 0.0144                                                                          | 15.5                             | 31.5                                  | 0.0144                | 14.5                             | 29.625                                |
| 0.0207                                                                          | 15.5                             | 31.5                                  | 0.0207                | 14.4                             | 29.41667                              |
| 0.0297                                                                          | 15.6                             | 31.70833                              | 0.0297                | 14.5                             | 29.625                                |
| 0.0429                                                                          | 15.5                             | 31.5                                  | 0.0429                | 14.5                             | 29.625                                |
| 0.0616                                                                          | 15.4                             | 31.29167                              | 0.0616                | 14.4                             | 29.41667                              |
| 0.0885                                                                          | 15.4                             | 31.29167                              | 0.0885                | 14.2                             | 29                                    |
| 0.127                                                                           | 15.2                             | 30.875                                | 0.127                 | 14.3                             | 29.20833                              |
| 0.183                                                                           | 14.9                             | 30.25                                 | 0.183                 | 14.3                             | 29.20833                              |
| 0.264                                                                           | 14.8                             | 30.04167                              | 0.264                 | 14                               | 28.58333                              |
| 0.379                                                                           | 14.5                             | 29.41667                              | 0.379                 | 13.7                             | 27.95833                              |
| 0.545                                                                           | 13.8                             | 27.95833                              | 0.545                 | 13.4                             | 27.33333                              |
| 0.785                                                                           | 13                               | 26.29167                              | 0.785                 | 12                               | 24.41667                              |
| 1.13                                                                            | 12.3                             | 24.83333                              | 1.13                  | 11                               | 22.33333                              |
| 1.62                                                                            | 11.2                             | 22.54167                              | 1.62                  | 10.1                             | 20.45833                              |
| 2.34                                                                            | 10.3                             | 20.66667                              | 2.34                  | 9.05                             | 18.27083                              |
| 3.36                                                                            | 9.7                              | 19.41667                              | 3.36                  | 8.5                              | 17.125                                |
| 4.83                                                                            | 9.42                             | 18.83333                              | 4.83                  | 8.27                             | 16.64583                              |
| 6.95                                                                            | 10.3                             | 20.66667                              | 6.95                  | 8.78                             | 17.70833                              |
| 10                                                                              | 11.2                             | 22.54167                              | 10                    | 9.73                             | 19.6875                               |
| 21                                                                              | 12.87                            | 26.02083                              | 21                    | 11.3                             | 22.95833                              |
| 31                                                                              | 12.75                            | 25.77083                              | 31                    | 11.2                             | 22.75                                 |
| 41                                                                              | 12.21                            | 24.64583                              | 41                    | 10.6                             | 21.5                                  |
| 49                                                                              | 11.5                             | 23.16667                              | 49                    | 10.1                             | 20.45833                              |
| 61                                                                              | 10.41                            | 20.89583                              | 61                    | 9.2                              | 18.58333                              |
| 72                                                                              | 9.5                              | 19                                    | 72                    | 8.6                              | 17.33333                              |
| 72                                                                              | 13.11                            | 18.18571                              | 72                    | 13.2                             | 18.31429                              |

<sup>a</sup> Measured longitudinal relaxation rate. <sup>b</sup> Relaxivity calculated from the following equation:  $r_1 = (R_1 - {}^{H_2O}r_1) / [Gd^{3+}]$ ,  ${}^{H_2O}r_1$  being the diamagnetic longitudinal relaxation rate of water (0.38 s<sup>-1</sup> at 25°C, 0.28 s<sup>-1</sup> at 37°C).



#### 4.8 Fitted NMRD profiles and NMRD Parameters obtained for the Partial Fitting (1-100 MHz) of Hyperbranched Systems NMRD Data Sets

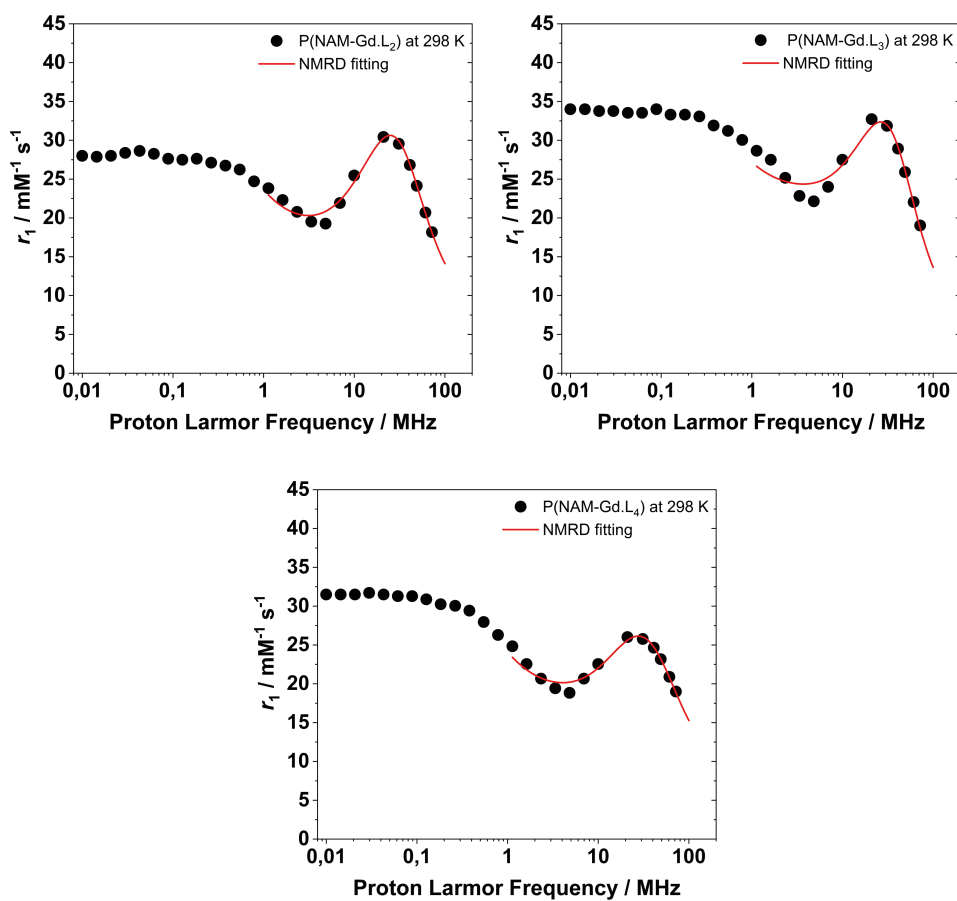

**Figure S12.** NMRD profiles of partially fitted NMRD profiles of hyperbranched systems, *i.e.* between 1 to 100 MHz.

**Table S20.** NMRD parameters of partially fitted NMRD profiles of hyperbranched systems, *i.e.* between 1 to 100 MHz.

| <b>NMRD parameters obtained from the partial fitting of hyperbranched systems NMRD data set, for high magnetic field (1 to 100 MHz)</b> |                                |                                |                                |
|-----------------------------------------------------------------------------------------------------------------------------------------|--------------------------------|--------------------------------|--------------------------------|
| <b>NMRD Best fit parameters</b>                                                                                                         | <b>P(NAM-Gd.L<sub>2</sub>)</b> | <b>P(NAM-Gd.L<sub>3</sub>)</b> | <b>P(NAM-Gd.L<sub>4</sub>)</b> |
| $\Delta^2 / 10^{18} \text{ s}^{-2}$                                                                                                     | $6.2 \pm 0.2$                  | $6.3 \pm 0.4$                  | $5.7 \pm 0.3$                  |
| $^{298}\tau_V / \text{ps}$                                                                                                              | $16.1 \pm 0.9$                 | $10.4 \pm 0.7$                 | $12.6 \pm 0.8$                 |
| $^{298}\tau_{RL} / \text{ps}$                                                                                                           | $501 \pm 45$                   | $418 \pm 99$                   | $447 \pm 34$                   |
| $^{298}\tau_{RG} / \text{ps}$                                                                                                           | $6366 \pm 486$                 | $6668 \pm 812$                 | $3810 \pm 256$                 |
| $S^2$                                                                                                                                   | 0.500                          | 0.601                          | 0.403                          |
| $^{298}\tau_M^a / \text{ns}$                                                                                                            | $326 \pm 8$                    | $308 \pm 12$                   | $315 \pm 9$                    |

To fit the  $^1\text{H}$  NMRD data at 298 K, the following parameters were fixed:  $q = 1$ ,  $r_{\text{Gd-H}} = 3.0 \text{ \AA}$ ,  $a_{\text{Gd-H}} = 4 \text{ \AA}$ ,  $^{298}D_{\text{Gd-H}} = 2.25 \times 10^{-5} \text{ cm}^2 \text{ s}^{-1}$ . <sup>a</sup> Estimated from VT NMR relaxivity profiles (Figure 5) at fixed magnetic field (20 MHz).



#### 4.9 Fitted NMRD profiles and NMRD parameters obtained for the fitting of Hyperbranched Systems over the all magnetic field range 0.01-100 MHz

##### NMRD Data Sets

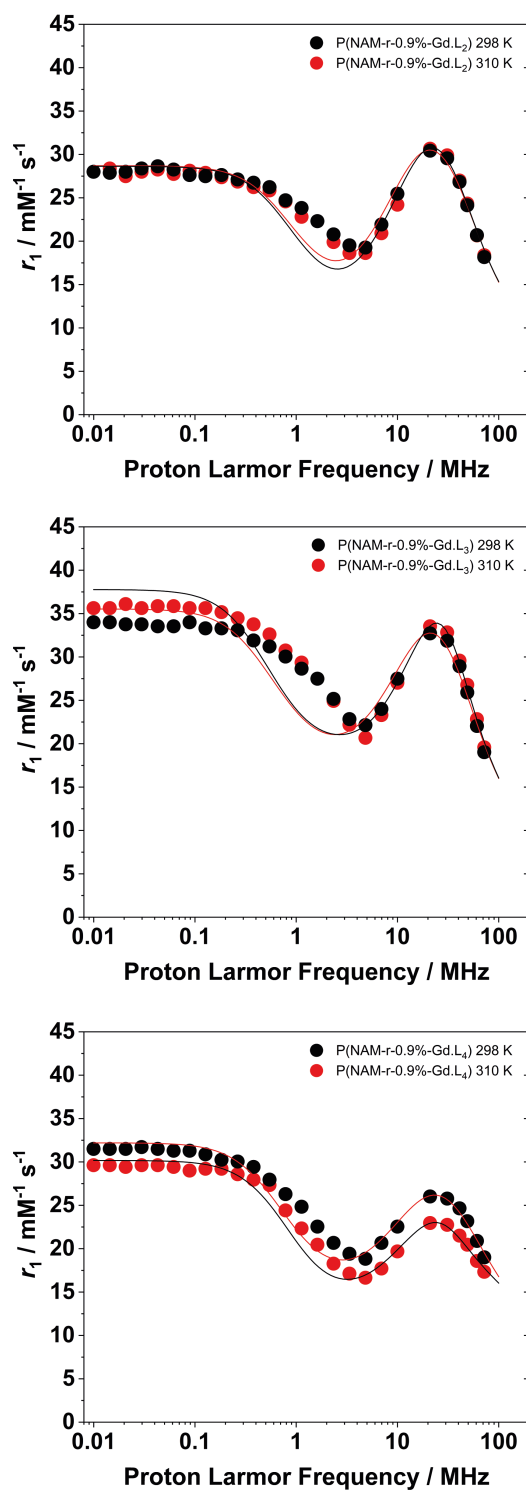

**Figure S13.** Fitted NMRD profiles of synthesised hyperbranched  $\text{P(NAM-r-Gd.L}_{2-4}\text{)}$  systems at 25 and 37 °C. Solid red and black lines correspond to the fitting of data sets.

**Table S21.** NMRD parameters obtained from the fitting of hyperbranched systems NMRD profiles between 0.01-100 MHz.

| <b>NMRD parameters obtained from the partial fitting of hyperbranched systems NMRD data set, for high magnetic field (1 to 100 MHz)</b> |                                |                                |                                |
|-----------------------------------------------------------------------------------------------------------------------------------------|--------------------------------|--------------------------------|--------------------------------|
| <b>NMRD Best fit parameters</b>                                                                                                         | <b>P(NAM-Gd.L<sub>2</sub>)</b> | <b>P(NAM-Gd.L<sub>3</sub>)</b> | <b>P(NAM-Gd.L<sub>4</sub>)</b> |
| $\Delta^2 / 10^{18} \text{ s}^{-2}$                                                                                                     | $6.4 \pm 0.2$                  | $5.6 \pm 0.1$                  | $5.22 \pm 0.06$                |
| $^{298}\tau_V / \text{ps}$                                                                                                              | $29 \pm 1$                     | $23.1 \pm 0.5$                 | $23.5 \pm 0.3$                 |
| $^{298}\tau_{RL} / \text{ps}$                                                                                                           | $595 \pm 67$                   | $731 \pm 45$                   | $690 \pm 14$                   |
| $^{298}\tau_{RG} / \text{ps}$                                                                                                           | $5600 \pm 800$                 | $6200 \pm 500$                 | $4000 \pm 200$                 |
| $S^2$                                                                                                                                   | 0.458                          | 0.601                          | 0.403                          |
| $^{298}\tau_M^a / \text{ns}$                                                                                                            | $326 \pm 8$                    | $308 \pm 12$                   | $318 \pm 3$                    |

To fit the  $^1\text{H}$  NMRD data at 298 K, the following parameters were fixed:  $q = 1$ ,  $r_{\text{Gd-H}} = 3.0 \text{ \AA}$ ,  $a_{\text{Gd-H}} = 4 \text{ \AA}$ ,  $^{298}D_{\text{Gd-H}} = 2.25 \times 10^{-5} \text{ cm}^2 \text{ s}^{-1}$ . <sup>a</sup> Estimated from VT NMR relaxivity profiles (Figure 5) at fixed magnetic field (20 MHz).

We have fitted the NMRD profiles in Figure 5 (B3) to the high field region (1-100 MHz), and the data for all hyperbranched polymers is presented in the ESI (Figure S12) together with the parameters used to perform the fitting (in the main text in Tables 4 and 5, and in Table S20 of the ESI). We agree that the poor fit of the data in the region 0.5-5 MHz is a consequence of the limitations in relaxation theory, specifically limitations in the SBM theory and of the Lipari-Szabo approach to account for the electron spin relaxation of slowly rotating molecules at these Larmor frequencies.<sup>25</sup> We note that parameters obtained by fitting only the high field data (Figure S12 & Table S20) very similar to those obtained when fitting over the entire Larmor frequency range (Figure S13 and Table S21). Only small differences in the electronic parameters and in the local correlation time were observed, as expected since the fitting of the low field region is necessary to establish reliable electronic parameters. However, the conclusions we draw from the fitting are the same.

#### 4.10 VT Profiles of Linear Polymeric Systems

**Table S22.** Variable temperature profiles of polymeric systems P(NAM-r-1%-Gd.L<sub>1</sub>) and P(NAM-r-17%-Gd.L<sub>1</sub>).

| <b>VT Profile at 20 MHz - P(NAM-r-1%-Gd.L<sub>1</sub>) - [Gd<sup>3+</sup>]= 1.21 mM</b>   |                         |                                                    |                            |                                             |
|-------------------------------------------------------------------------------------------|-------------------------|----------------------------------------------------|----------------------------|---------------------------------------------|
| <b>Temperature</b><br>°C                                                                  | <b>Temperature</b><br>K | $^{H_2O}r_1^a$<br>mM <sup>-1</sup> s <sup>-1</sup> | $R_1^b$<br>s <sup>-1</sup> | $r_1^c$<br>mM <sup>-1</sup> s <sup>-1</sup> |
| 4.2                                                                                       | 277.35                  | 0.62966                                            | 20.99                      | 16.96695                                    |
| 11.7                                                                                      | 284.85                  | 0.52317                                            | 22.81                      | 18.57235                                    |
| 18.7                                                                                      | 291.85                  | 0.4401                                             | 23.7                       | 19.38325                                    |
| 23.4                                                                                      | 296.55                  | 0.39186                                            | 23.3                       | 19.09012                                    |
| 30.3                                                                                      | 303.45                  | 0.33045                                            | 21.81                      | 17.89963                                    |
| 37.1                                                                                      | 310.25                  | 0.27935                                            | 19.78                      | 16.25054                                    |
| 43.3                                                                                      | 316.45                  | 0.23968                                            | 17.4                       | 14.30027                                    |
| 50.3                                                                                      | 323.45                  | 0.20162                                            | 15.11                      | 12.42365                                    |
| 55.9                                                                                      | 329.05                  | 0.17557                                            | 13.21                      | 10.86202                                    |
| 62.1                                                                                      | 335.25                  | 0.15064                                            | 11.64                      | 9.57447                                     |
| 66                                                                                        | 339.15                  | 0.13681                                            | 10.73                      | 8.82766                                     |
| 70.8                                                                                      | 343.95                  | 0.12151                                            | 9.63                       | 7.92374                                     |
| <b>VT Profile at 20 MHz - P(NAM-r-17%-Gd.L<sub>1</sub>) - [Gd<sup>3+</sup>]= 2.665 mM</b> |                         |                                                    |                            |                                             |
| <b>Temperature</b><br>°C                                                                  | <b>Temperature</b><br>K | $^{H_2O}r_1^a$<br>mM <sup>-1</sup> s <sup>-1</sup> | $R_1^b$<br>s <sup>-1</sup> | $r_1^c$<br>mM <sup>-1</sup> s <sup>-1</sup> |
| 4.1                                                                                       | 277.25                  | 0.61734                                            | 42.78567                   | 15.82301                                    |
| 10.4                                                                                      | 283.55                  | 0.54561                                            | 46.523                     | 17.2523                                     |
| 15.1                                                                                      | 288.25                  | 0.48222                                            | 48.43525                   | 17.99363                                    |
| 20.3                                                                                      | 293.45                  | 0.42619                                            | 48.677                     | 18.10537                                    |
| 24.8                                                                                      | 297.95                  | 0.37667                                            | 47.42067                   | 17.65253                                    |
| 30.1                                                                                      | 303.25                  | 0.3329                                             | 44.76733                   | 16.67333                                    |
| 34.9                                                                                      | 308.05                  | 0.29422                                            | 41.59067                   | 15.49585                                    |
| 40.1                                                                                      | 313.25                  | 0.26004                                            | 37.838                     | 14.10055                                    |
| 45.2                                                                                      | 318.35                  | 0.22982                                            | 34.182                     | 12.74003                                    |
| 50.2                                                                                      | 323.35                  | 0.20312                                            | 30.711                     | 11.44761                                    |
| 55.1                                                                                      | 328.25                  | 0.17952                                            | 27.55425                   | 10.27194                                    |
| 60.1                                                                                      | 333.25                  | 0.15866                                            | 24.79925                   | 9.246                                       |
| 65.4                                                                                      | 338.55                  | 0.14023                                            | 21.983                     | 8.19616                                     |
| 70.2                                                                                      | 343.35                  | 0.12393                                            | 19.8485                    | 7.40134                                     |

<sup>a</sup>  $^{H_2O}r_1$  is the diamagnetic longitudinal relaxation rate of water obtain with empirical equation:  $^{H_2O}r_1 = (0.9756^T) \times 0.6985$  with  $T$  in °C. <sup>b</sup> Measured longitudinal relaxation rate. <sup>c</sup> Relaxivity calculated from the following equation:  $r_1 = (R_1 - ^{H_2O}r_1) / [Gd^{3+}]$ .

#### 4.11 VT Profiles of Hyperbranched Polymeric Systems

**Table S23.** Variable temperature profiles of hyperbranched polymeric systems P(NAM-r-Gd.L<sub>2-3</sub>).

| <b>VT Profile 20 MHz - P(NAM-r-0.9%-Gd.L<sub>2</sub>) - [Gd<sup>3+</sup>]= 0.70 mM</b> |                          |                                                      |                                  |                                                 |
|----------------------------------------------------------------------------------------|--------------------------|------------------------------------------------------|----------------------------------|-------------------------------------------------|
| <b>Temperature<br/>°C</b>                                                              | <b>Temperature<br/>K</b> | $H_2O r_1^a$<br><b>mM<sup>-1</sup>s<sup>-1</sup></b> | $R_1^b$<br><b>s<sup>-1</sup></b> | $r_1^c$<br><b>mM<sup>-1</sup>s<sup>-1</sup></b> |
| 4.2                                                                                    | 0.62966                  | 277.35                                               | 16.04                            | 22.01477                                        |
| 11.7                                                                                   | 0.52317                  | 284.85                                               | 18.36                            | 25.48118                                        |
| 18.7                                                                                   | 0.4401                   | 291.85                                               | 20.73                            | 28.98557                                        |
| 23.4                                                                                   | 0.39186                  | 296.55                                               | 22.13                            | 31.05449                                        |
| 30.3                                                                                   | 0.33045                  | 303.45                                               | 22.77                            | 32.0565                                         |
| 37.1                                                                                   | 0.27935                  | 310.25                                               | 22.26                            | 31.40093                                        |
| 43.3                                                                                   | 0.23968                  | 316.45                                               | 21.14                            | 29.8576                                         |
| 50.3                                                                                   | 0.20162                  | 323.45                                               | 19.39                            | 27.41197                                        |
| 55.9                                                                                   | 0.17557                  | 329.05                                               | 17.7                             | 25.03489                                        |
| 62.1                                                                                   | 0.15064                  | 335.25                                               | 15.88                            | 22.47051                                        |
| 66                                                                                     | 0.13681                  | 339.15                                               | 14.73                            | 20.84742                                        |
| 70.8                                                                                   | 0.12151                  | 343.95                                               | 13.61                            | 19.26927                                        |
| 65.4                                                                                   | 0.13885                  | 338.55                                               | 4.631                            | 6.32697                                         |
| 69.7                                                                                   | 0.12486                  | 342.85                                               | 4.22                             | 5.76781                                         |
| <b>VT Profile 20 MHz - P(NAM-r-0.9%-Gd.L<sub>3</sub>) - [Gd<sup>3+</sup>]= 0.43 mM</b> |                          |                                                      |                                  |                                                 |
| <b>Temperature<br/>°C</b>                                                              | <b>Temperature<br/>K</b> | $H_2O r_1^a$<br><b>mM<sup>-1</sup>s<sup>-1</sup></b> | $R_1^b$<br><b>s<sup>-1</sup></b> | $r_1^c$<br><b>mM<sup>-1</sup>s<sup>-1</sup></b> |
| 3.8                                                                                    | 0.63592                  | 276.95                                               | 9.96475                          | 21.69496                                        |
| 10.2                                                                                   | 0.54292                  | 283.35                                               | 11.37325                         | 25.18681                                        |
| 15.1                                                                                   | 0.48103                  | 288.25                                               | 12.70225                         | 28.42145                                        |
| 20.4                                                                                   | 0.422                    | 293.55                                               | 13.87267                         | 31.28062                                        |
| 24.9                                                                                   | 0.3776                   | 298.05                                               | 14.53225                         | 32.91779                                        |
| 29.9                                                                                   | 0.33373                  | 303.05                                               | 14.977                           | 34.05412                                        |
| 34.9                                                                                   | 0.29495                  | 308.05                                               | 14.94833                         | 34.07763                                        |
| 39.9                                                                                   | 0.26068                  | 313.05                                               | 14.54475                         | 33.21876                                        |
| 45.1                                                                                   | 0.22926                  | 318.25                                               | 13.891                           | 31.77149                                        |
| 50.2                                                                                   | 0.20212                  | 323.35                                               | 13.07675                         | 29.941                                          |
| 55                                                                                     | 0.17952                  | 328.15                                               | 12.25533                         | 28.08328                                        |
| 60.4                                                                                   | 0.1571                   | 333.55                                               | 11.17                            | 25.61139                                        |
| 65.6                                                                                   | 0.13816                  | 338.75                                               | 10.224                           | 23.45543                                        |
| 70.4                                                                                   | 0.12272                  | 343.55                                               | 9.35333                          | 21.46655                                        |

<sup>a</sup>  $H_2O r_1$  is the diamagnetic longitudinal relaxation rate of water obtain with empirical equation:  $H_2O r_1 = (0.9756^T) \times 0.6985$  with  $T$  in °C. <sup>b</sup> Measured longitudinal relaxation rate. <sup>c</sup> Relaxivity calculated from the following equation:  $r_1 = (R_1 - H_2O r_1) / [Gd^{3+}]$ .

**Table S24.** Variable temperature profiles of hyperbranched polymeric systems P(NAM-r-Gd.L<sub>4</sub>).

| <b>VT Profile 20 MHz - P(NAM-r-0.9%-Gd.L<sub>4</sub>) - [Gd<sup>3+</sup>]= 0.48 mM</b> |                    |                                      |                       |                                      |
|----------------------------------------------------------------------------------------|--------------------|--------------------------------------|-----------------------|--------------------------------------|
| <b>Temperature</b>                                                                     | <b>Temperature</b> | $^{H_2O}r_1^a$                       | $R_1^b$               | $r_1^c$                              |
| <b>°C</b>                                                                              | <b>K</b>           | <b>mM<sup>-1</sup>s<sup>-1</sup></b> | <b>s<sup>-1</sup></b> | <b>mM<sup>-1</sup>s<sup>-1</sup></b> |
| 3.8                                                                                    | 0.63592            | 276.95                               | 13.20475              | 26.18507                             |
| 10.2                                                                                   | 0.54292            | 283.35                               | 13.36567              | 26.71405                             |
| 14.9                                                                                   | 0.48341            | 288.05                               | 13.47067              | 27.05678                             |
| 20.4                                                                                   | 0.422              | 293.55                               | 13.36375              | 26.96198                             |
| 24.8                                                                                   | 0.37854            | 297.95                               | 12.954                | 26.19888                             |
| 29.9                                                                                   | 0.33373            | 303.05                               | 12.36733              | 25.07001                             |
| 34.9                                                                                   | 0.29495            | 308.05                               | 11.63567              | 23.62649                             |
| 39.9                                                                                   | 0.26068            | 313.05                               | 10.78                 | 21.91525                             |
| 45.2                                                                                   | 0.22869            | 318.35                               | 9.87033               | 20.08675                             |
| 50.1                                                                                   | 0.20262            | 323.25                               | 9.04067               | 18.4126                              |
| 54.9                                                                                   | 0.17996            | 328.05                               | 8.22533               | 16.76118                             |
| 60.4                                                                                   | 0.1571             | 333.55                               | 7.34167               | 14.96784                             |
| 65.8                                                                                   | 0.13748            | 338.95                               | 6.62075               | 13.50681                             |
| 70.3                                                                                   | 0.12302            | 343.45                               | 6.0035                | 12.251                               |

<sup>a</sup>  $^{H_2O}r_1$  is the diamagnetic longitudinal relaxation rate of water obtain with empirical equation:  $^{H_2O}r_1 = (0.9756^T) \times 0.6985$  with  $T$  in °C. <sup>b</sup> Measured longitudinal relaxation rate. <sup>c</sup> Relaxivity calculated from the following equation:  $r_1 = (R_1 - ^{H_2O}r_1) / [Gd^{3+}]$ .

#### 4.12 Discussion over VT Profiles

The analysis presented in Figure 5 (C1-C3), is a combination of <sup>17</sup>O data (C1) and variable temperature data (C2 and C3). Unfortunately, we were unable to carry out <sup>17</sup>O analysis of the polymers as the concentration of Gd(III) complex required for such experiments is greater than 5 mM, significantly higher than the Gd(III) concentrations used to prepare the polymers. In order to provide reliable estimates of water residence lifetimes we fitted the VT <sup>1</sup>H NMR profiles for the linear and hyperbranched polymers.

It is not possible to compare the position of the peaks observed in the <sup>17</sup>O plot in C1 with the VT <sup>1</sup>H NMR profiles in C2 and C3. However, we are able to compare the VT profiles obtained for the linear and crosslinked polymers. In doing so, it is clear that the temperature dependence in the <sup>1</sup>H NMR spectra of the linear polymers containing Gd.L<sub>1</sub> closely resembles that of the crosslinked polymer containing Gd.L<sub>4</sub>, with profile peaks observed around 290 K. In contrast, for the crosslinked polymers containing Gd.L<sub>2</sub> or Gd.L<sub>3</sub>, the VT profile peaks at higher temperatures of around 310 K. Considering that a similar rate of the water exchange was estimated for all of the linear and crosslinked polymers (308 – 330 ns, see Table 5), the shift



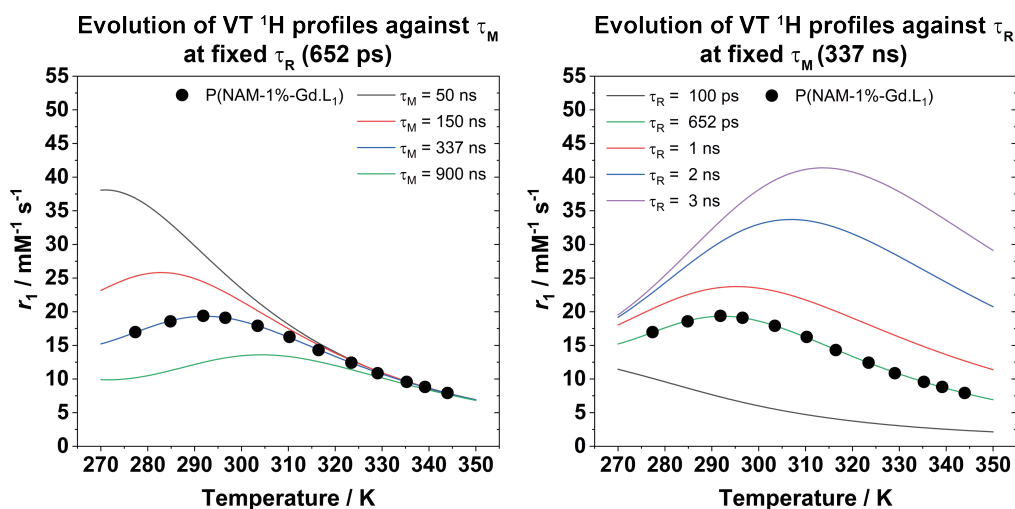

**Figure S14.** Using the experimental VT profile of P(NAM-1%-Gd.L<sub>1</sub>) (•), simulation of the evolution of the VT profiles shape depending on: (left) a change of water residence time  $\tau_M$ , or (right) rotational correlation time  $\tau_R$ , while keeping all other fitting parameters constant.  $S = 3.5$ ,  $F = 21$ ,  $\Delta^2 = 4.38 \times 10^{18} \text{ s}^{-2}$ ,  $\tau_V = 42.1 \text{ ps}$ ,  $E_V = 1 \text{ KJ mol}^{-1}$ ,  $\tau_M = 337 \text{ ns}$ ,  $\Delta H_M = 36 \text{ KJ mol}^{-1}$ ,  $\tau_R = 652 \text{ ps}$ ,  $E_R = 20 \text{ KJ mol}^{-1}$ ,  $q = 1$ ,  $r_{Gd-H} = 3.0 \text{ \AA}$ ,  $a_{Gd-H} = 4.0 \text{ \AA}$ ,  $D_0 = 2.24 \times 10^{-5} \text{ cm}^2 \text{ s}^{-1}$ ,  $H_D = -3.09 \times 10^4$ .

in the VT profile peaks to higher temperature for the crosslinked polymers of Gd.L<sub>2</sub> or Gd.L<sub>3</sub> may be reasonably attributed to the slower local and global rotational correlation times of these systems. This is consistent with the higher order parameter ( $S^2 \approx 0.55$ ) determined for the crosslinked polymers of Gd.L<sub>2</sub> or Gd.L<sub>3</sub>, which we discuss on page 9 of the manuscript. We considered whether it was possible to correlate a shift in the temperature at which the VT profile peaks with either an increase or decrease of  $\tau_M$  or  $\tau_R$ , but concluded that it is not possible, since both parameters influence the relaxivity maximum of the VT profiles. To demonstrate this, in the figure below (Figure S14) we have simulated some VT profiles from our experimental data (a linear polymer of P(NAM-r-Gd.L<sub>1</sub>)), which represent the independent influence of tumbling and water exchange rate on the temperature at which the VT profile peaks. A decrease in  $\tau_M$  does lead to a shift of the VT profile maximum towards lower temperature. However, increasing  $\tau_R$  generates the opposite effect. Thus, the shift of VT profile maximum will depend on which parameter dominates the relaxivity at the magnetic field studied. For our slowly tumbling macromolecules, it is reasonable to assume that  $\tau_R$  is the primary factor influencing the maximum of the VT profile peak. Through these simulations, we are able to validate our estimation of the water exchange rates.

## 5 Theoretical Models to Explain Paramagnetic Relaxation Enhancement

### 5.1 Discrete Complex NMRD Profiles - the Solomon-Bloembergen-Morgan Theory

Here, are summarised the theory and the equations necessary for the analysis of a  $^1\text{H}$  NMRD profile. First, the observed longitudinal proton relaxation rate, in a solution of paramagnetic molecules, is the sum of a diamagnetic contribution  $R_1^D$  (proton relaxation rate of pure solvent) plus the paramagnetic contribution to the relaxation rate induced by the paramagnetic molecule  $R_1^P$ . This paramagnetic contribution is expressed as the longitudinal relaxivity times  $r_1$  the concentration of paramagnetic centres, here  $[\text{Gd}^{3+}]$  (**Equation 3**).

$$R_1^{obs} = R_1^D + R_1^P = R_1^D + r_1[\text{Gd}^{3+}] \quad (3)$$

The longitudinal proton relaxivity measured by relaxometry is also the results of two distinct contributions: the inner-sphere IS and outer-sphere OS relaxivity. Thus relaxivity can be describe by **Equation 4**.

$$r_1 = r_1^{IS} + r_1^{OS} \quad (4)$$

The IS contribution is defined by **Equation 5** when normalised to 1 mM Gd concentration, with  $q$  the number of water molecules simultaneity bound to the paramagnetic centre,  $\tau_m$  the residence time of an inner-sphere water molecule and  $T_{1m}^H$  the relaxation time of inner-sphere protons.

$$r_1^{IS} = \frac{1}{1000} \times \frac{q}{55.55} \times \frac{1}{T_{1m}^H + \tau_m} \quad (5)$$

Then,  $1/T_{1m}^H$ , the longitudinal relaxation rate of the inner sphere protons can be expressed following **Equation 6**, where  $r_{GdH}$  is the distance between Gd and inner-sphere water protons,  $\omega_I$  is the proton resonance frequency,  $\omega_S$  is the Larmor frequency of the Gd electron spin ( $\omega_S = 658\omega_I$ ),  $S$  is the electron spin,  $\gamma_S$  is the electron gyromagnetic ratio and  $\gamma_I$  is the nuclear gyromagnetic ratio,  $\mu_0$  is the permeability constant,  $\hbar$  reduced Planck constant and the correlation times  $\tau_{di}$  can be expressed by **Equation 7**.

$$\frac{1}{T_{1m}^H} = \frac{2}{15} \left( \frac{\mu_0}{4\pi} \right)^2 \frac{\hbar^2 \gamma_I^2 \gamma_S^2}{r_{GdH}^6} S(S+1) \times \left[ \frac{3\tau_{d1}}{1 + \omega_I^2 \tau_{d1}^2} + \frac{7\tau_{d2}}{1 + \omega_S^2 \tau_{d2}^2} \right] \quad (6)$$

$$\frac{1}{\tau_{di}} = \frac{1}{\tau_m} + \frac{1}{\tau_R} + \frac{1}{T_{ie}} \quad i = 1, 2 \quad (7)$$

The longitudinal and transverse electronic relaxation rates,  $1/T_{1e}$  and  $1/T_{2e}$  are estimated by **Equation 8** and **Equation 9** respectively. In these equations,  $\Delta^2$  is the mean square zero-field-splitting energy and  $\tau_V$  is the electronic correlation time for the modulation of the ZFS interaction.

$$\frac{1}{T_{1e}} = \frac{1}{25} \Delta^2 \tau_V [4S(S+1) - 3] \times \left( \frac{1}{1 + \omega_S^2 \tau_V^2} + \frac{4}{1 + 4\omega_S^2 \tau_V^2} \right) \quad (8)$$

$$\frac{1}{T_{2e}} = \frac{1}{50} \Delta^2 \tau_V [4S(S+1) - 3] \times \left( \frac{5}{1 + \omega_S^2 \tau_V^2} + \frac{2}{1 + 4\omega_S^2 \tau_V^2} + 3 \right) \quad (9)$$

The correlation times  $\tau_V$  and  $\tau_R$  used in previous equations are temperature dependent and can be described following Arrhenius laws (**Equations 10**), where  $E_V$  and  $E_R$  are the associated activation energies.

$$\tau_V = \tau_V^{298} \exp \left[ \frac{E_V}{R} \left( \frac{1}{T} - \frac{1}{298.15} \right) \right] \quad \tau_R = \tau_R^{298} \exp \left[ \frac{E_R}{R} \left( \frac{1}{T} - \frac{1}{298.15} \right) \right] \quad (10)$$

The second term of the longitudinal relaxivity is the outer-sphere relaxivity than can be described with **Equation 11**.

$$r_1^{OS} = \frac{32N_A\pi}{405} \left( \frac{\mu_0}{4\pi} \right)^2 \frac{\hbar^2 \gamma_S^2 \gamma_I^2}{a_{GdH} D_{GdH}} S(S+1) [3J_{os}(\omega_I; T_{1e}) + 7J_{os}(\omega_S; T_{2e})] \quad (11)$$

In this equation,  $N_A$  is the Avogadro constant,  $a_{GdH}$  is the minimum distance between the water molecule and the complex,  $D_{GdH}$  is the sum of the diffusion coefficients of water away from a Gd complex,  $\tau_{GdH}$  is a diffusion correlation time and is equal to  $\tau_{GdH} = a_{GdH}^2/D_{GdH}$  and  $J_{OS}$  is the realpart of spectral density function described in **Equation 12** with  $j = 1, 2$ .

$$J_{os}(\omega, T_{je}) = Re \left[ \frac{1 + \frac{1}{4} \left( i\omega\tau_{GdH} + \frac{\tau_{GdH}}{T_e} \right)^{\frac{1}{2}}}{1 + \left( i\omega\tau_{GdH} + \frac{\tau_{GdH}}{T_e} \right)^{\frac{1}{2}} + \frac{4}{9} \left( i\omega\tau_{GdH} + \frac{\tau_{GdH}}{T_e} \right) + \frac{1}{9} \left( i\omega\tau_{GdH} + \frac{\tau_{GdH}}{T_e} \right)^{\frac{3}{2}}} \right] \quad (12)$$

Like  $\tau_V$  and  $\tau_R$ ,  $D_{GdH}$  is temperature dependant and is following an Arrhenius law (**Equation 13** characterised by the activation energy  $E_{DGdH}$ ).

$$D_{GdH} = D_{GdH}^{298} \exp \left\{ \frac{E_{DGdH}}{R} \left( \frac{1}{298.15} - \frac{1}{T} \right) \right\} \quad (13)$$

## 5.2 Macromolecules NMRD Profiles - the Lipari-Szabo Model

As the SBM-theory neglects the effects induced by macromolecular or large molecular weight paramagnetic systems, it limited the analysis of the NMRD profiles of such systems. To overcome, this limitation, a variation of the SBM-theory was developed by Giovanni Lipari and Attila Szabo. The approach distinguish two different motions, the fast local motion of a paramagnetic moiety represented by a local correlation time  $\tau_{RL}$ , attached to a slow motion molecule characterised by a global correlation time  $\tau_{RG}$ . The model is also defined by an order parameter  $S^2$ , which describes the degree of restriction of the local motion by the rest of the molecule. If  $S^2 = 0$ , both motions are independent and if  $S^2 = 1$  both motion are totally correlated. With the Lipari-Szabo, the longitudinal relaxation rate of the inner-sphere protons is now expressed by **Equations 14**.

$$\begin{aligned} \frac{1}{T_{lm}^H} = & \frac{2}{15} \left( \frac{\mu_0}{4\pi} \right)^2 \frac{\gamma_I^2 g^2 \mu_B^2}{r_{GdH}^6} S(S+1) \left[ \frac{3S^2 \tau_{d1g}}{1 + \omega_I^2 \tau_{d1g}^2} \right. \\ & \left. + \frac{3(1-S^2) \tau_{d1}}{1 + \omega_I^2 \tau_{d1}^2} + \frac{7S^2 \tau_{d2g}}{1 + \omega_I^2 \tau_{d2g}^2} + \frac{7(1-S^2) \tau_{d2}}{1 + \omega_I^2 \tau_{d2}^2} \right] \end{aligned} \quad (14)$$

With  $\tau_{di}$ ,  $\tau_{di}$  and  $\tau$  defined respectively in **Equations 15**, 16, 17

$$\frac{1}{\tau_{di}} = \frac{1}{\tau_m} + \frac{1}{\tau} + \frac{1}{T_{ie}} \quad i = 1, 2 \quad (15)$$

$$\frac{1}{\tau_{dig}} = \frac{1}{\tau_m} + \frac{1}{\tau_{RG}} + \frac{1}{T_{ie}} \quad i = 1, 2 \quad (16)$$

$$\frac{1}{\tau} = \frac{1}{\tau_{RG}} + \frac{1}{\tau_{RL}} \quad (17)$$

# References

- [1] Townsend, T. R.; Moyle-Heyrman, G.; Sukerkar, P. A.; MacRenaris, K. W.; Burdette, J. E.; Meade, T. J. *Bioconjugate Chem.* **2014**, *25*, 1428–1437.
- [2] Srivastava, P.; Tiwari, A. K.; Chadha, N.; Chuttani, K.; Mishra, A. K. *Eur. J. Med. Chem* **2013**, *65*, 12–20.
- [3] Rigaux, G.; Roullin, V. G.; Cadiou, C.; Portefaix, C.; Van Gulick, L.; Bœuf, G.; Andry, M. C.; Hoeffel, C.; Vander Elst, L.; Laurent, S.; Muller, R.; Molinari, M.; Chuburu, F. *Nanotechnology* **2014**, *25*, 445103.
- [4] Wang, K.; Chen, S.; Zhang, W. *Macromolecules* **2017**, *50*, 4686–4698.
- [5] Wang, L.; Lin, H.; Ma, L.; Sun, C.; Huang, J.; Li, A.; Zhao, T.; Chen, Z.; Gao, J. *J. Mater. Chem. B* **2017**, *5*, 8004–8012.
- [6] Harris, M.; Vander Elst, L.; Laurent, S.; Parac-Vogt, T. N. *Dalton Trans.* **2016**, *45*, 4791–4801.
- [7] Li, C.; Wong, W.-T. *J. Org. Chem.* **2003**, *68*, 2956–2959.
- [8] Kovacs, Z.; Sherry, A. D. *ChemComm* **1995**, 185.
- [9] Kovacs, Z.; Sherry, A. D. *Synthesis* **1997**, 1997, 759–763.
- [10] Adhikari, A.; Kumari, N.; Adhikari, M.; Kumar, N.; Tiwari, A. K.; Shukla, A.; Mishra, A. K.; Datta, A. *Bioorg. Med. Chem.* **2017**, *25*, 3483–3490.
- [11] Hopper, L. E.; Allen, M. J. *Tetrahedron Lett.* **2014**, *55*, 5560–5561.
- [12] Hirayama, T.; Taki, M.; Kodan, A.; Kato, H.; Yamamoto, Y. *ChemComm* **2009**, 3196.
- [13] Butler, S. J. *ChemComm* **2015**, *51*, 10879–10882.
- [14] Samuels, E. R.; Sevrioukova, I. F. *Tetrahedron Lett.* **2018**, *59*, 1140–1142.
- [15] Moumne, R.; Lavielle, S.; Karoyan, P. *J. Org. Chem.* **2006**, *71*, 3332–3334.
- [16] Tka, N.; Kraïem, J.; Hassine, B. B. *Synth. Commun.* **2013**, *43*, 735–743.
- [17] Souers, A. J.; Schürer, S.; Kwack, H.; Virgilio, A. A.; Ellman, J. A. *Synthesis* **1999**, *4*, 583–585.
- [18] Sim, N.; Pal, R.; Parker, D.; Engelmann, J.; Mishra, A.; Gottschalk, S. *Org. Biomol. Chem.* **2014**, *12*, 9389–9404.

- [19] Kielar, F.; Tei, L.; Terreno, E.; Botta, M. *J. Am. Chem. Soc.* **2010**, *132*, 7836–7837.
- [20] Alb, A. M.; Enohnyaket, P.; Drenski, M. F.; Shunmugam, R.; Tew, G. N.; Reed, W. F. *Macromolecules* **2006**, *39*, 8283–8292.
- [21] Pei, X.; Zan, T.; Li, H.; Chen, Y.; Shi, L.; Zhang, Z. *ACS Macro Lett.* **2015**, *4*, 1215–1219.
- [22] Lu, M.; Wang, Y.-K.; Zhao, J.; Lu, H.; Stenzel, M. H.; Xiao, P. *Macromol. Rapid Commun.* **2016**, *37*, 2023–2029.
- [23] Dey, P.; Rajdev, P.; Pramanik, P.; Ghosh, S. *Macromolecules* **2018**, *51*, 5182–5190.
- [24] Corsi, D. M.; Platas-Iglesias, C.; Bekkum, H. v.; Peters, J. A. *Magn. Reson. Chem.* **2001**, *39*, 723–726.
- [25] Jaszberenyi, Z.; Moriggi, L.; Schmidt, P.; Weidensteiner, C.; Kneuer, R.; Merbach, A. E.; Helm, L.; Toth, E. *J. Biol. Inorg. Chem.* **2007**, *12*, 406–420.
